# Supplementary material for: Diastereoselective synthesis of trans-2,3-dihydroindoles via formal [4 + 1] annulation reactions of a sulfonium ylide
Source: Royal Society of Chemistry journal article supplement (doi:10.1039/d3ob01793a), 2023-12-18
Supplement: d3ob01793a1.pdf [file d3ob01793a1.pdf]

## Supplementary Information

### Diastereoselective Synthesis of *trans*-2,3-Dihydroindoles via Formal [4+1] Annulation Reactions of Sulfonium Ylide

Anshul Jain,<sup>a</sup> Akanksha Kumari,<sup>a</sup> Ramesh K. Metre,<sup>a</sup> Nirmal K. Rana<sup>a\*</sup>

<sup>a</sup>Department of Chemistry, Indian Institute of Technology Jodhpur, Jodhpur-342030, India

Email: nirmalrana@iitj.ac.in

| Sr No. | Table of Contents                              | Page No. |
|--------|------------------------------------------------|----------|
| 1.     | <sup>1</sup> H and <sup>13</sup> C NMR spectra | S2-S45   |
| 2.     | HRMS Data                                      | S46-S47  |
| 3.     | HPLC Data                                      | S48      |
| 4.     | X-ray crystal structure of <b>3aaa</b>         | S49-S50  |

# 1. $^1\text{H}$ and $^{13}\text{C}\{^1\text{H}\}$ NMR spectra

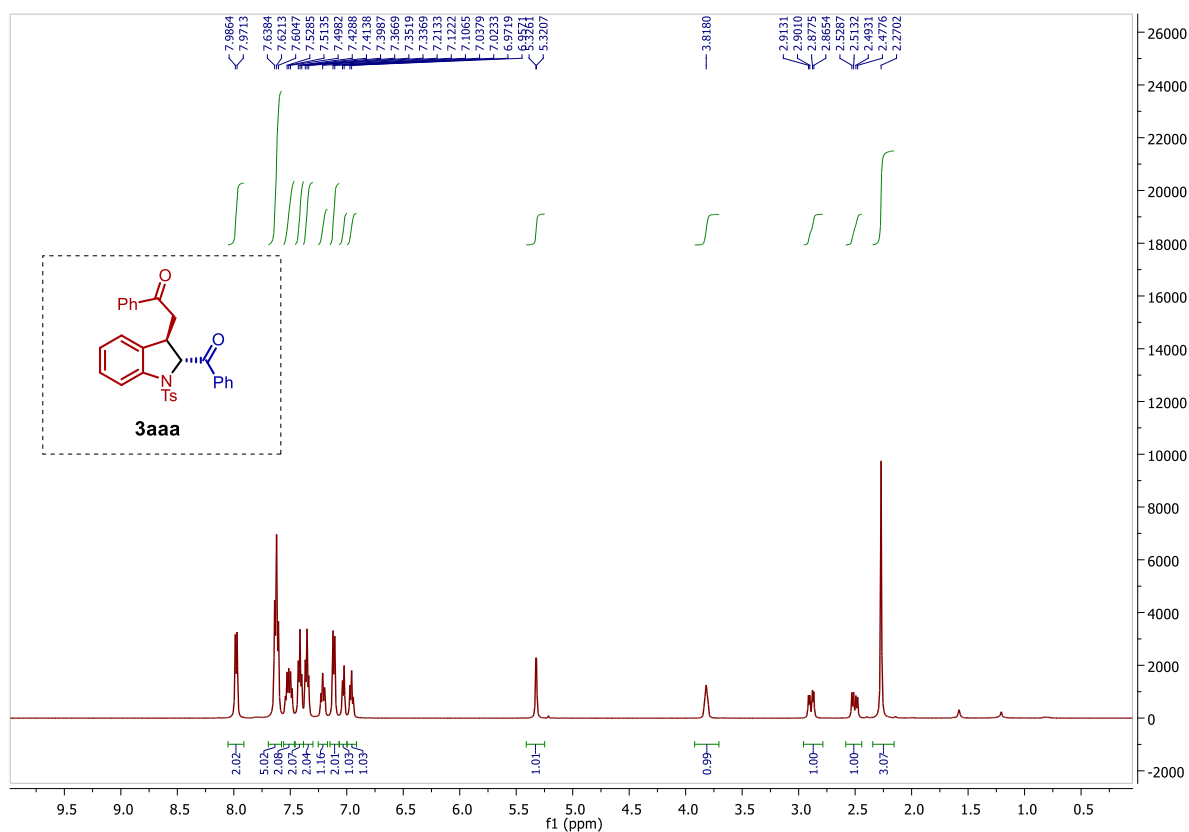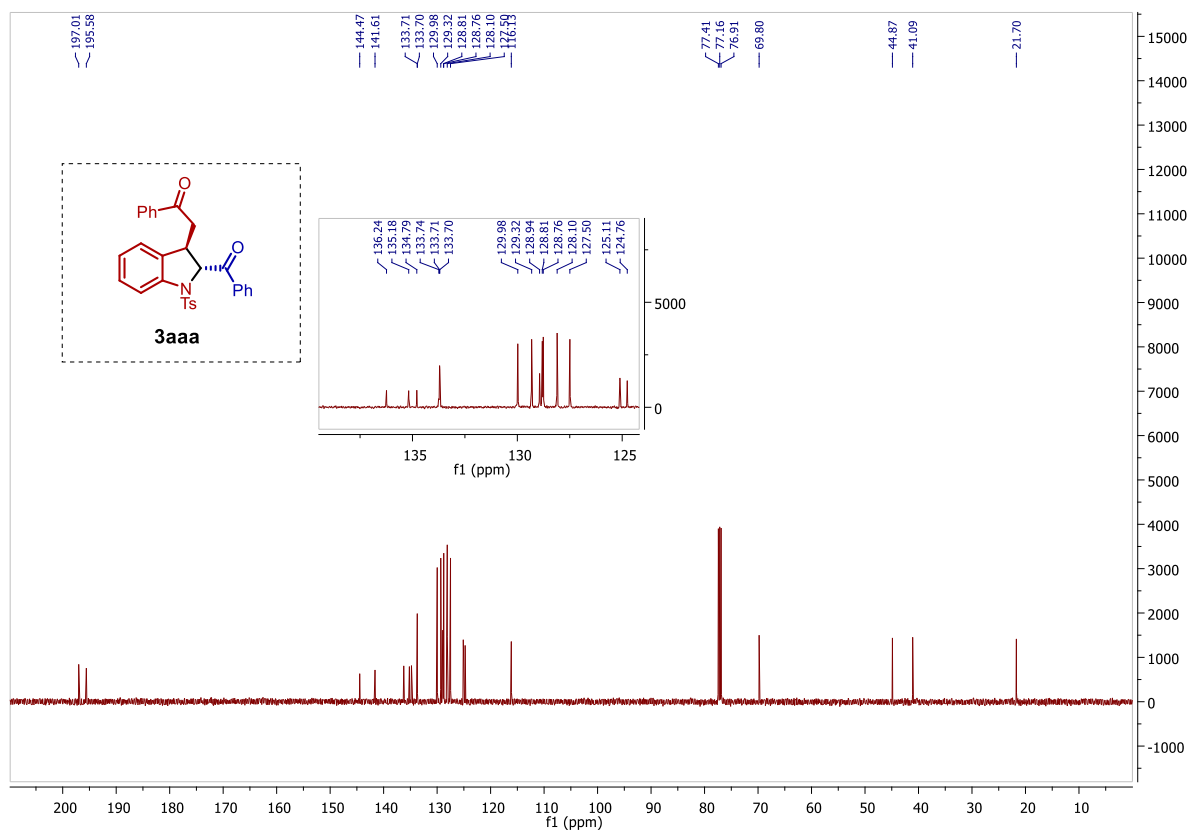

$\text{CDCl}_3$ , 500 MHz  $^1\text{H}$  NMR and 125 MHz  $^{13}\text{C}\{^1\text{H}\}$  NMR Spectra of **3aaa**

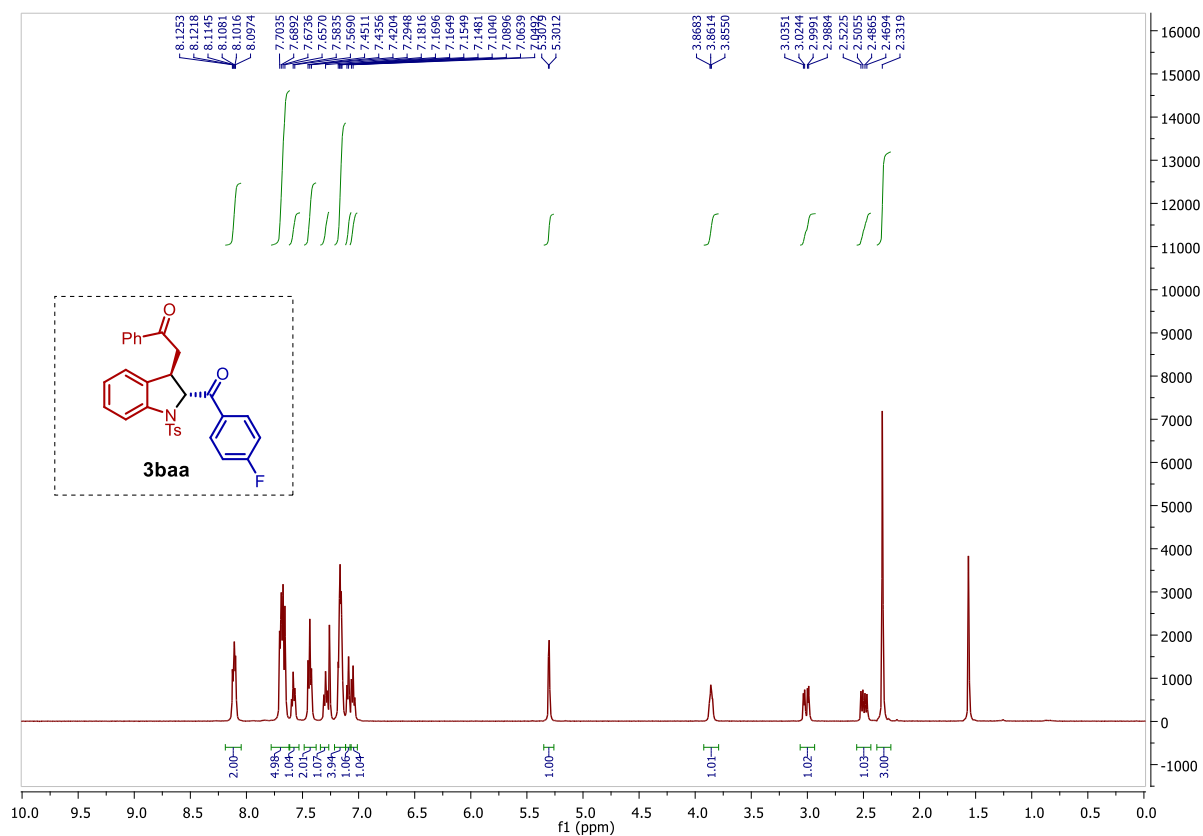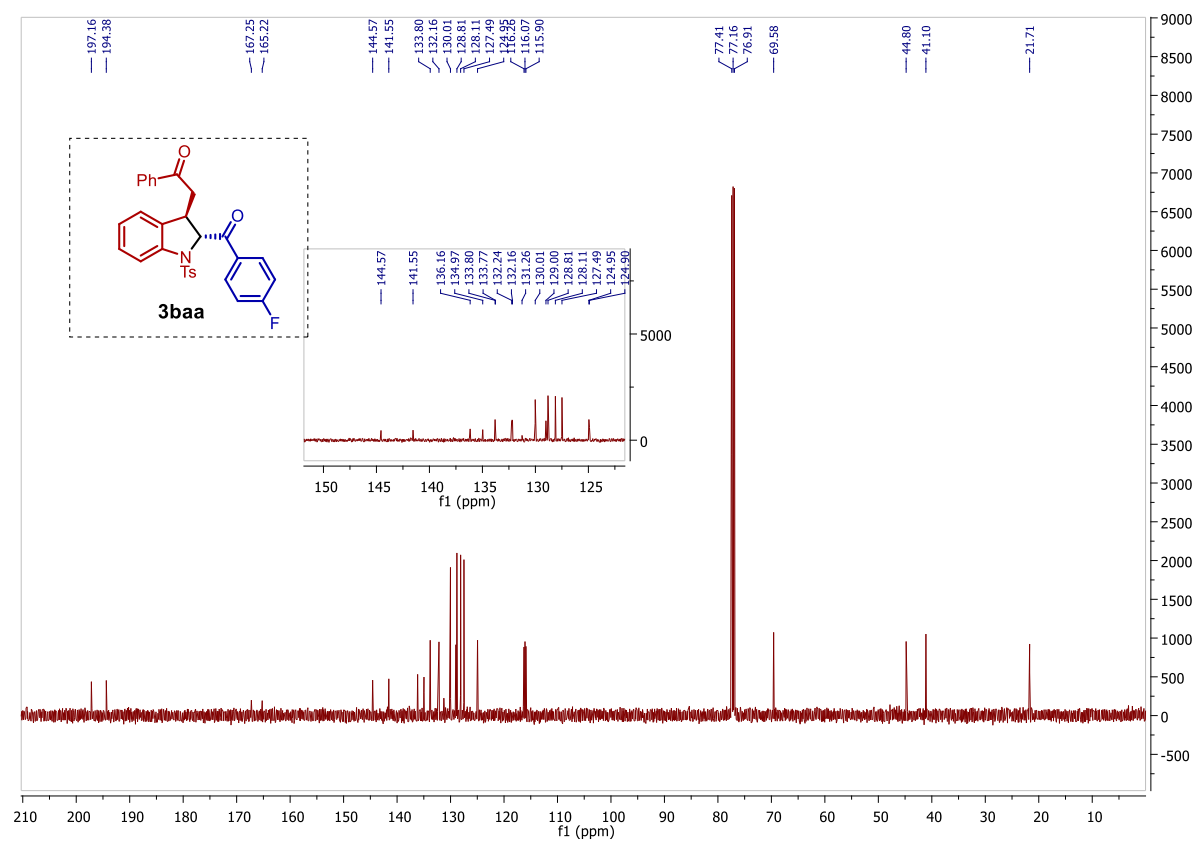

CDCl<sub>3</sub>, 500 MHz <sup>1</sup>H NMR and 125 MHz <sup>13</sup>C{<sup>1</sup>H} NMR Spectra of **3baa**

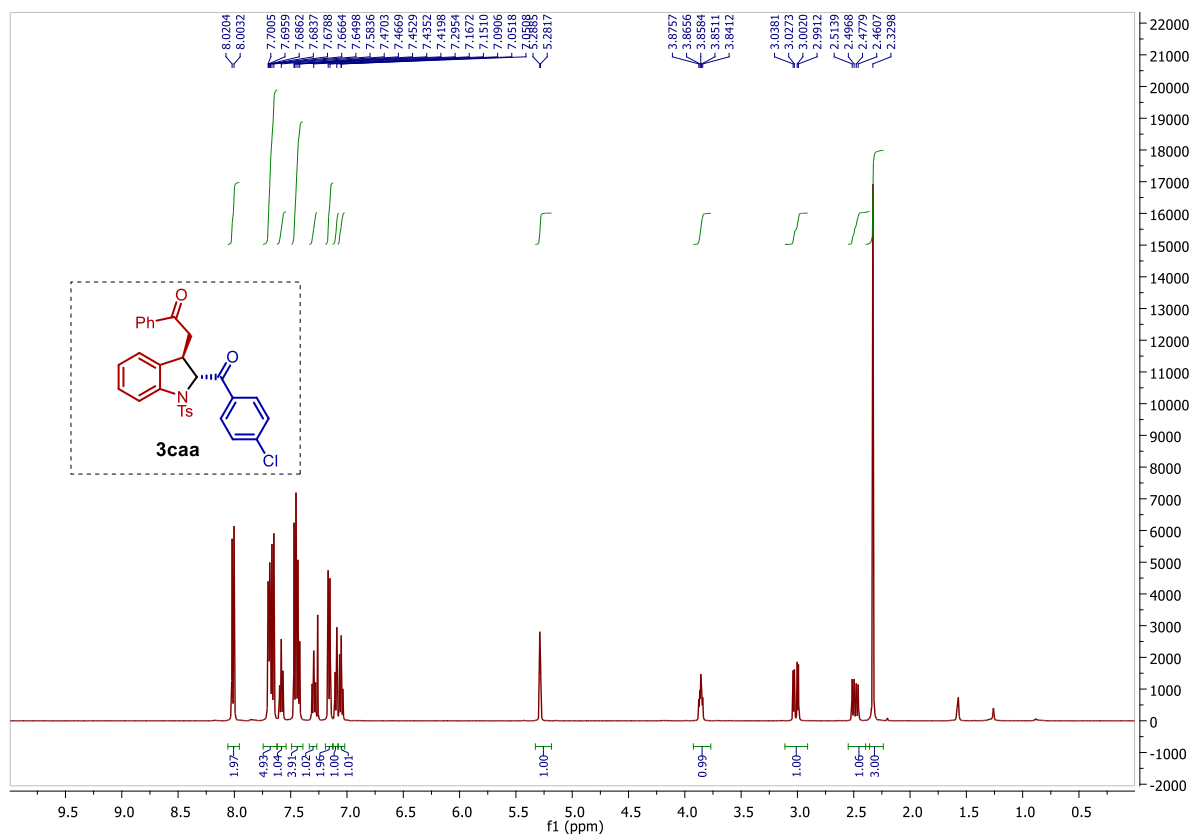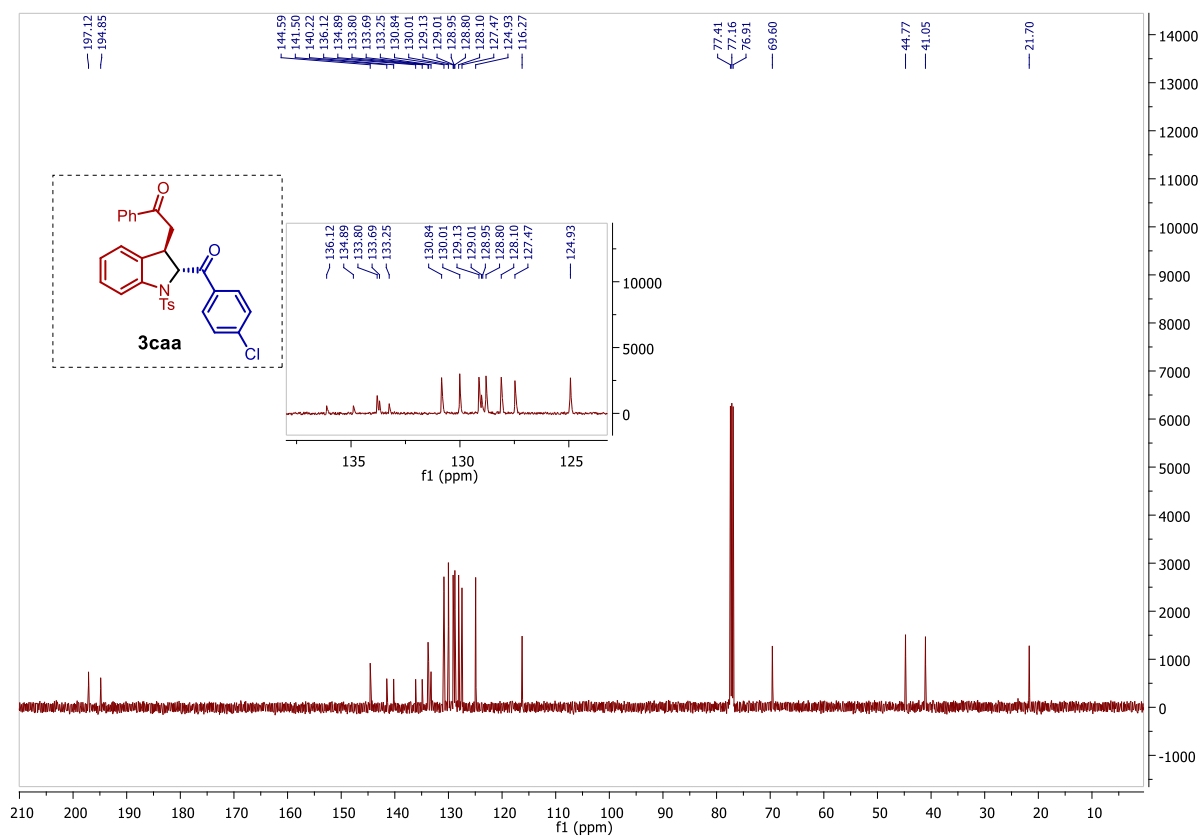



CDCl<sub>3</sub>, 500 MHz <sup>1</sup>H NMR and 125 MHz <sup>13</sup>C{<sup>1</sup>H} NMR Spectra of **3caa**

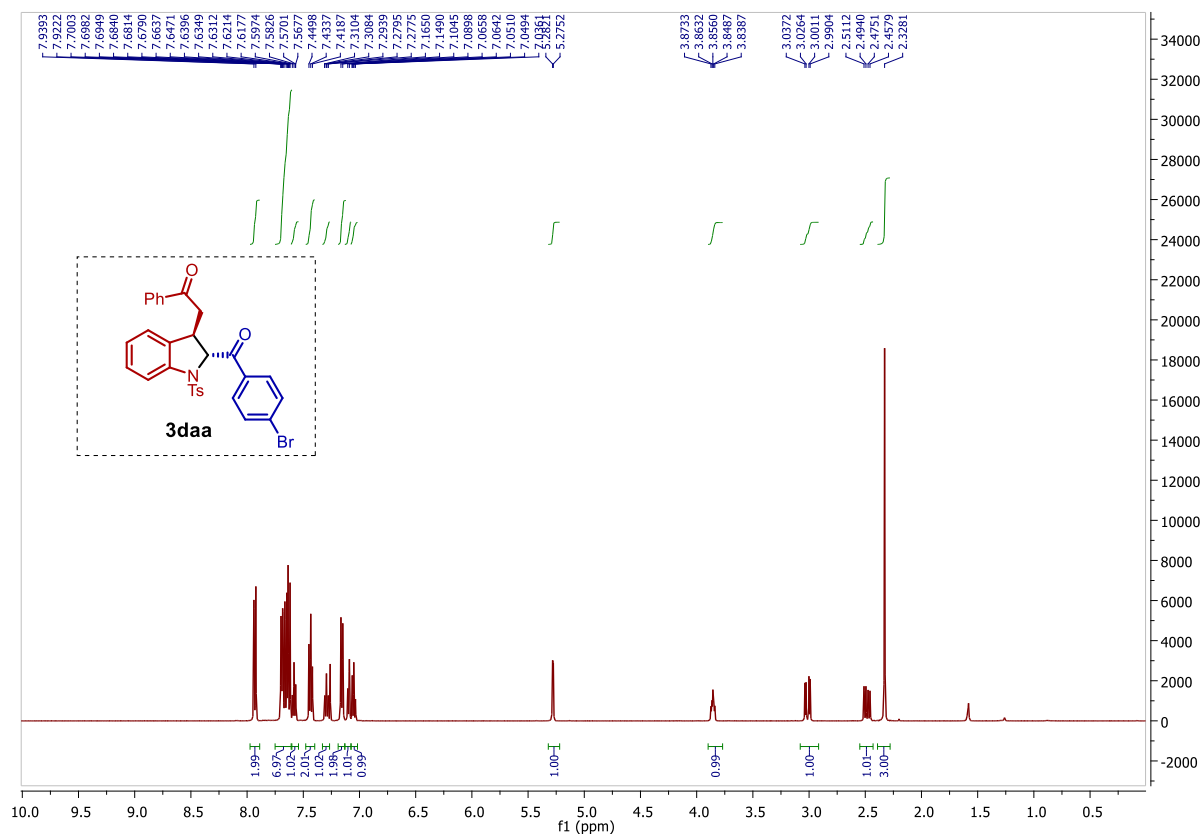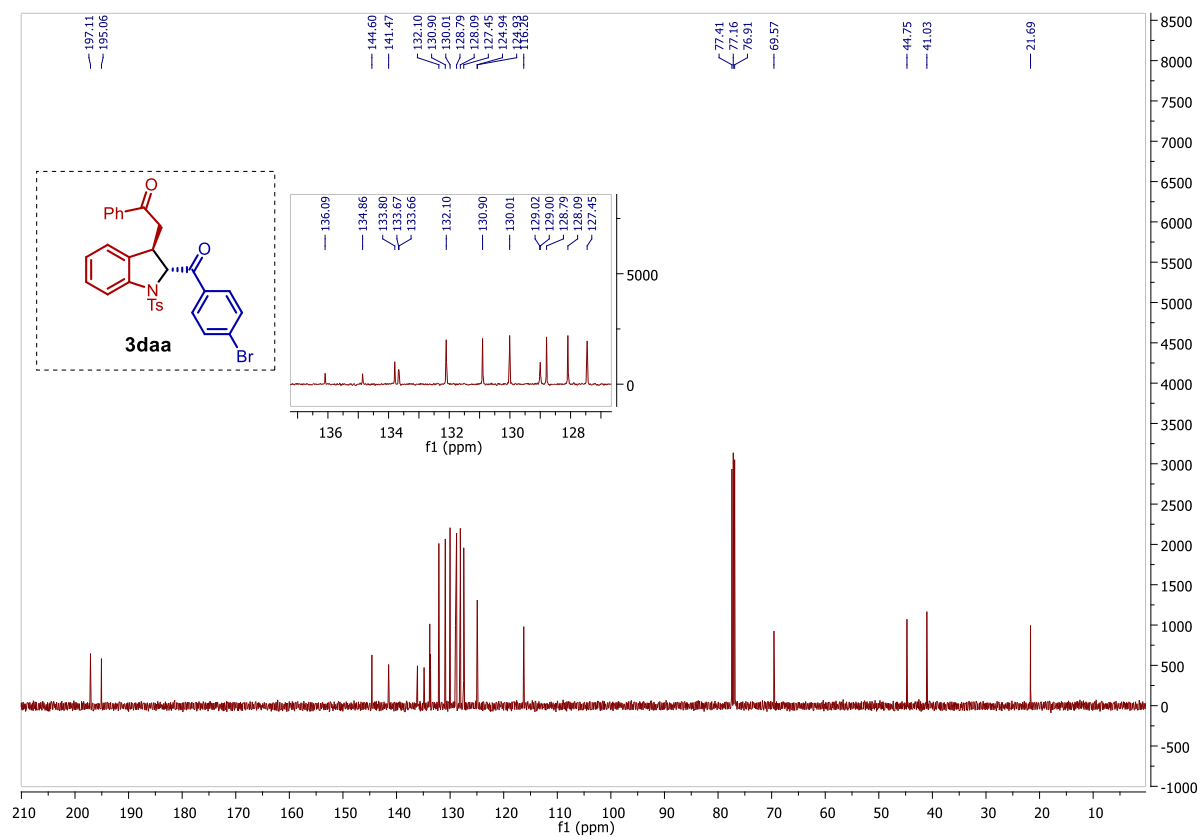

CDCl<sub>3</sub>, 500 MHz <sup>1</sup>H NMR and 125 MHz <sup>13</sup>C{<sup>1</sup>H} NMR Spectra of **3daa**

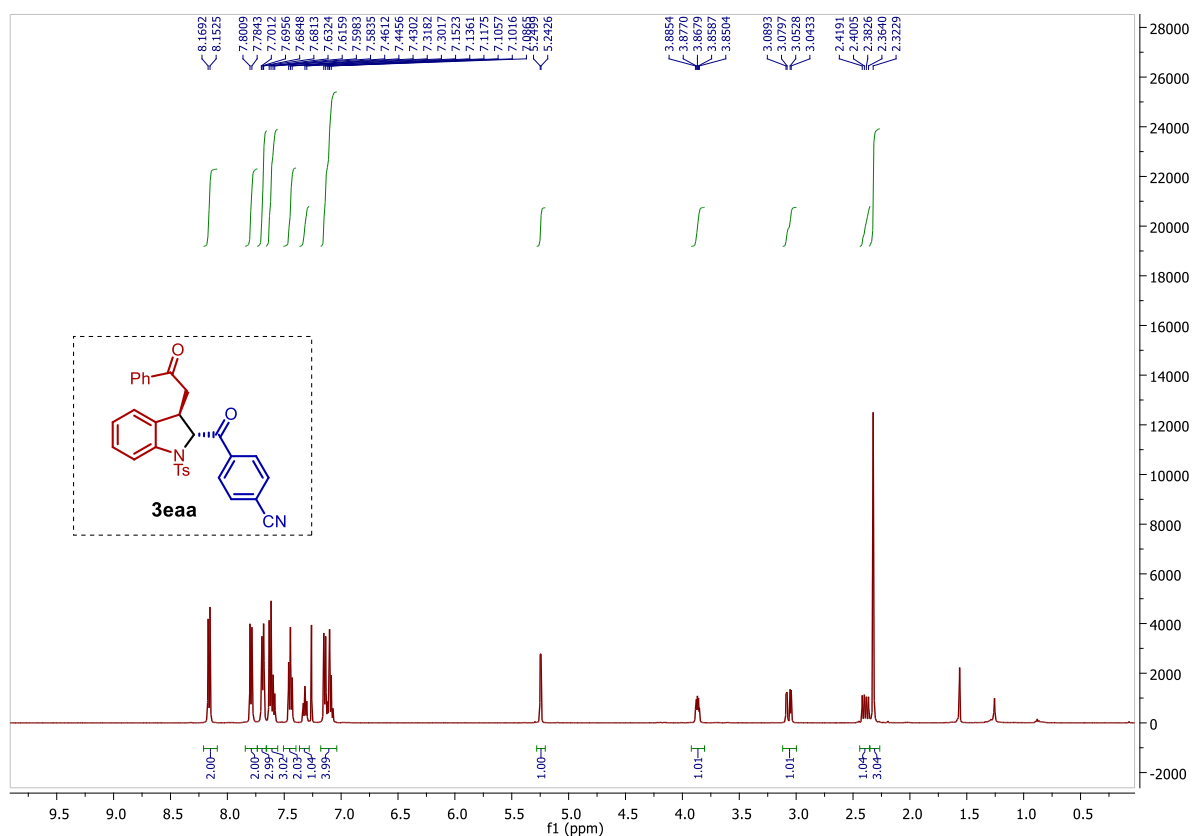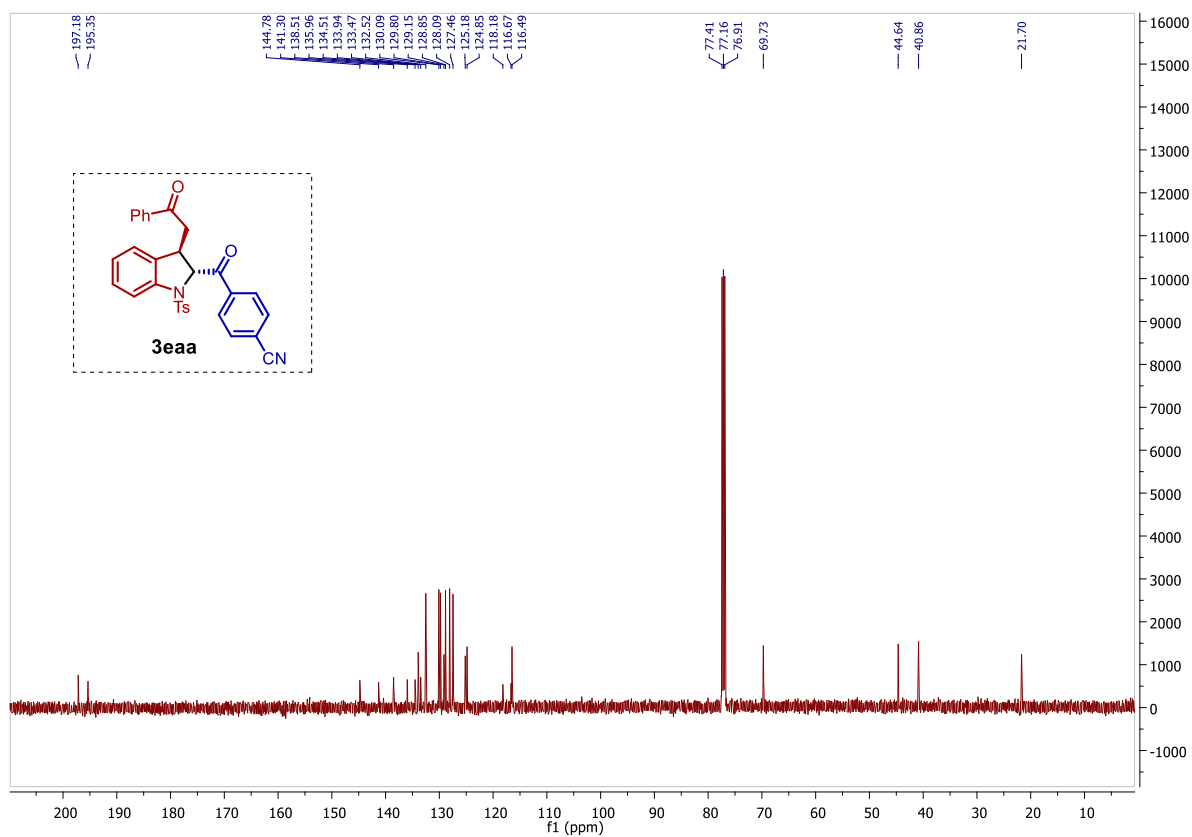

CDCl<sub>3</sub>, 500 MHz <sup>1</sup>H NMR and 125 MHz <sup>13</sup>C{<sup>1</sup>H} NMR Spectra of **3faa**

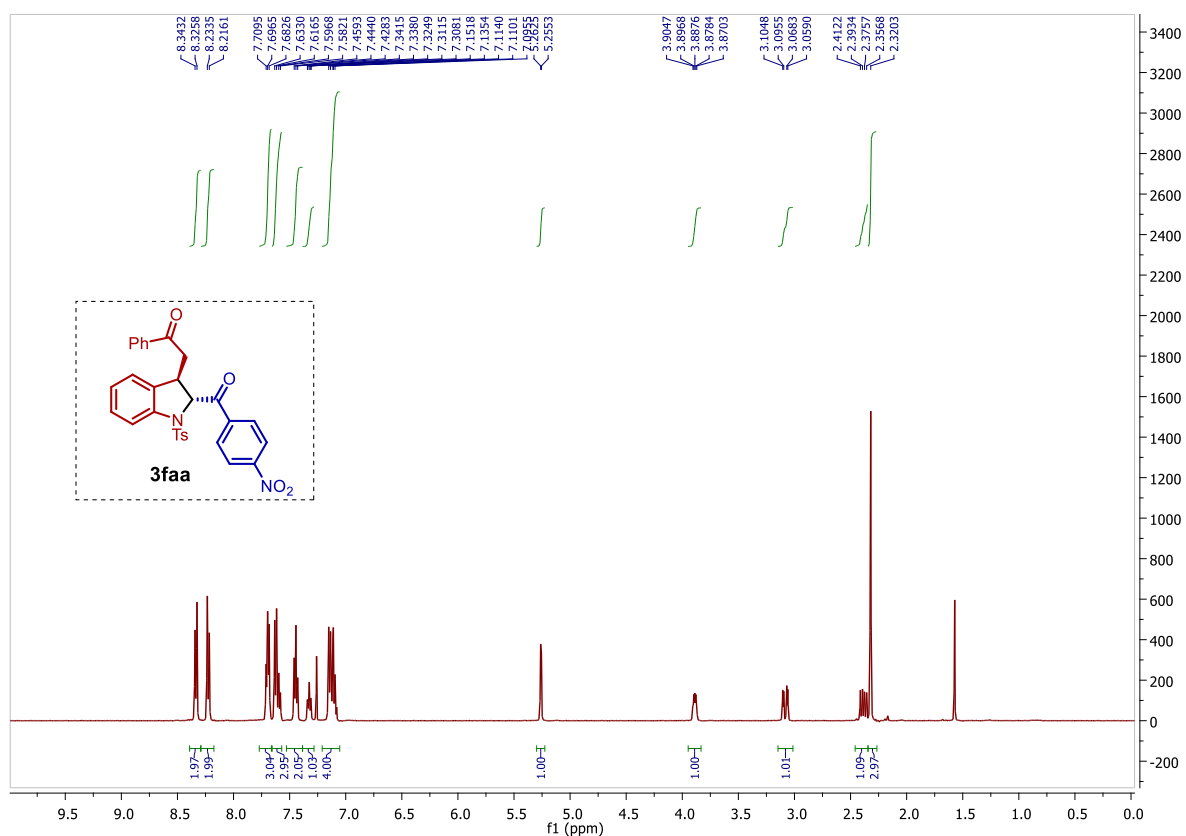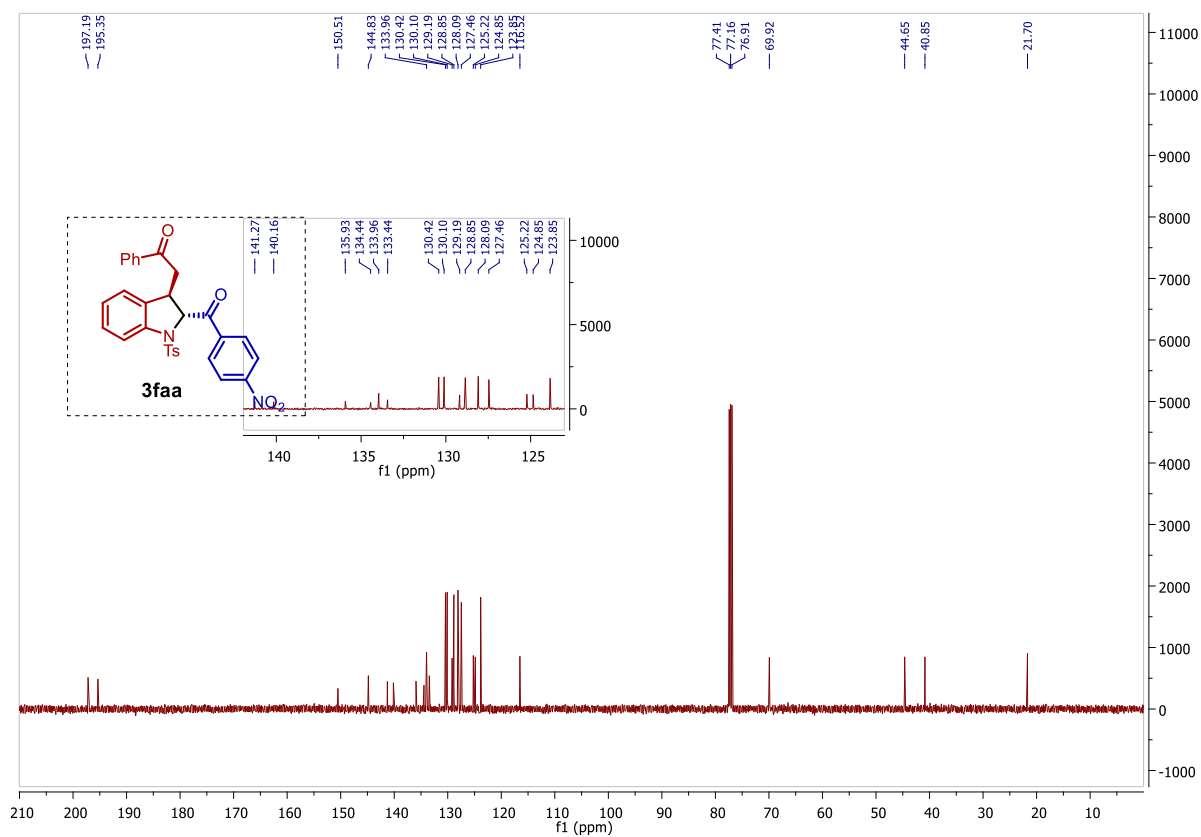

CDCl<sub>3</sub>, 500 MHz <sup>1</sup>H NMR and 125 MHz <sup>13</sup>C{<sup>1</sup>H} NMR Spectra of **3gaa**

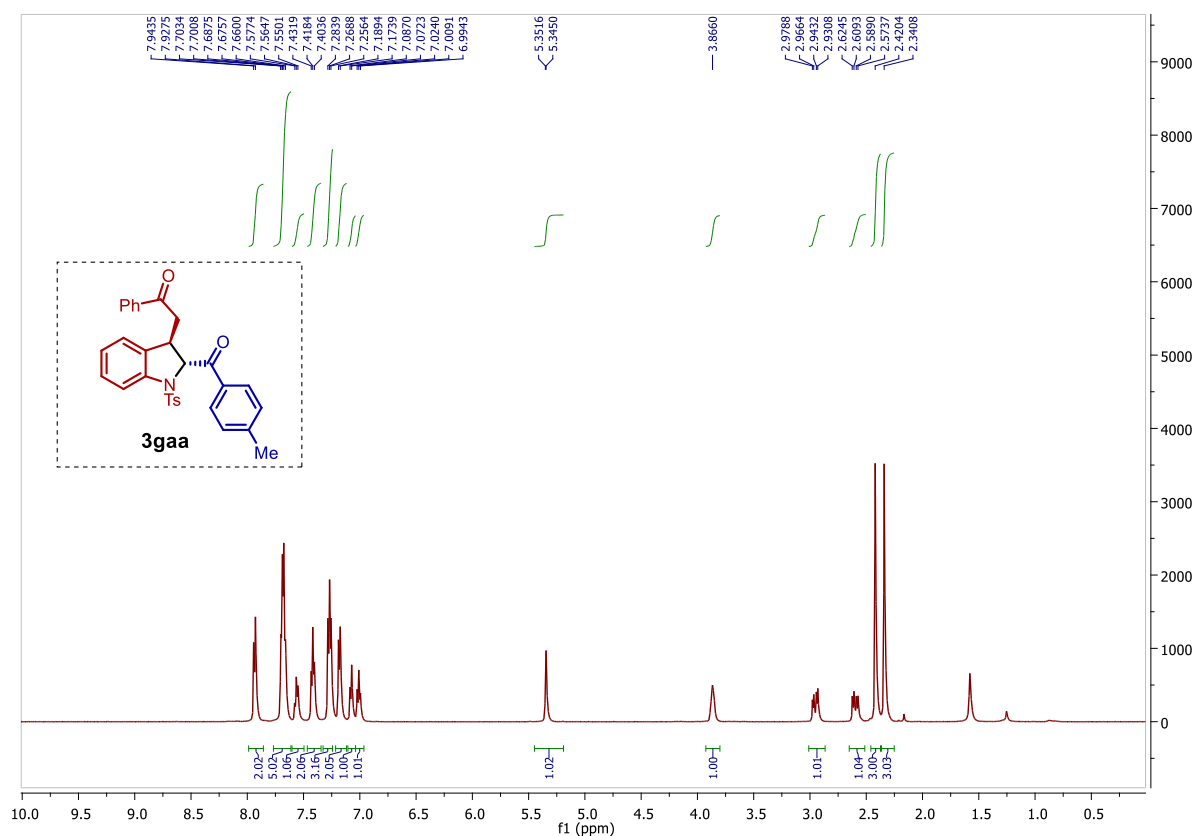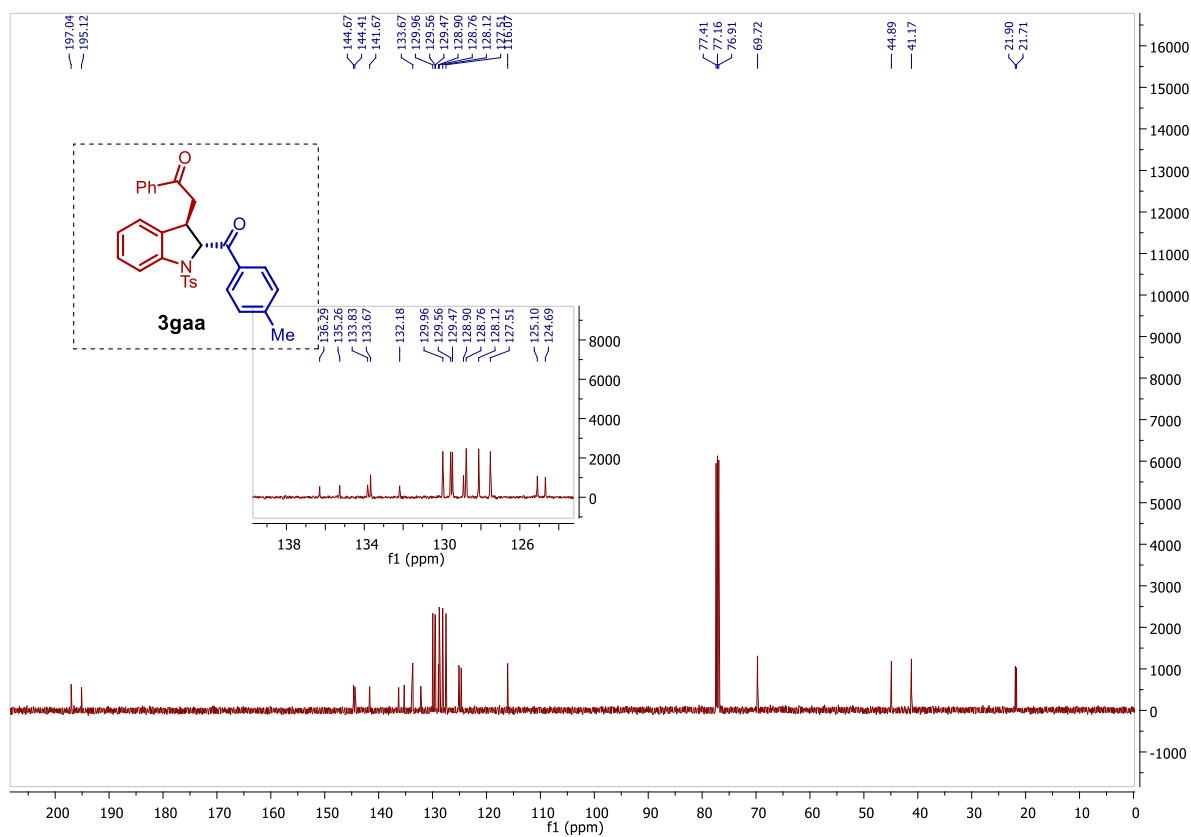

CDCl<sub>3</sub>, 500 MHz <sup>1</sup>H NMR and 125 MHz <sup>13</sup>C{<sup>1</sup>H} NMR Spectra of **3gaa**

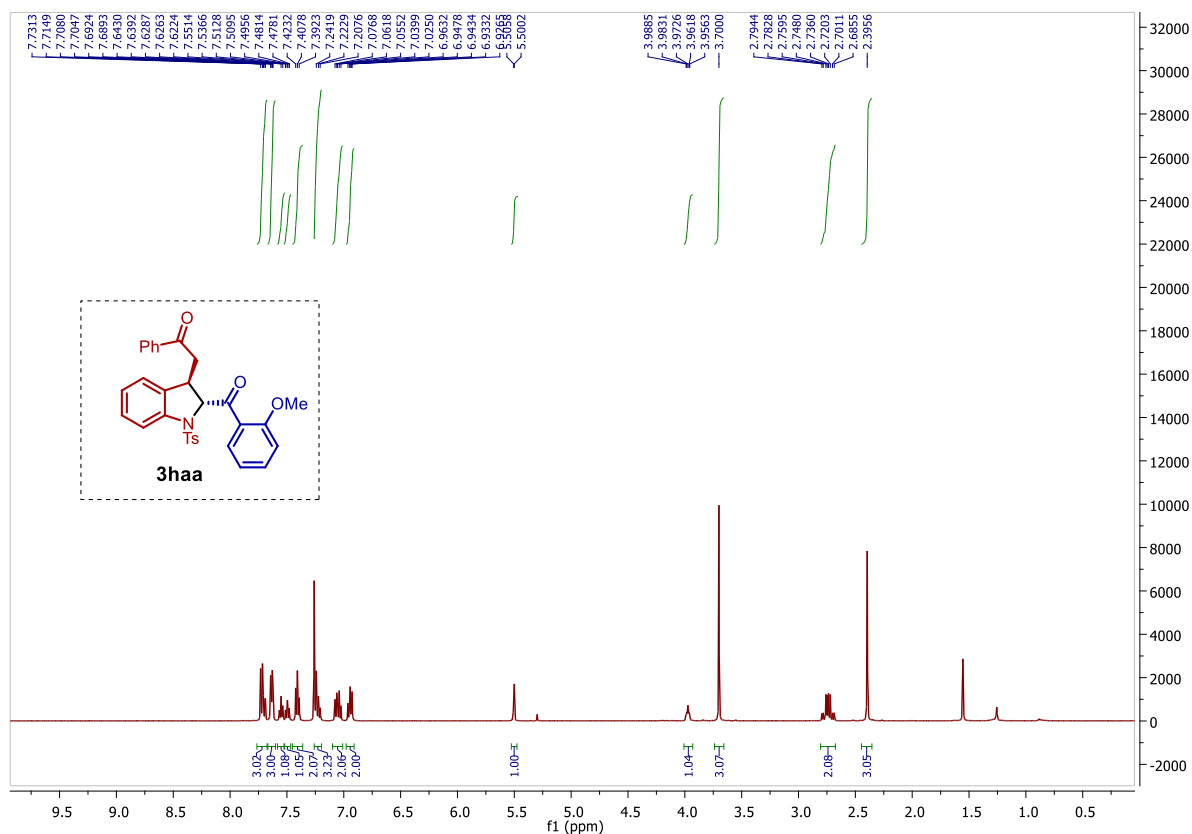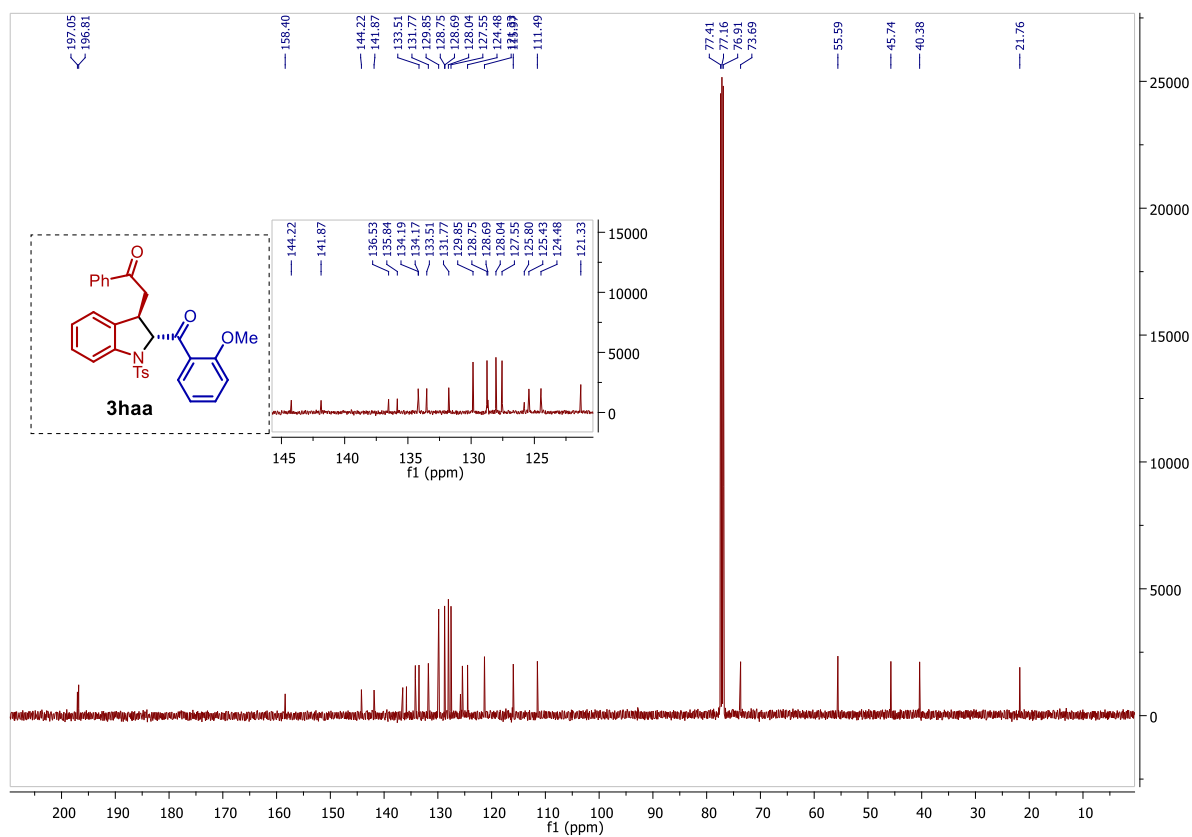

CDCl<sub>3</sub>, 500 MHz <sup>1</sup>H NMR and 125 MHz <sup>13</sup>C{<sup>1</sup>H} NMR Spectra of **3haa**

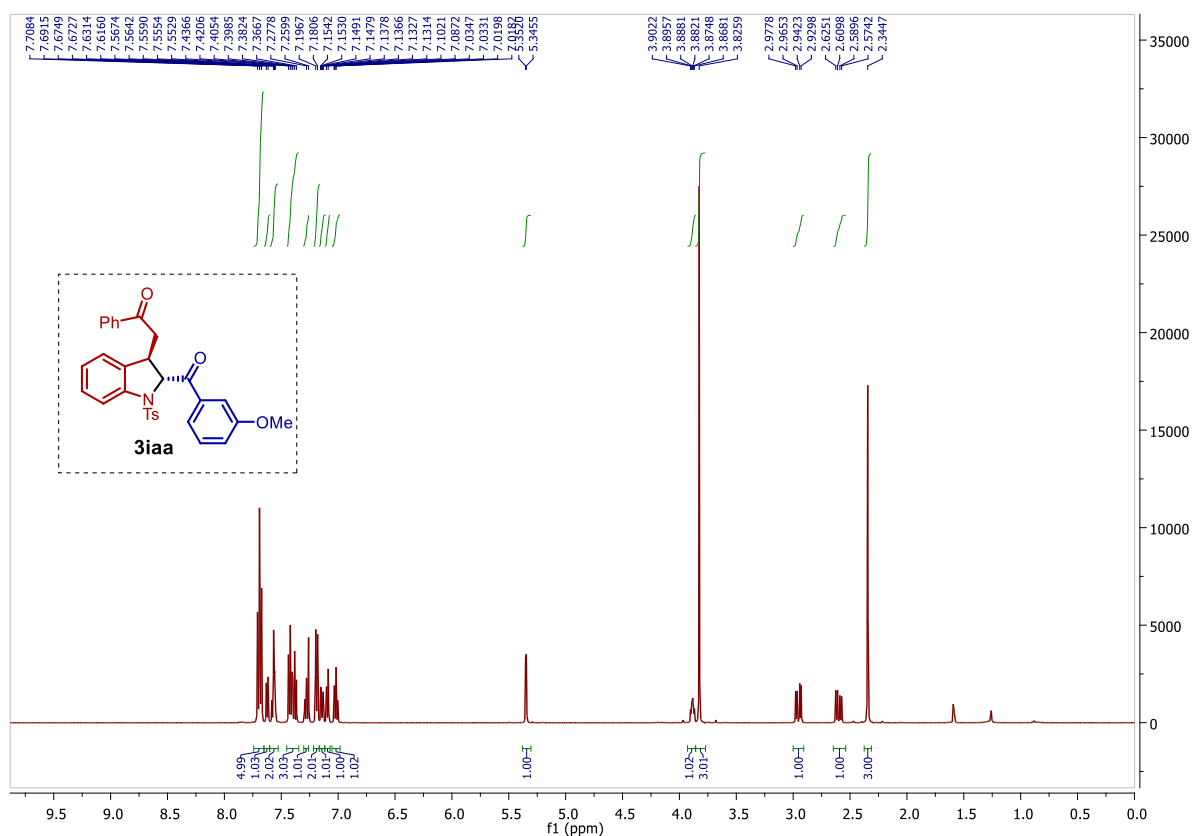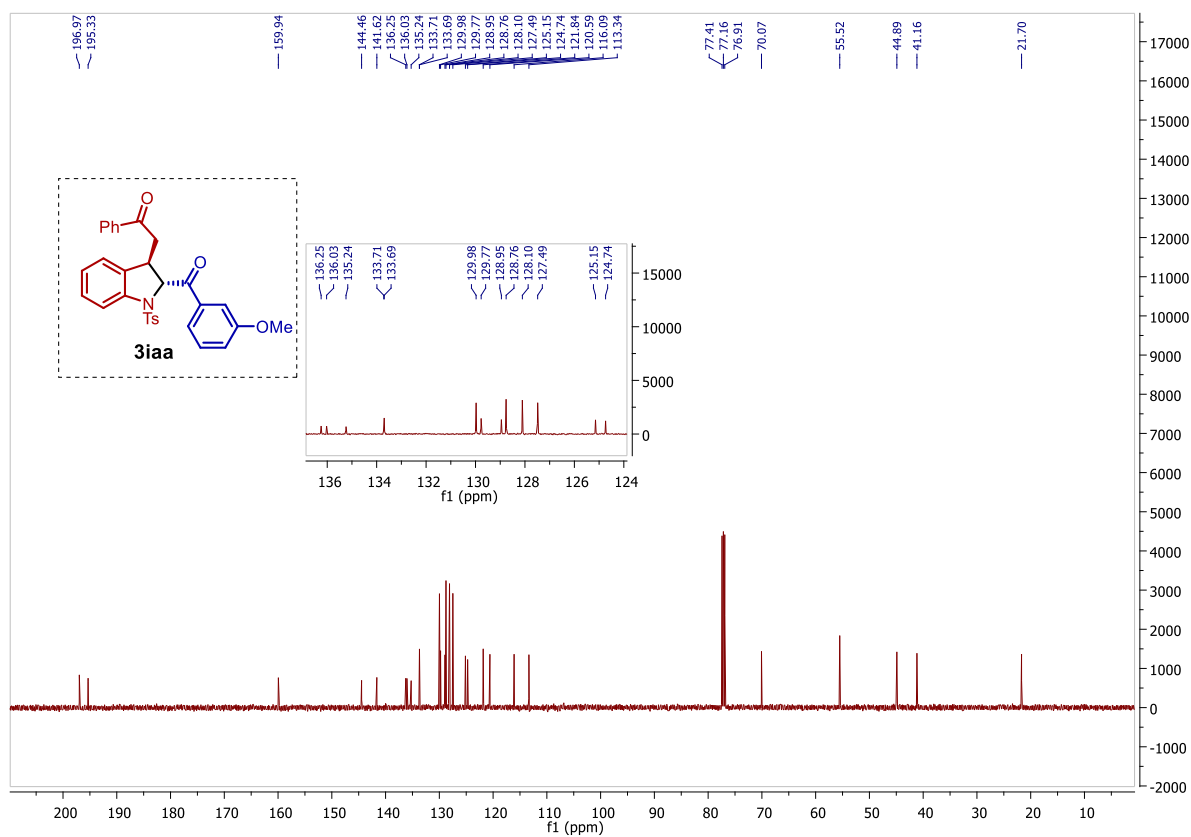

CDCl<sub>3</sub>, 500 MHz <sup>1</sup>H NMR and 125 MHz <sup>13</sup>C{<sup>1</sup>H} NMR Spectra of **3jaa**

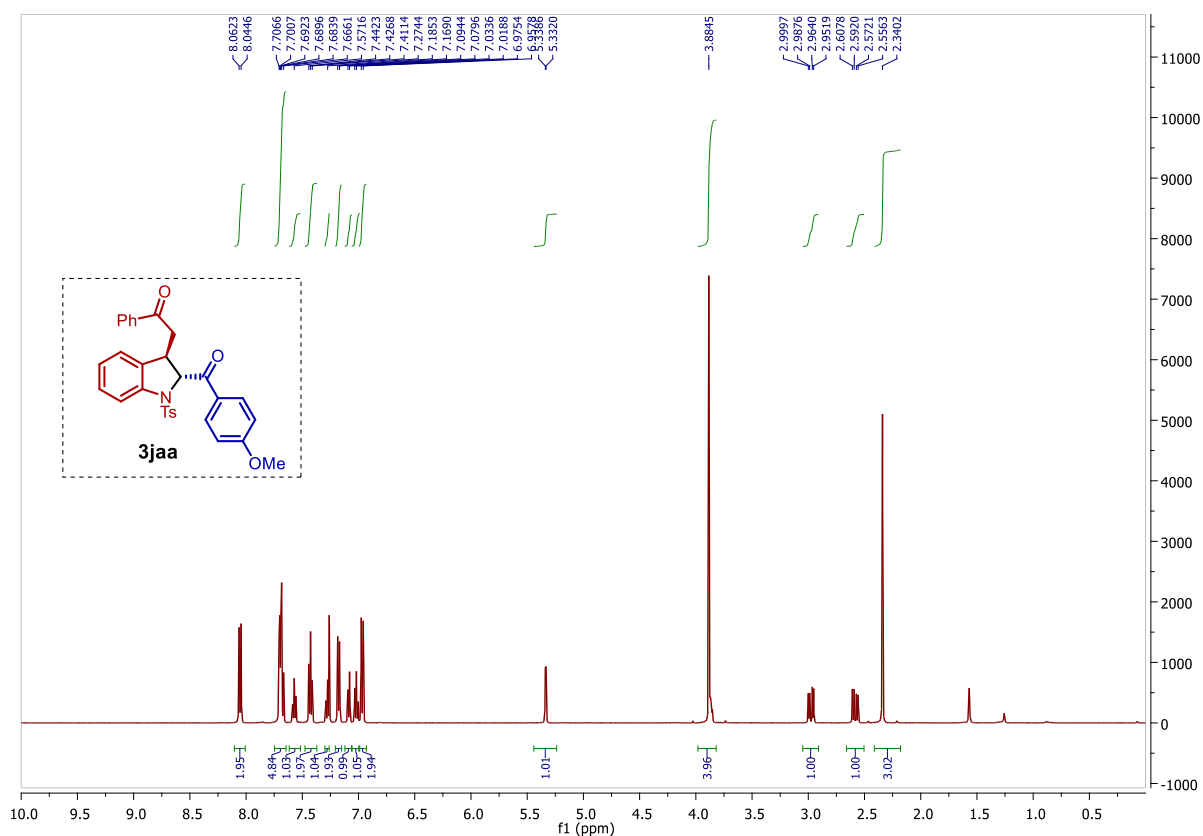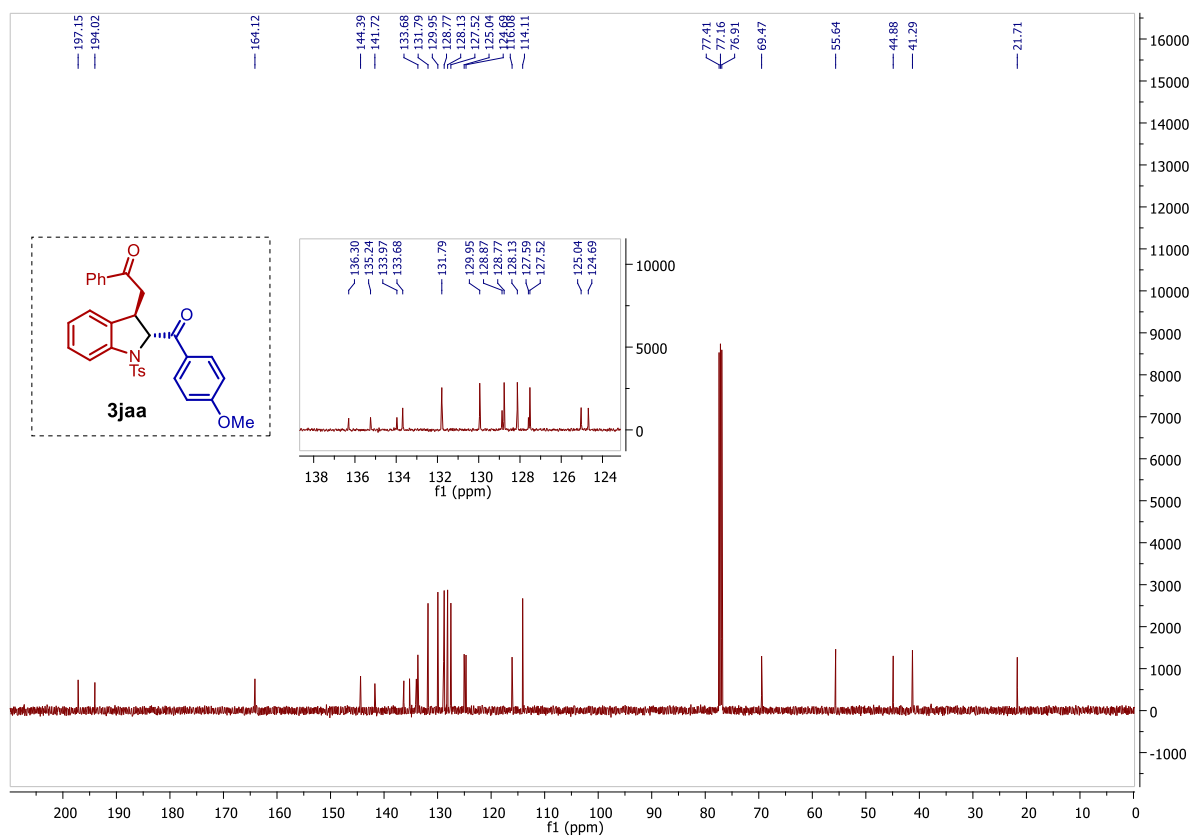

CDCl<sub>3</sub>, 500 MHz <sup>1</sup>H NMR and 125 MHz <sup>13</sup>C{<sup>1</sup>H} NMR Spectra of **3jaa**

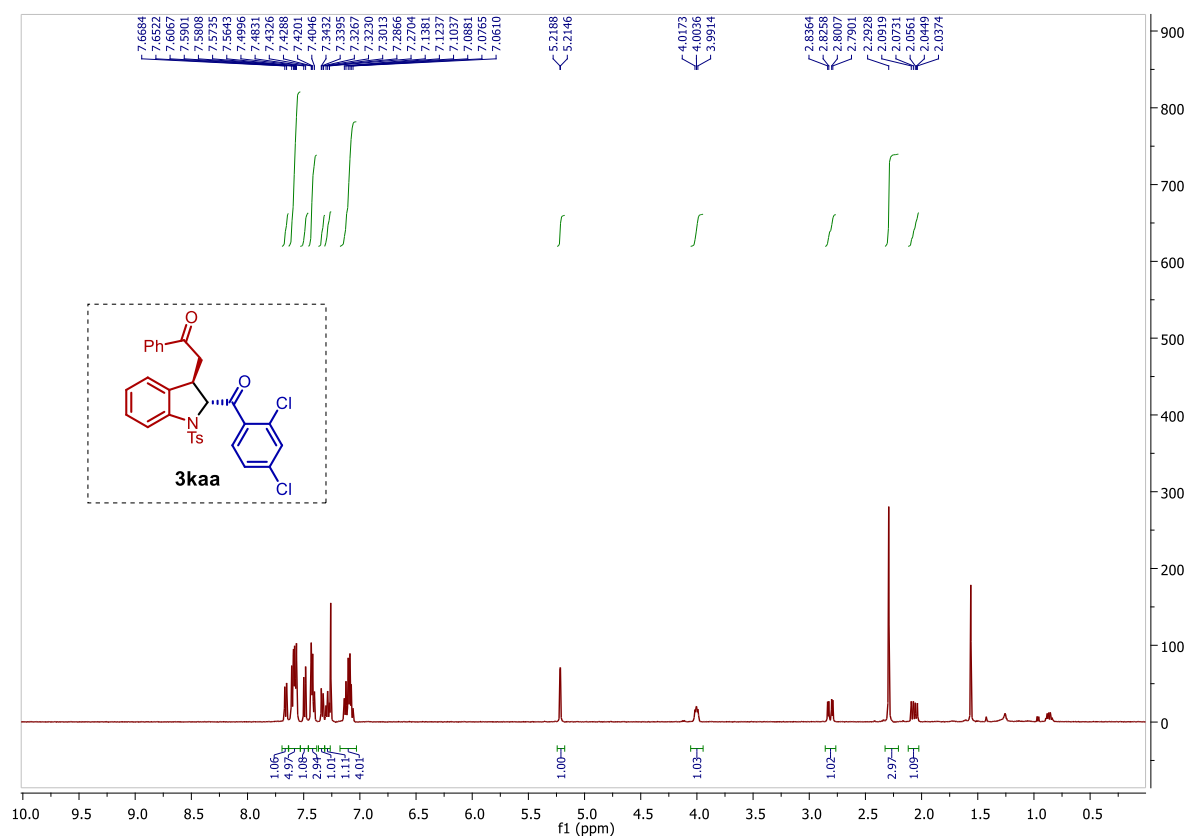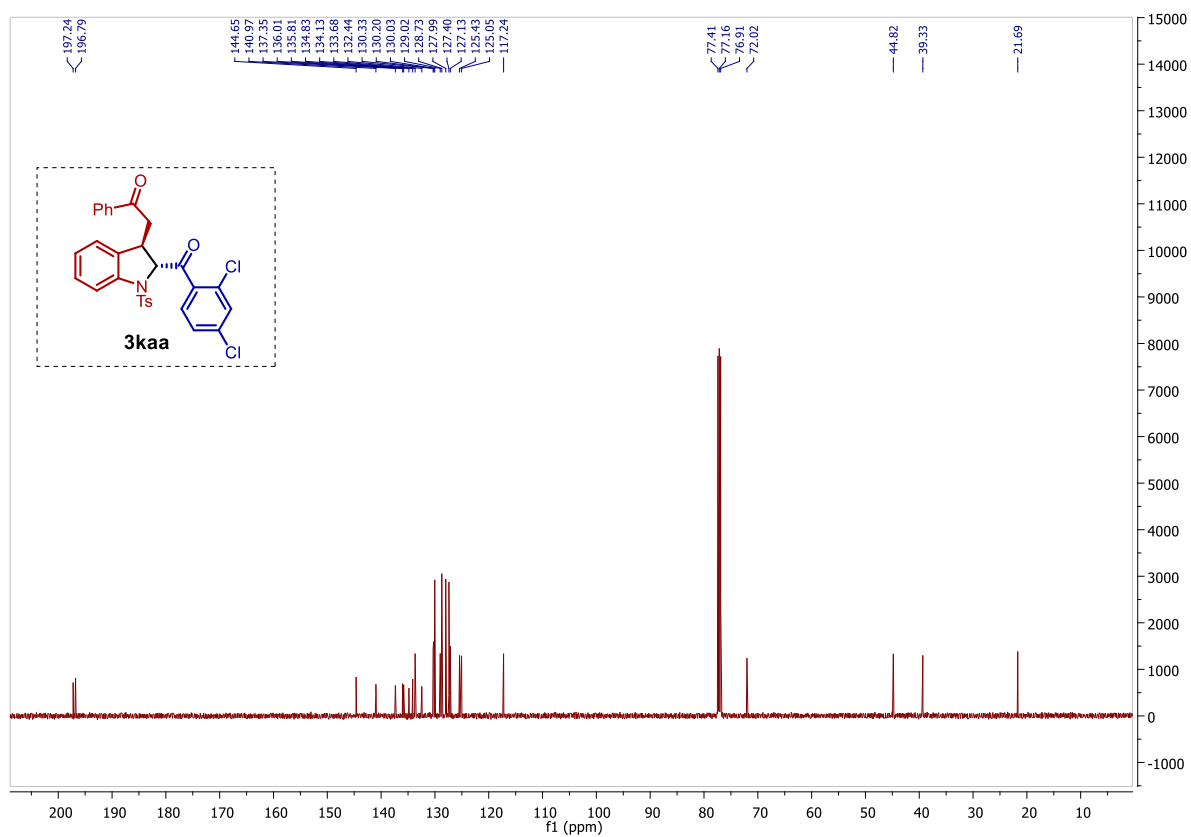

CDCl<sub>3</sub>, 500 MHz <sup>1</sup>H NMR and 125 MHz <sup>13</sup>C{<sup>1</sup>H} NMR Spectra of **3kaa**



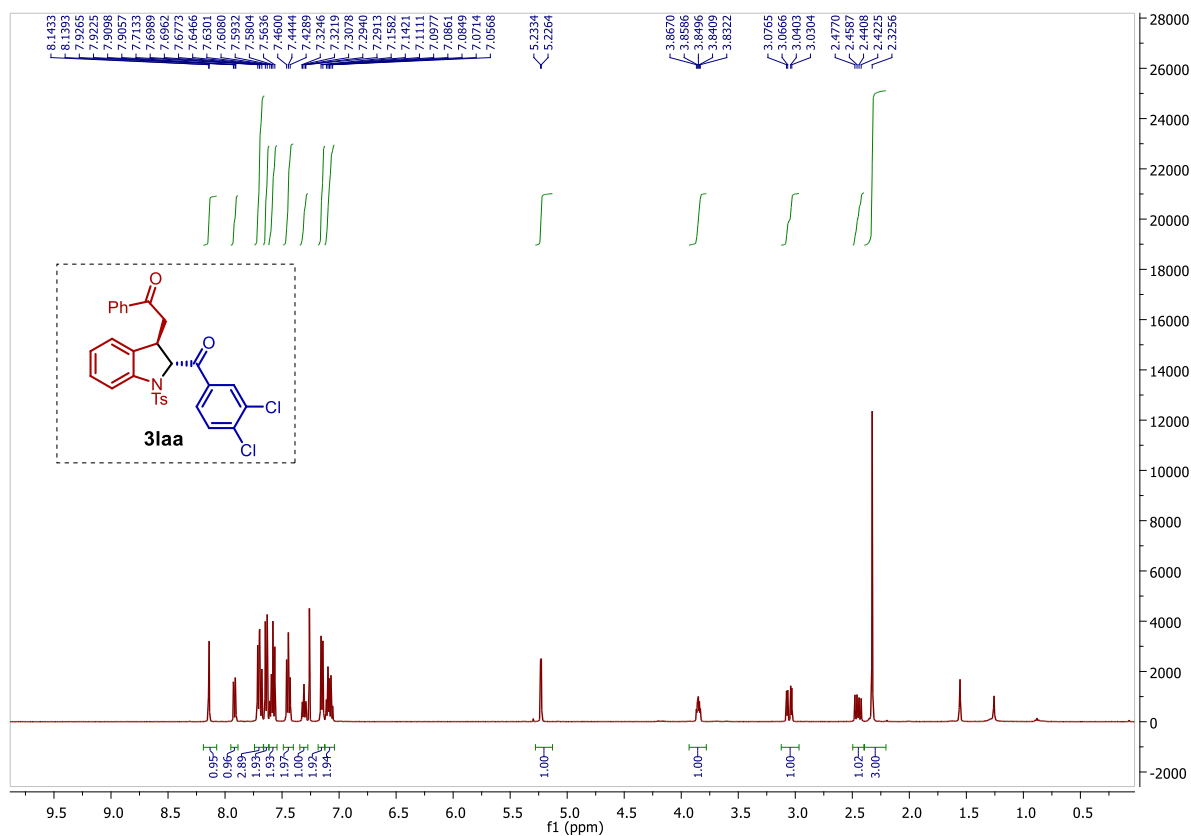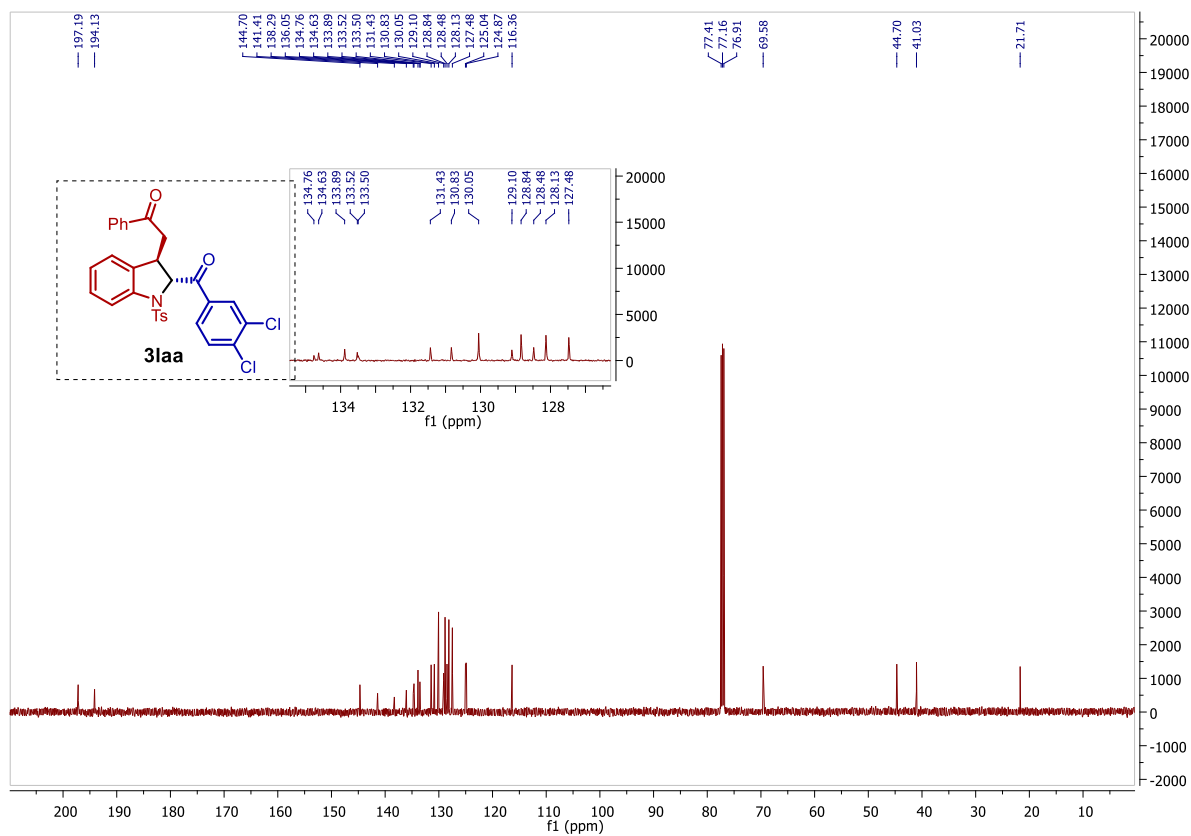

CDCl<sub>3</sub>, 500 MHz <sup>1</sup>H NMR and 125 MHz <sup>13</sup>C{<sup>1</sup>H} NMR Spectra of 3laa

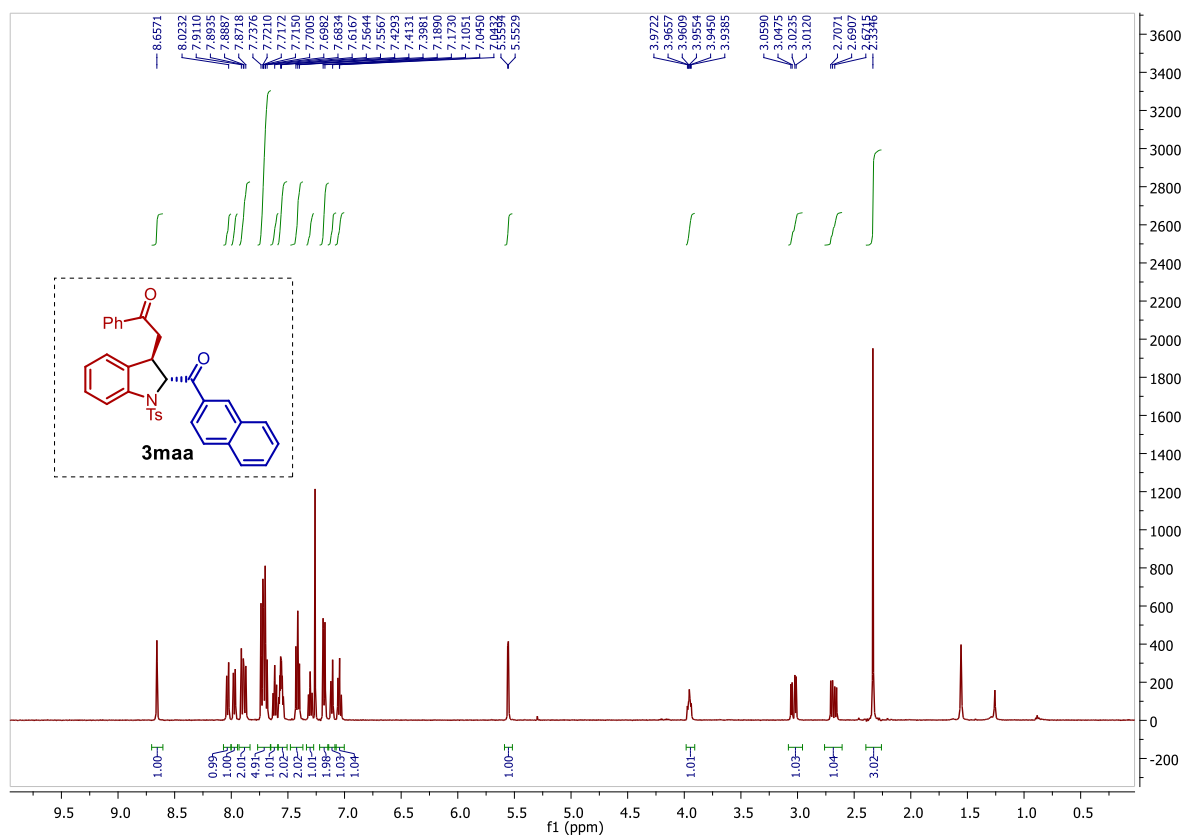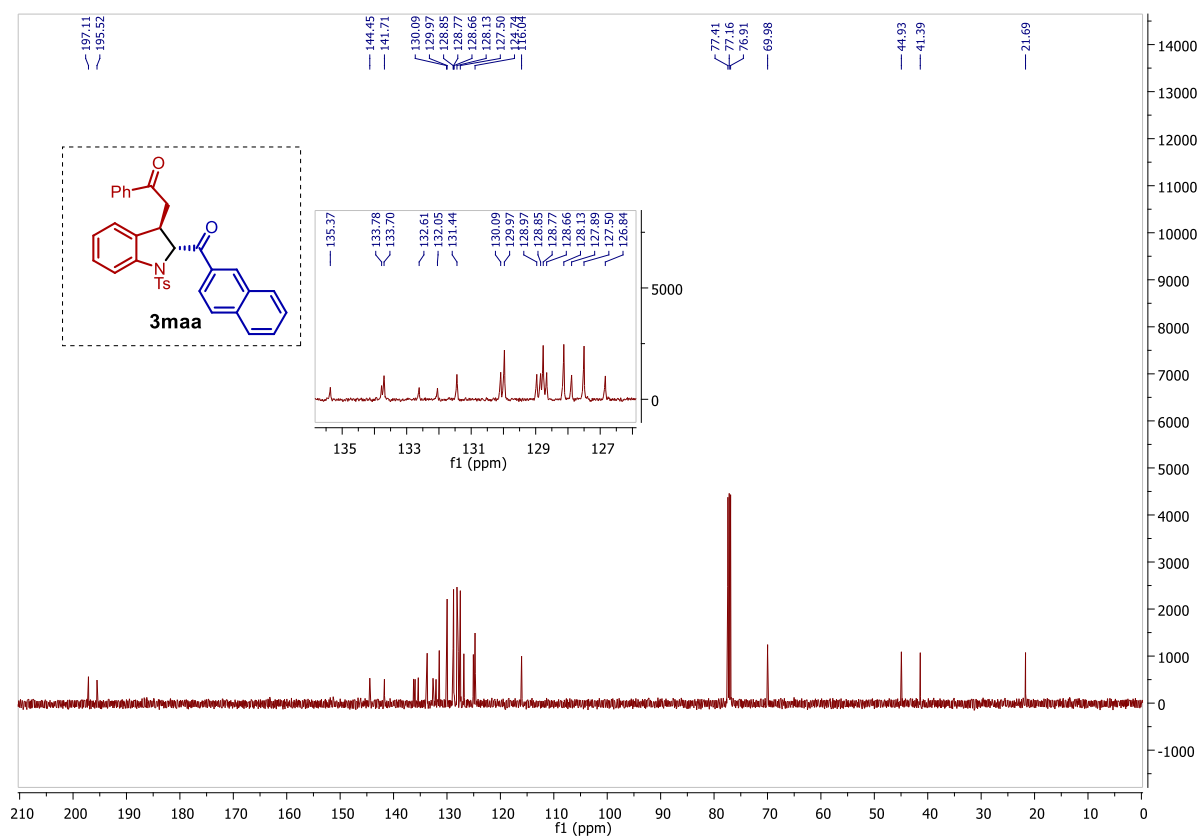

CDCl<sub>3</sub>, 500 MHz <sup>1</sup>H NMR and 125 MHz <sup>13</sup>C{<sup>1</sup>H} NMR Spectra of **3maa**

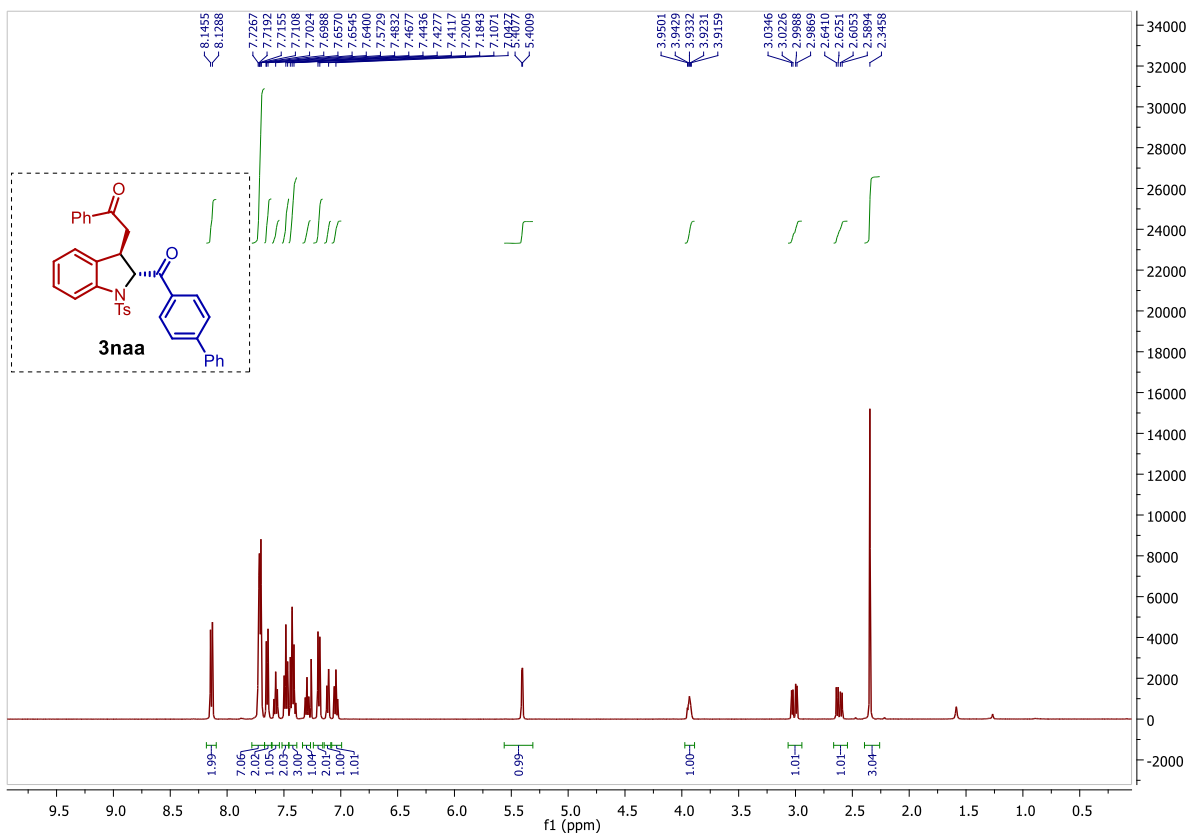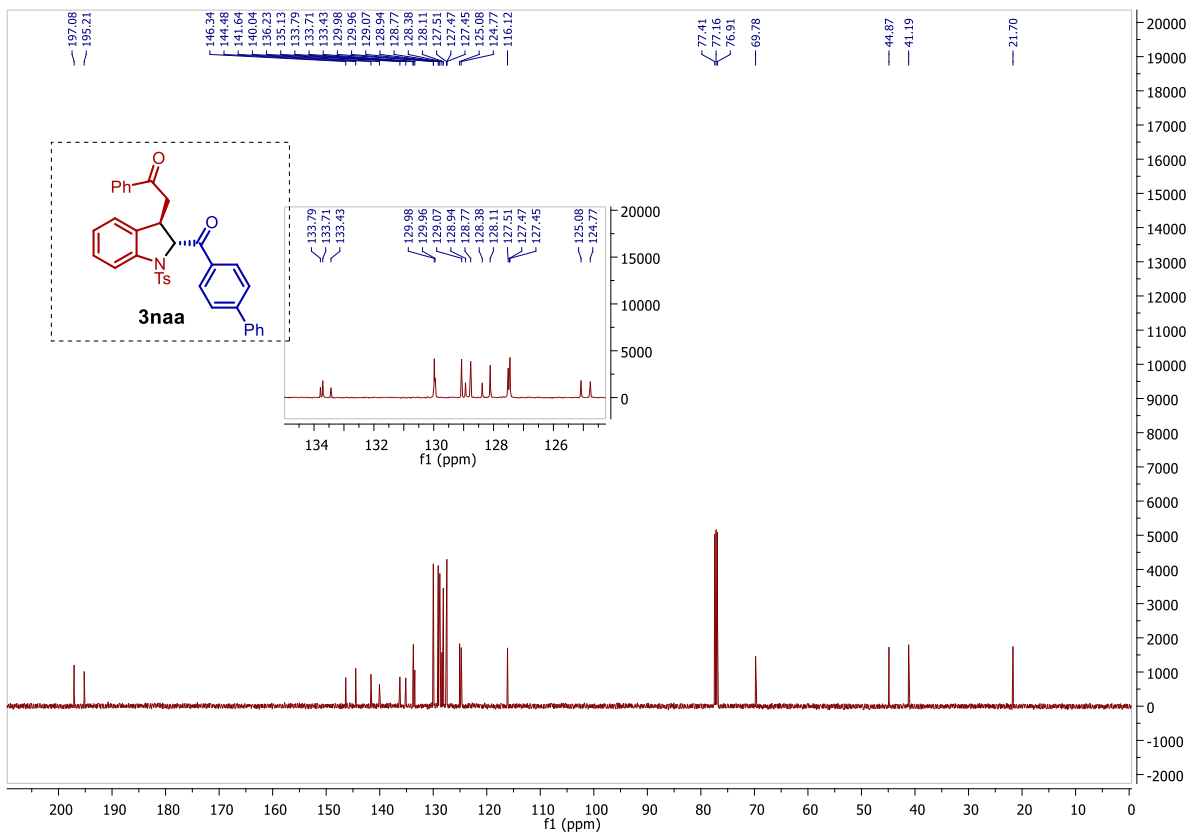

CDCl<sub>3</sub>, 500 MHz <sup>1</sup>H NMR and 125 MHz <sup>13</sup>C{<sup>1</sup>H} NMR Spectra of **3naa**

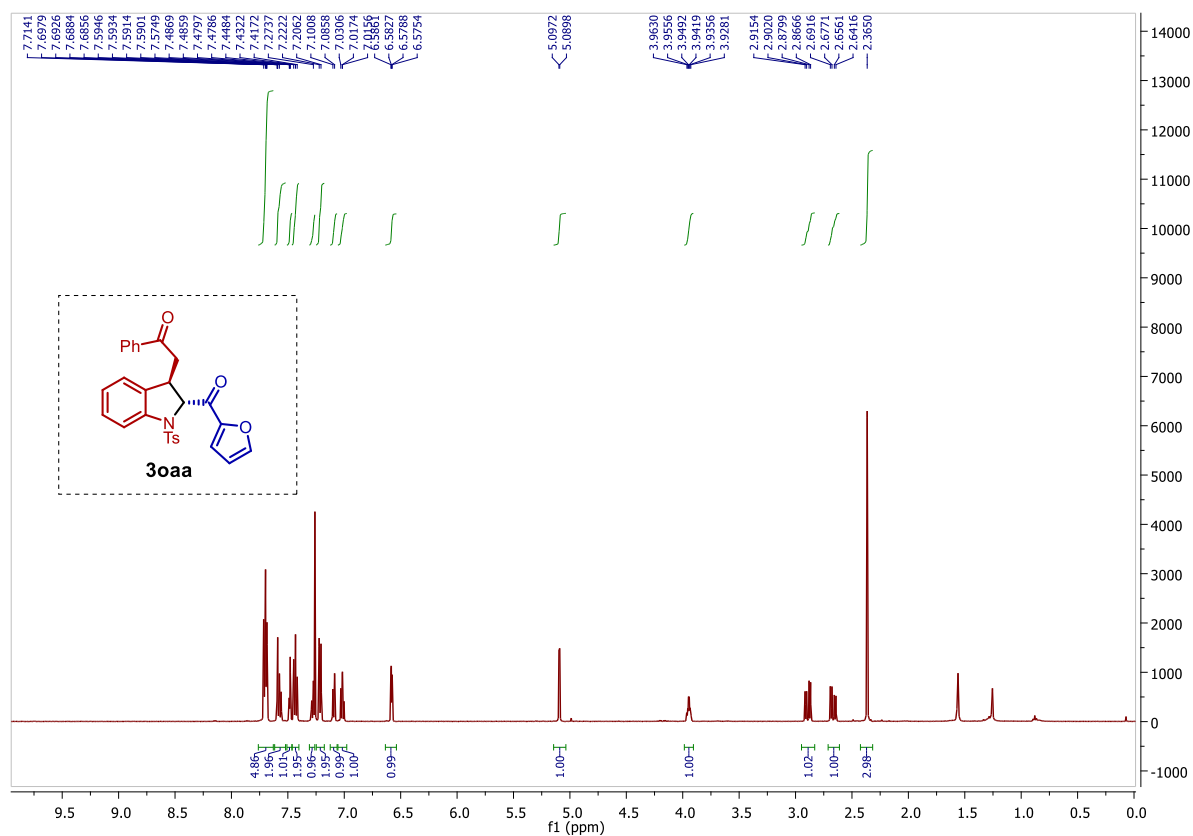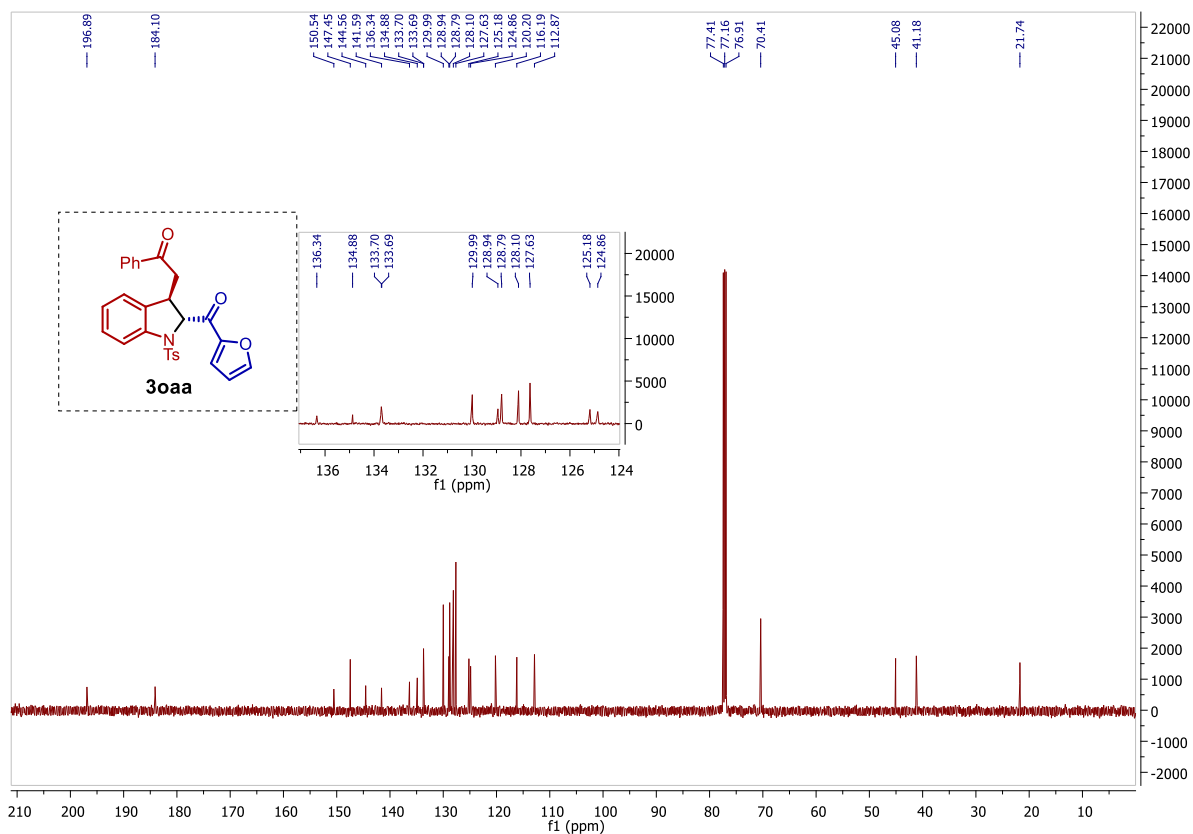

CDCl<sub>3</sub>, 500 MHz <sup>1</sup>H NMR and 125 MHz <sup>13</sup>C{<sup>1</sup>H} NMR Spectra of **3oaa**

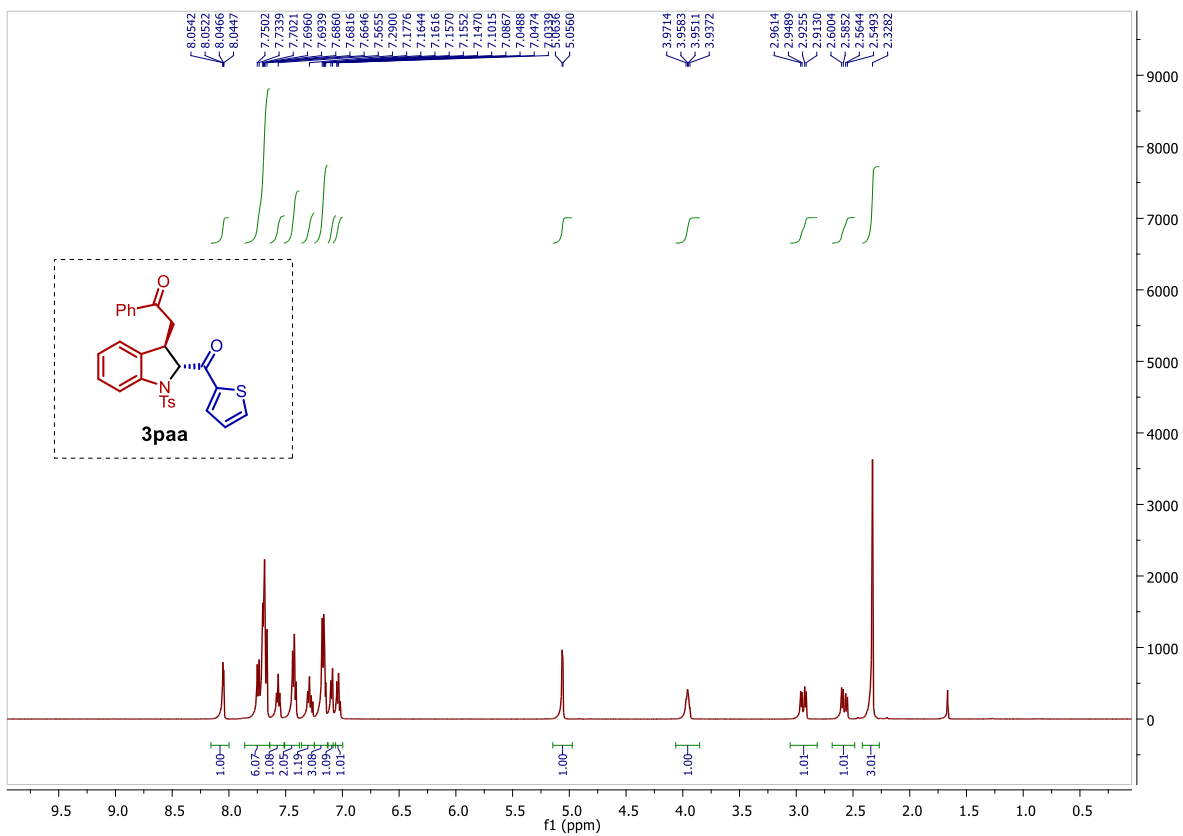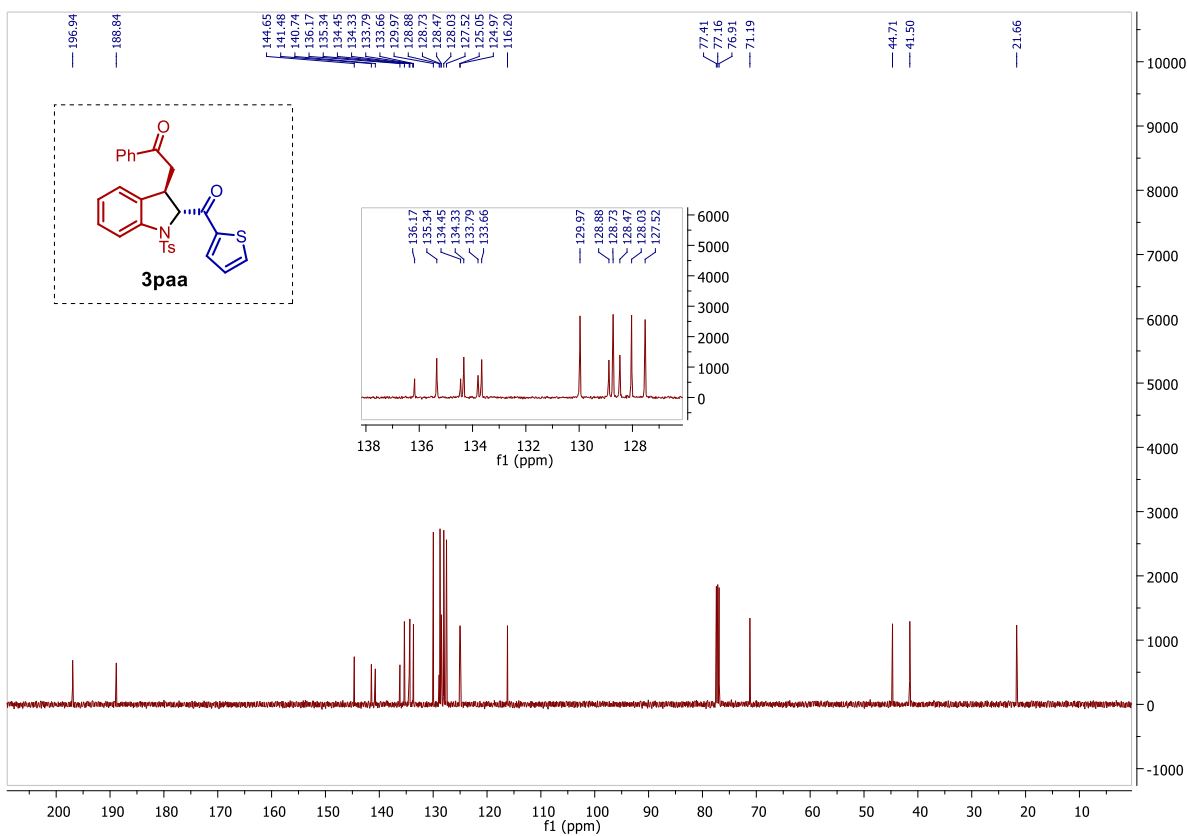

CDCl<sub>3</sub>, 500 MHz <sup>1</sup>H NMR and 125 MHz <sup>13</sup>C{<sup>1</sup>H} NMR Spectra of 3paa

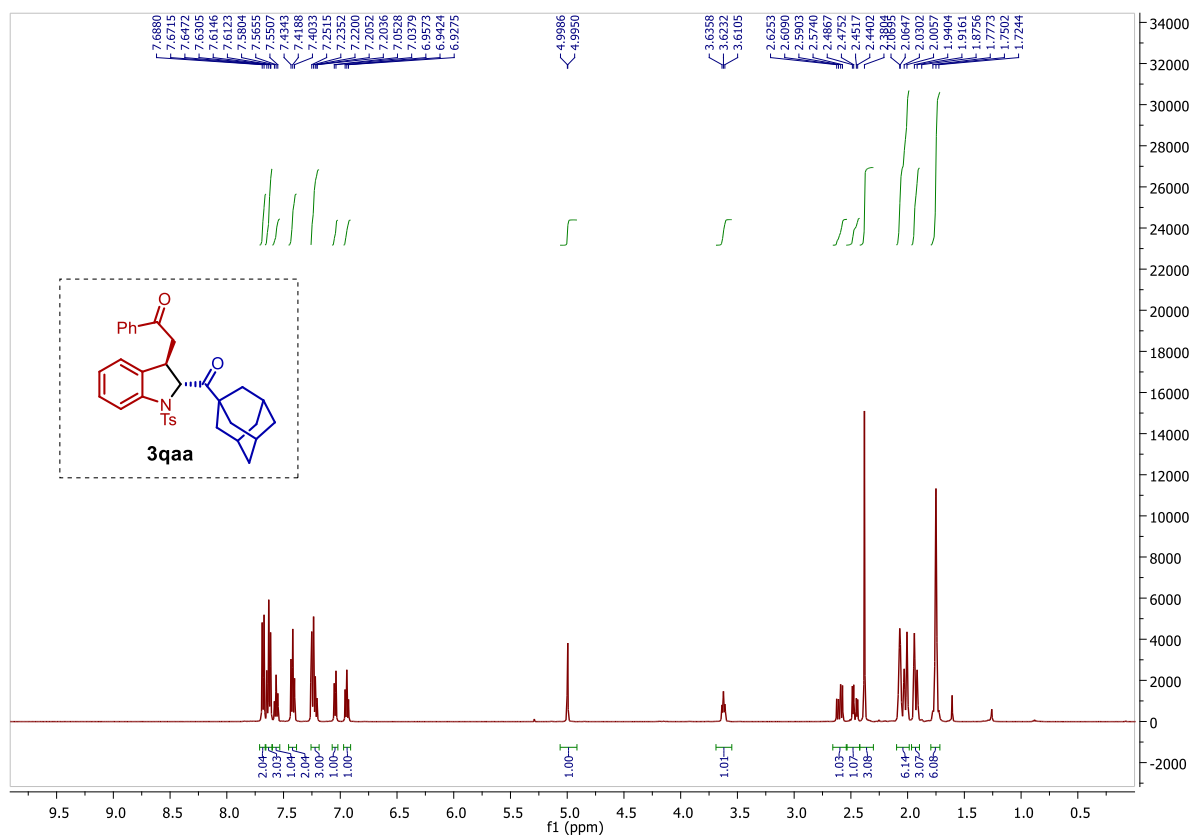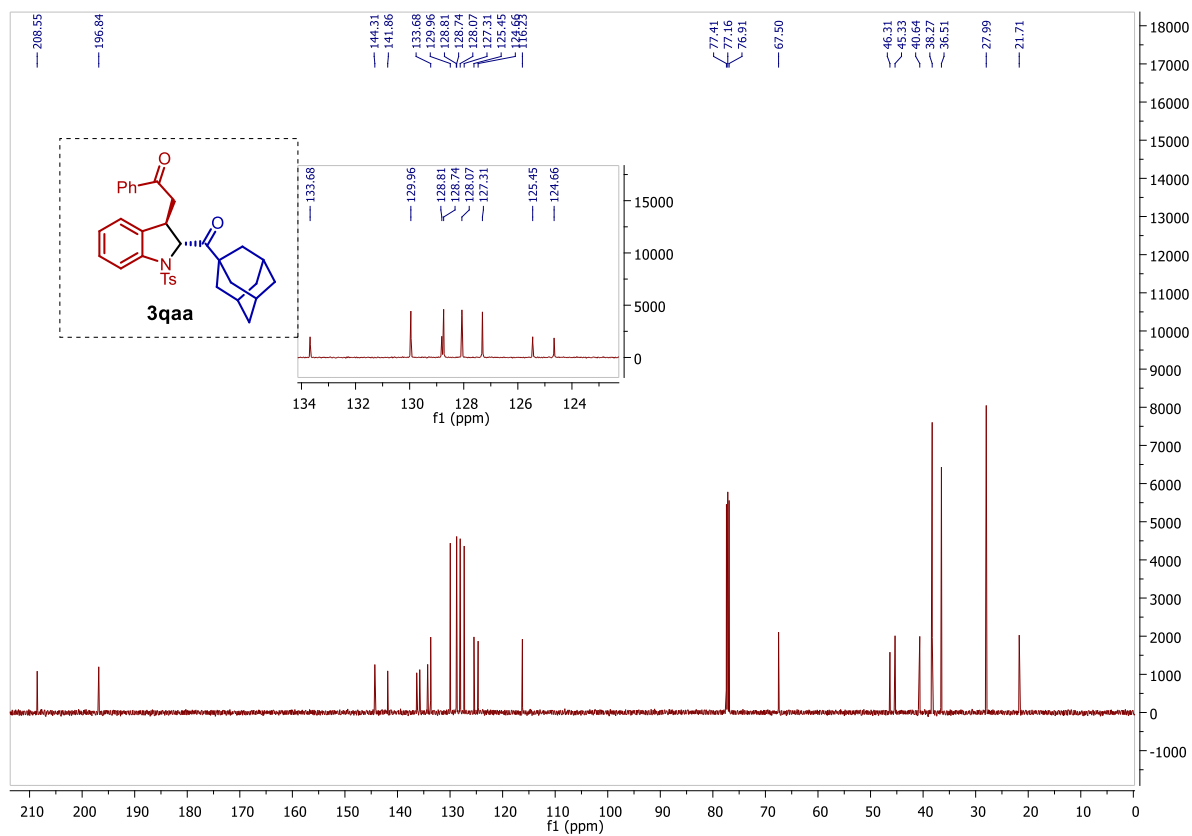

CDCl<sub>3</sub>, 500 MHz <sup>1</sup>H NMR and 125 MHz <sup>13</sup>C{<sup>1</sup>H} NMR Spectra of 3qaa

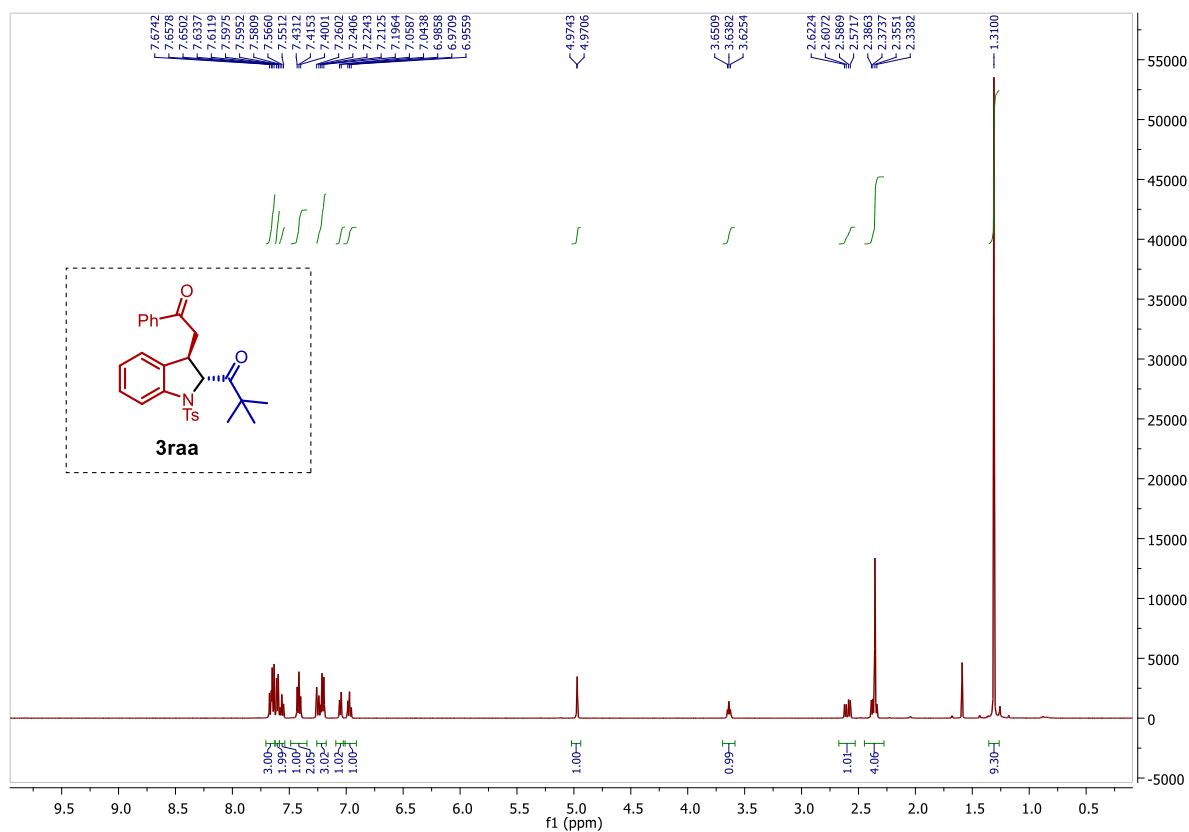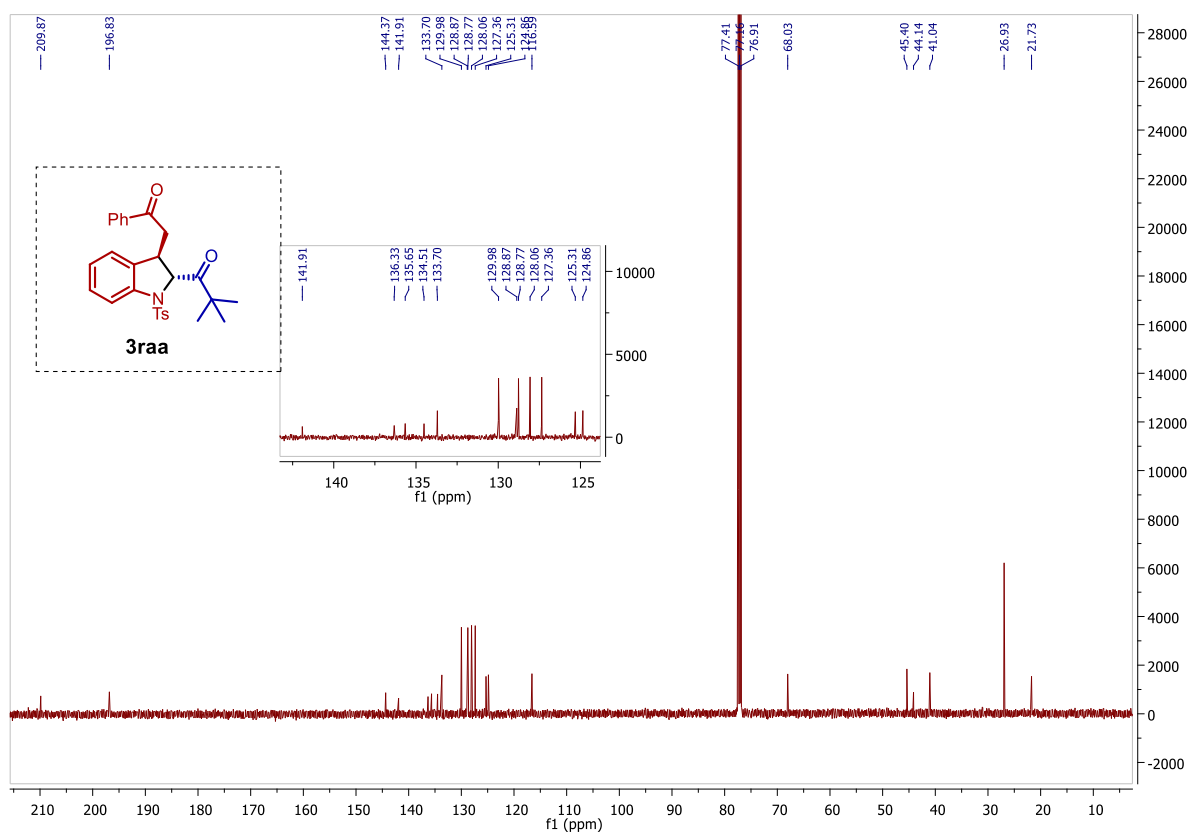

CDCl<sub>3</sub>, 500 MHz <sup>1</sup>H NMR and 125 MHz <sup>13</sup>C{<sup>1</sup>H} NMR Spectra of **3raa**

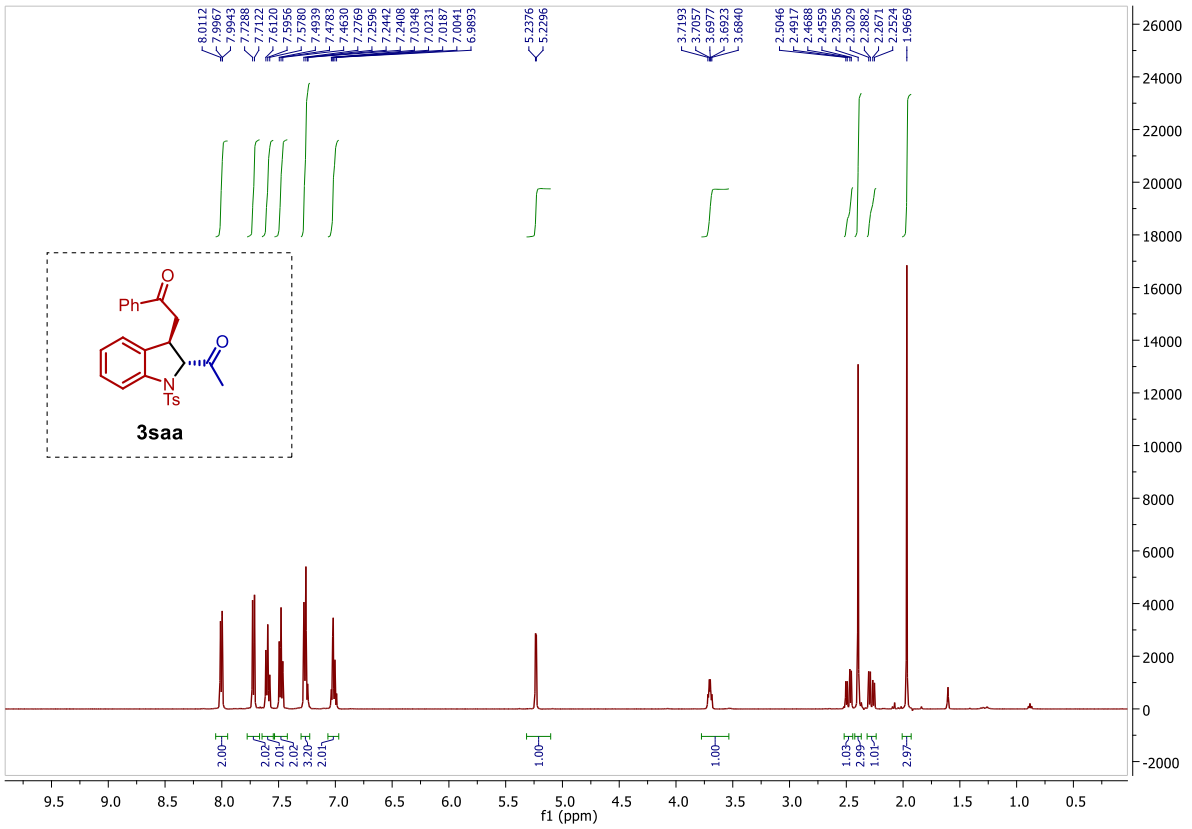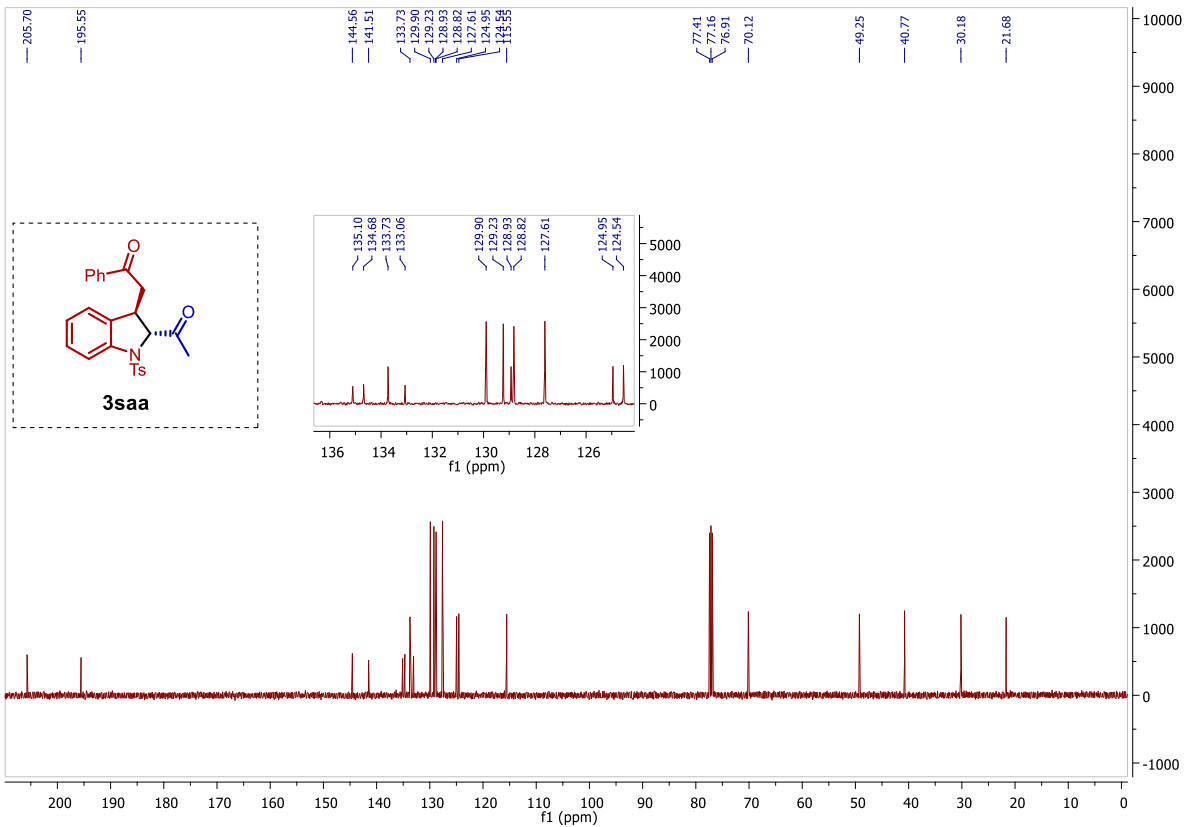

CDCl<sub>3</sub>, 500 MHz <sup>1</sup>H NMR and 125 MHz <sup>13</sup>C{<sup>1</sup>H} NMR Spectra of 3saa



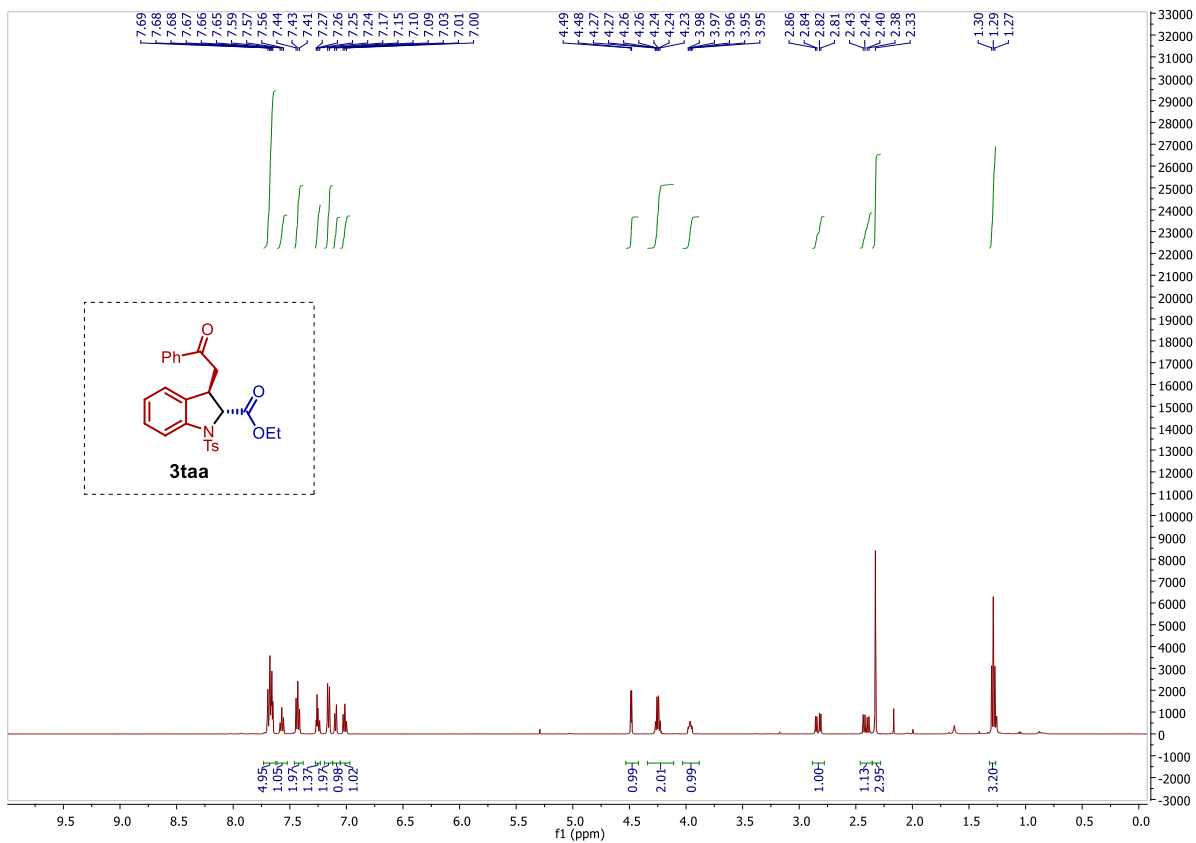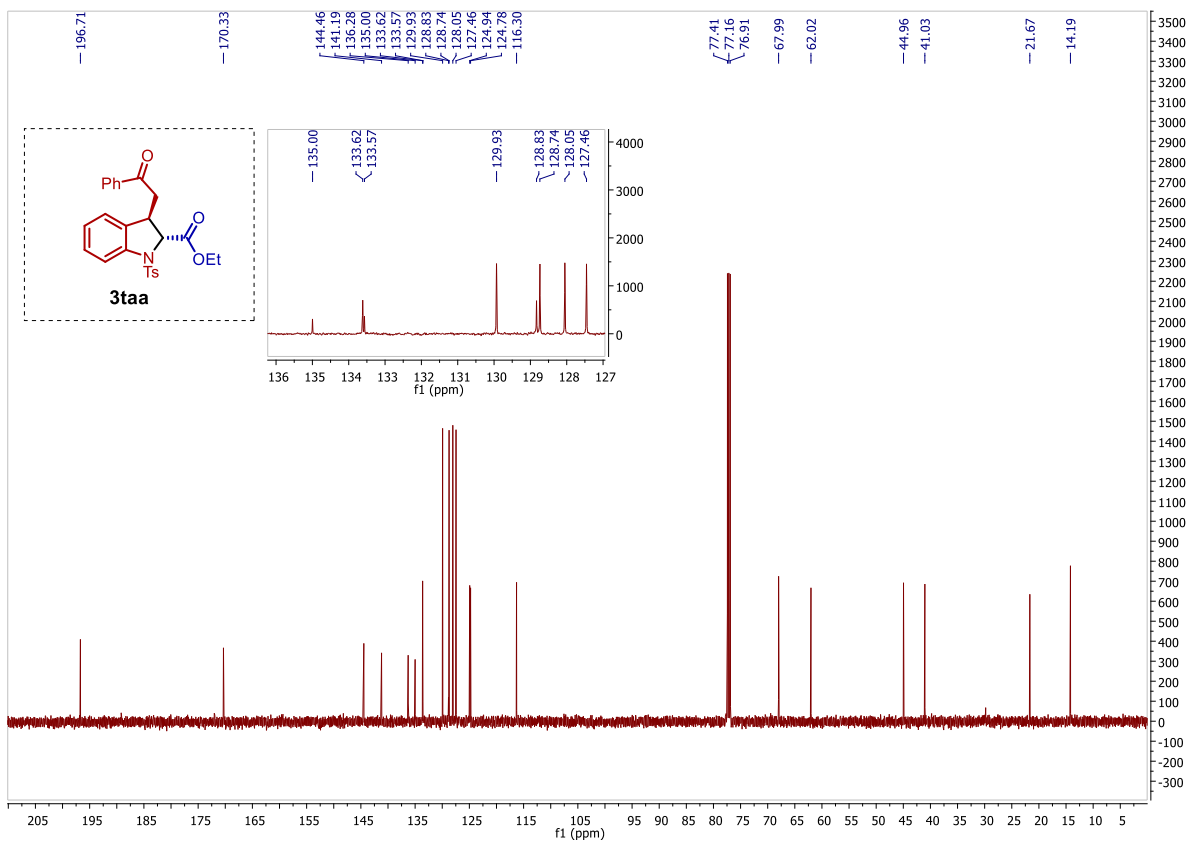

CDCl<sub>3</sub>, 500 MHz <sup>1</sup>H NMR and 125 MHz <sup>13</sup>C{<sup>1</sup>H} NMR Spectra of 3taa

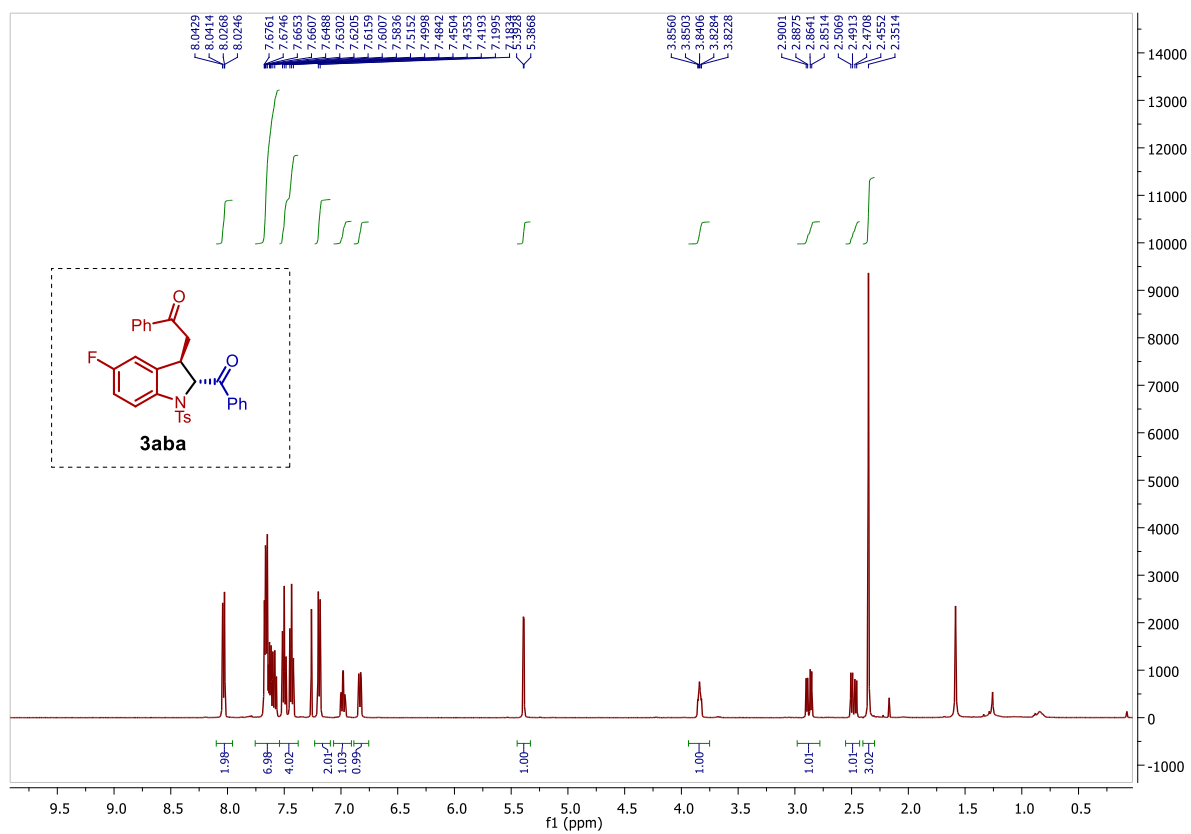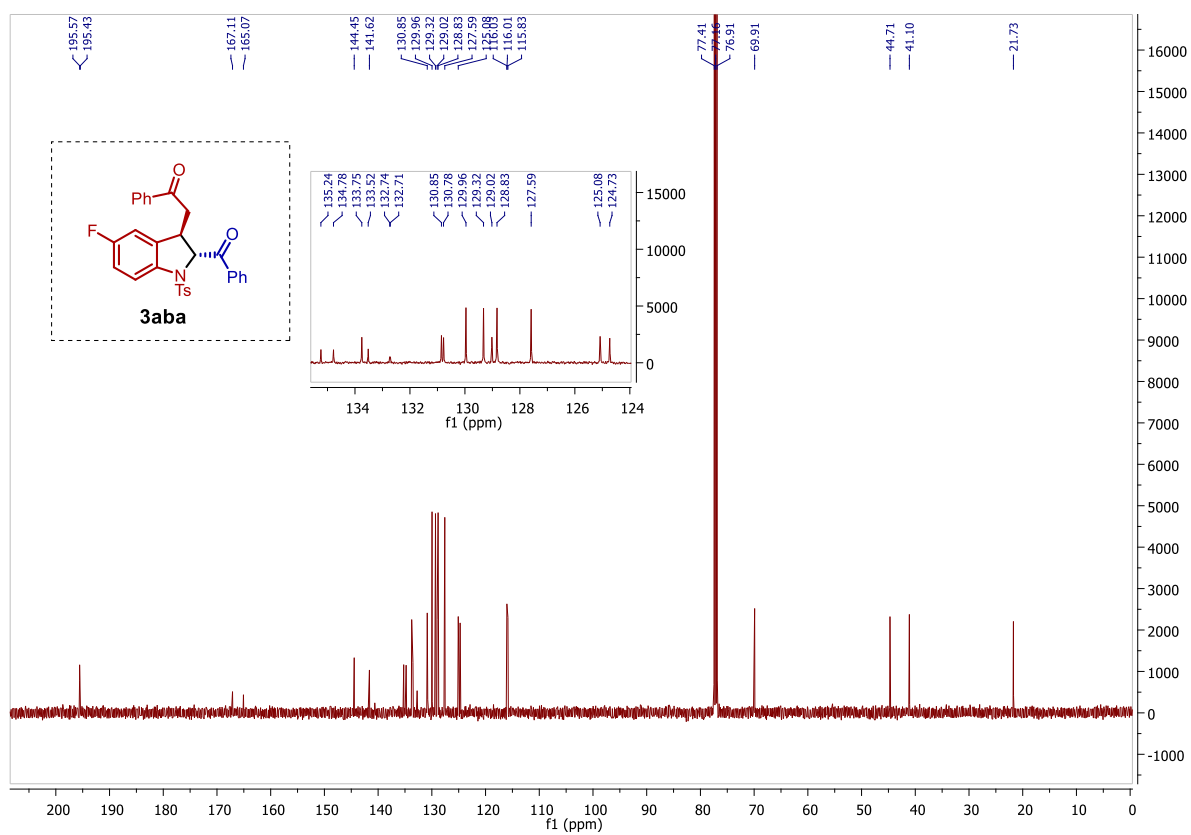

CDCl<sub>3</sub>, 500 MHz <sup>1</sup>H NMR and 125 MHz <sup>13</sup>C{<sup>1</sup>H} NMR Spectra of **3aba**

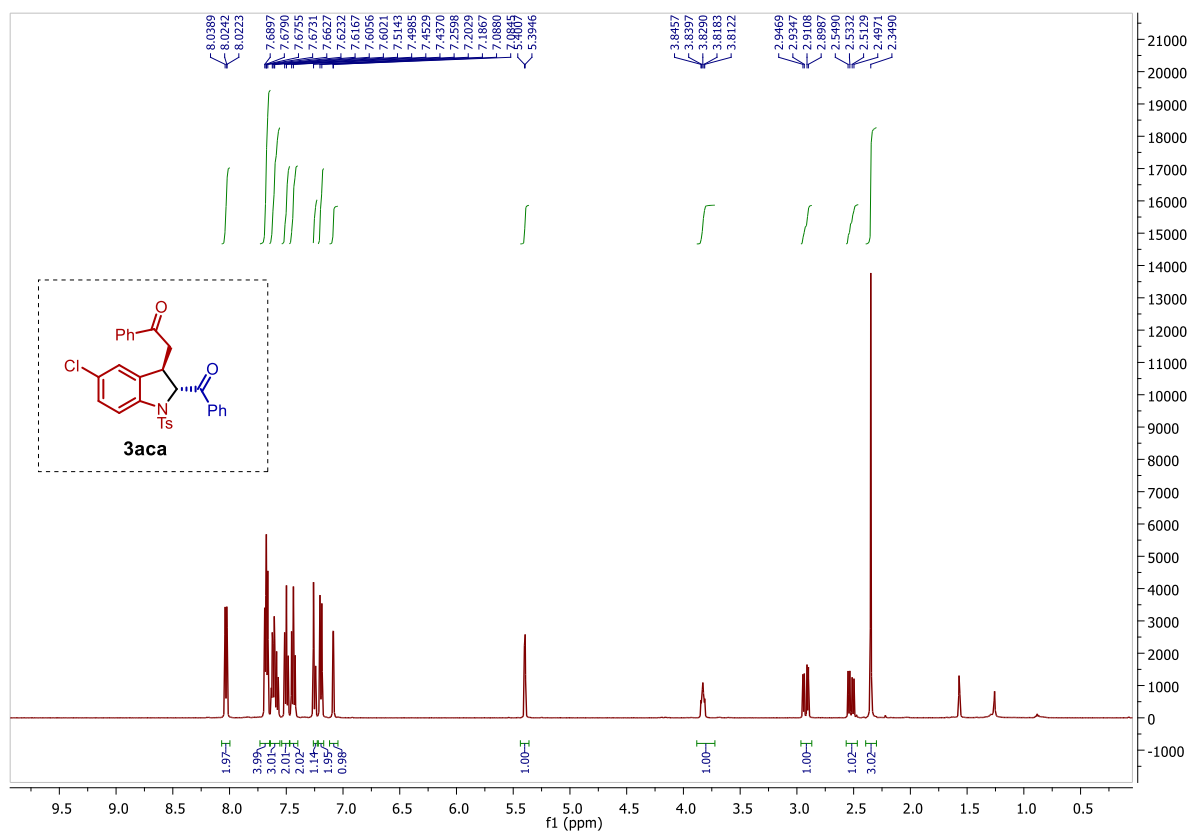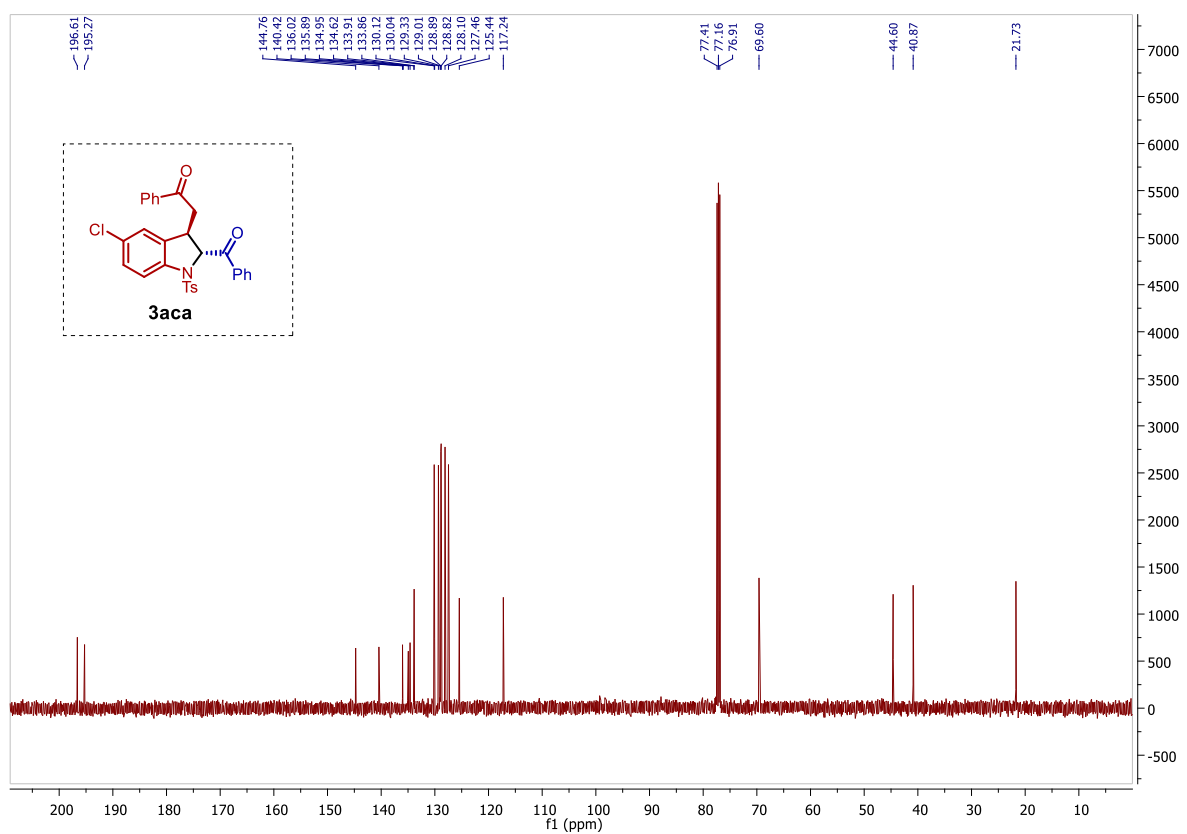

CDCl<sub>3</sub>, 500 MHz <sup>1</sup>H NMR and 125 MHz <sup>13</sup>C{<sup>1</sup>H} NMR Spectra of **3aca**

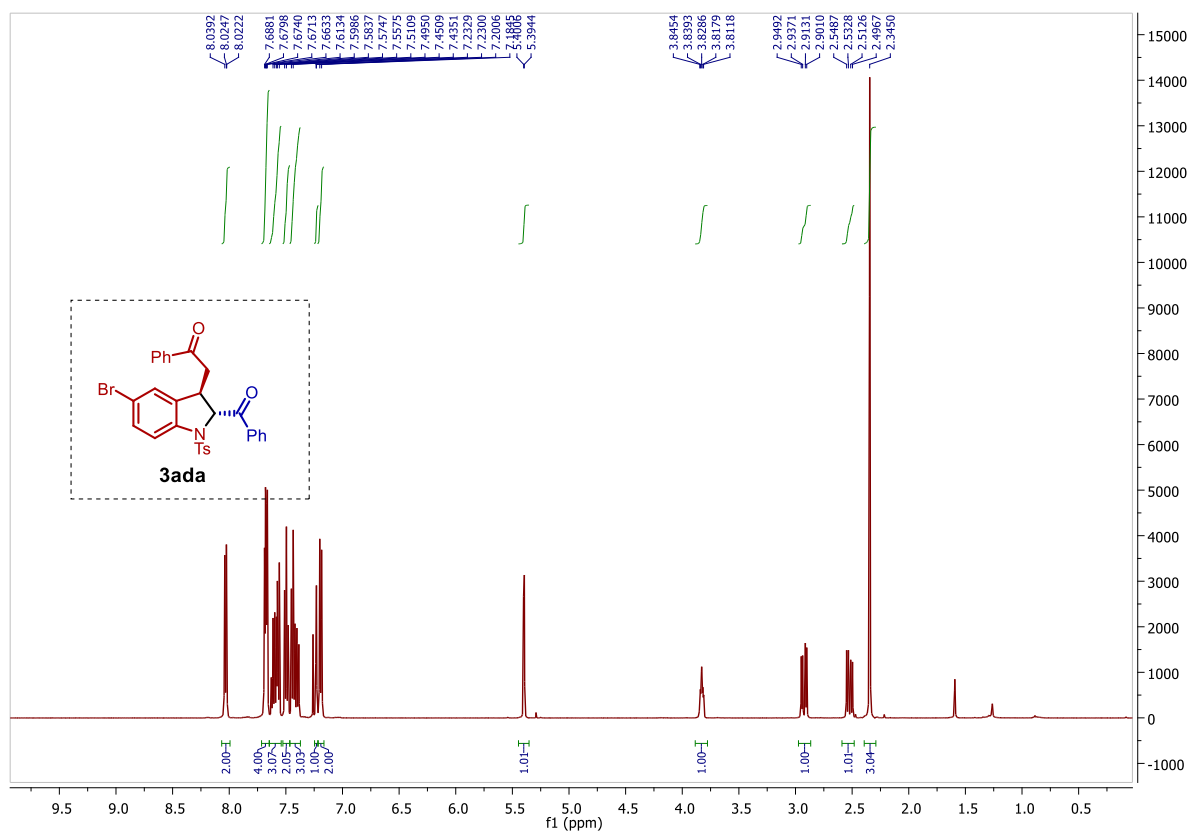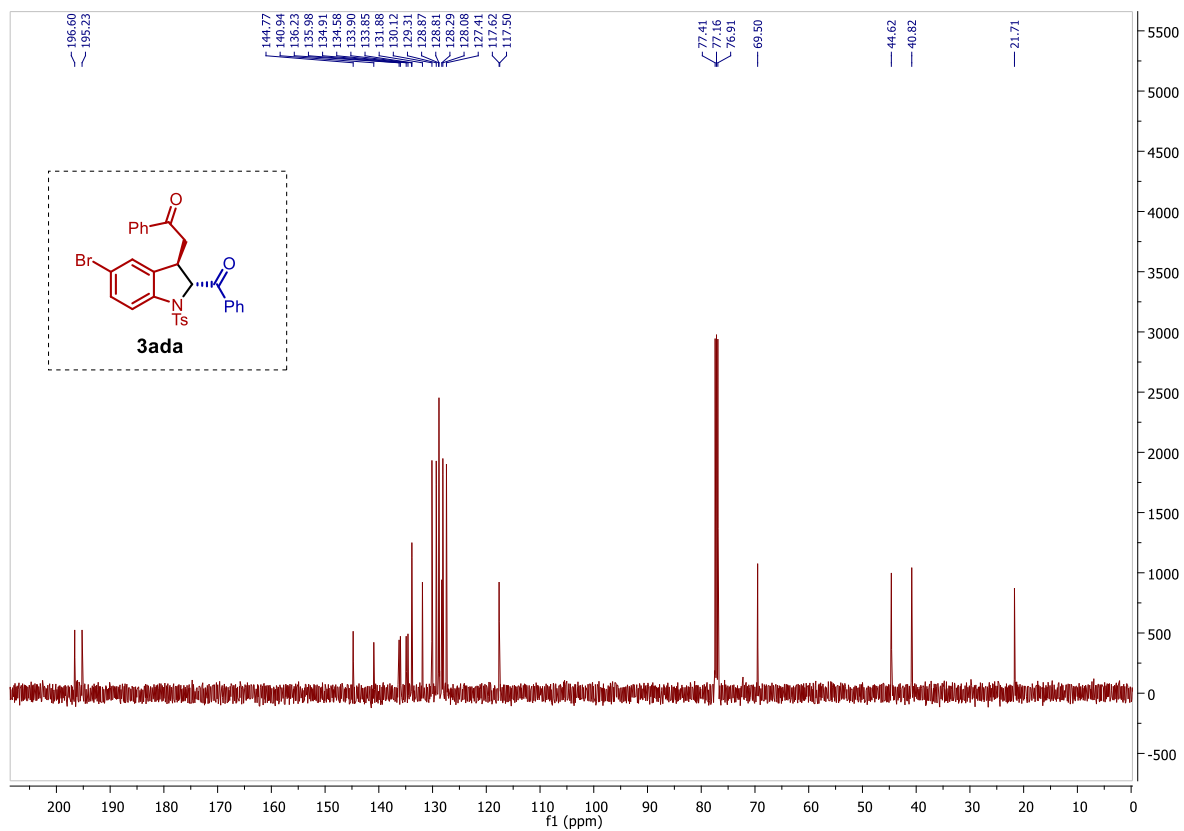

CDCl<sub>3</sub>, 500 MHz <sup>1</sup>H NMR and 125 MHz <sup>13</sup>C{<sup>1</sup>H} NMR Spectra of **3ada**

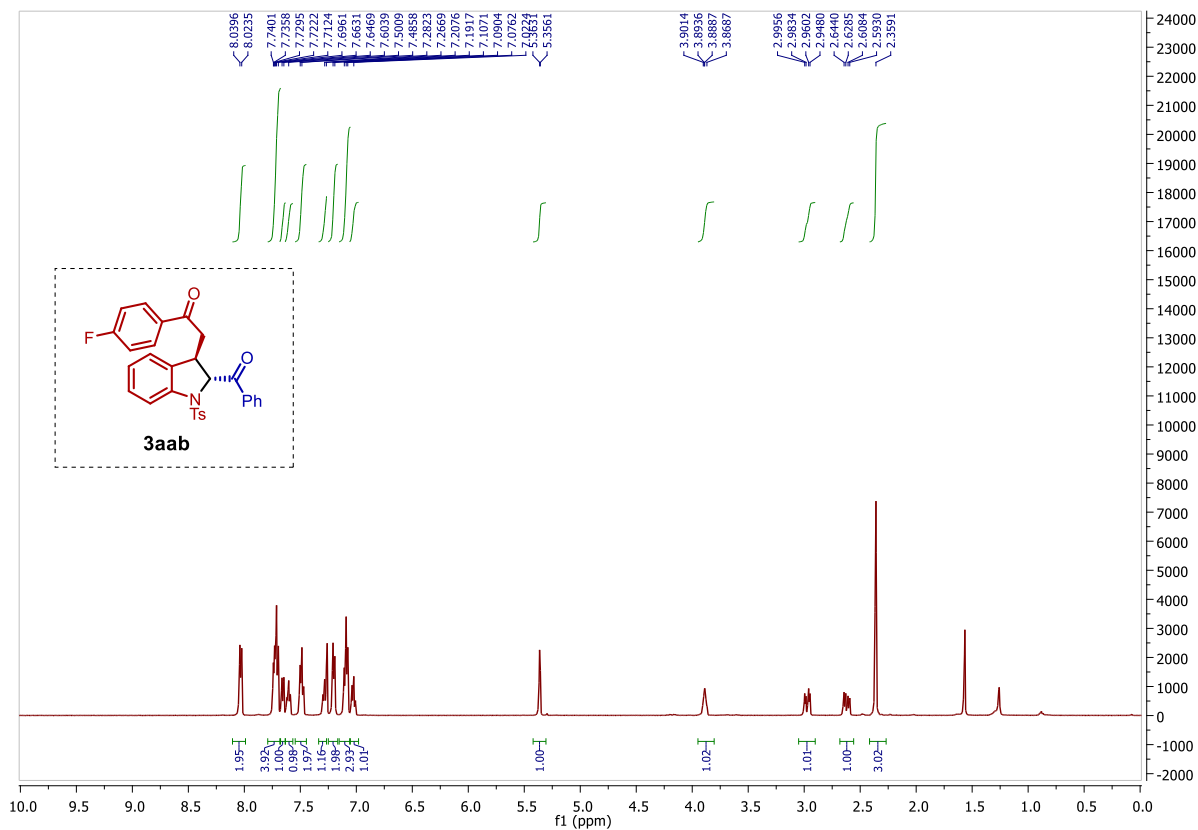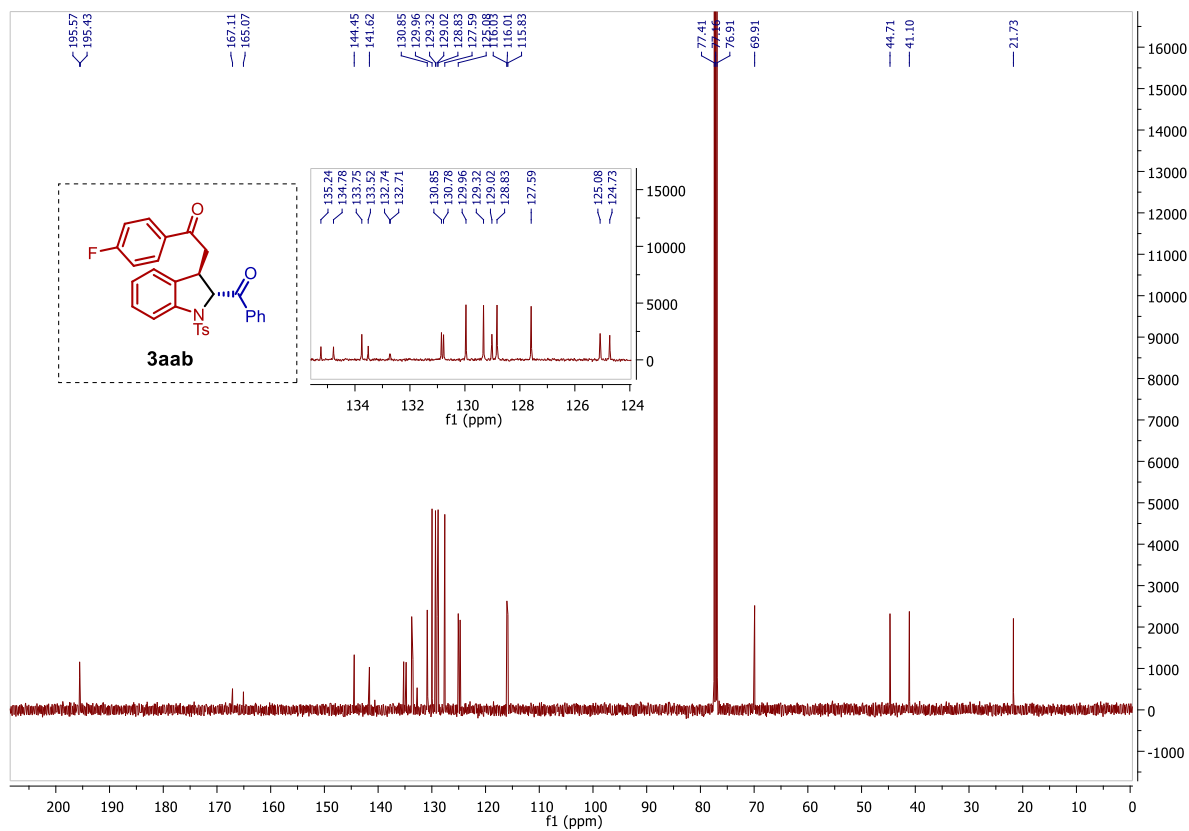

CDCl<sub>3</sub>, 500 MHz <sup>1</sup>H NMR and 125 MHz <sup>13</sup>C{<sup>1</sup>H} NMR Spectra of 3aab

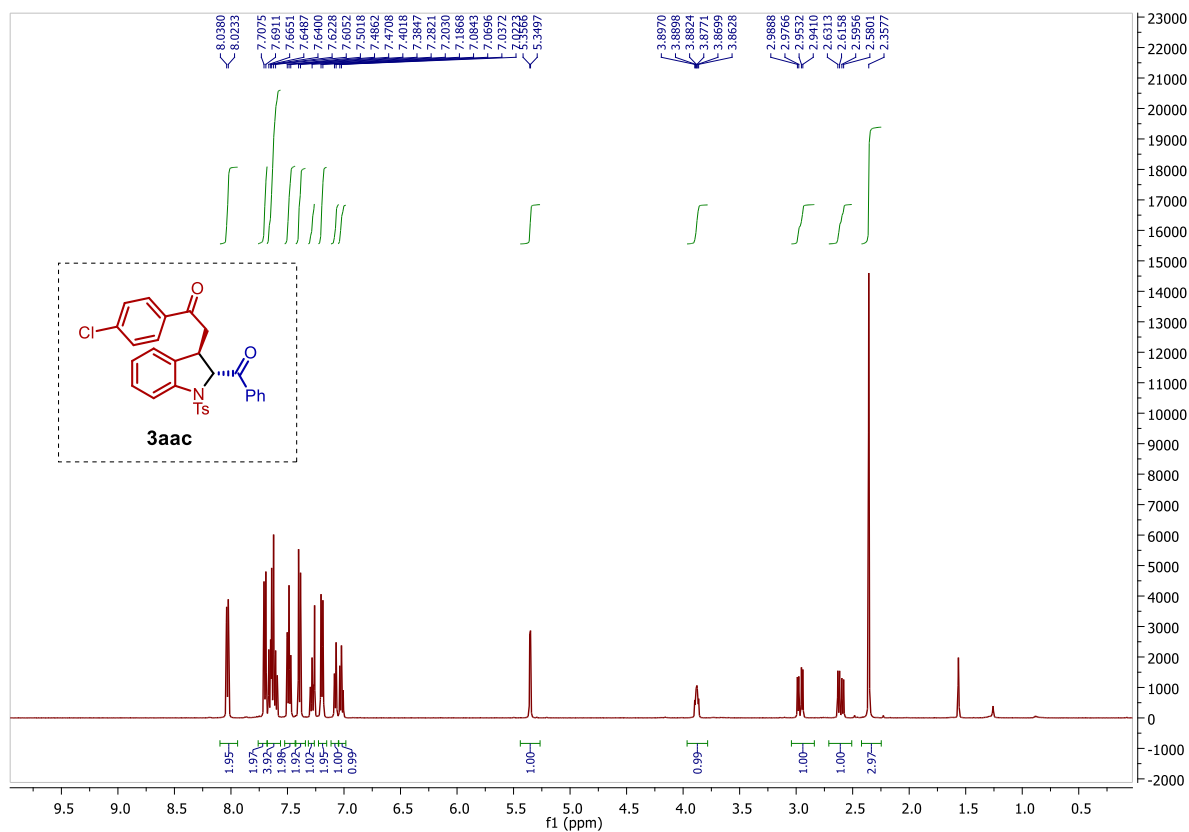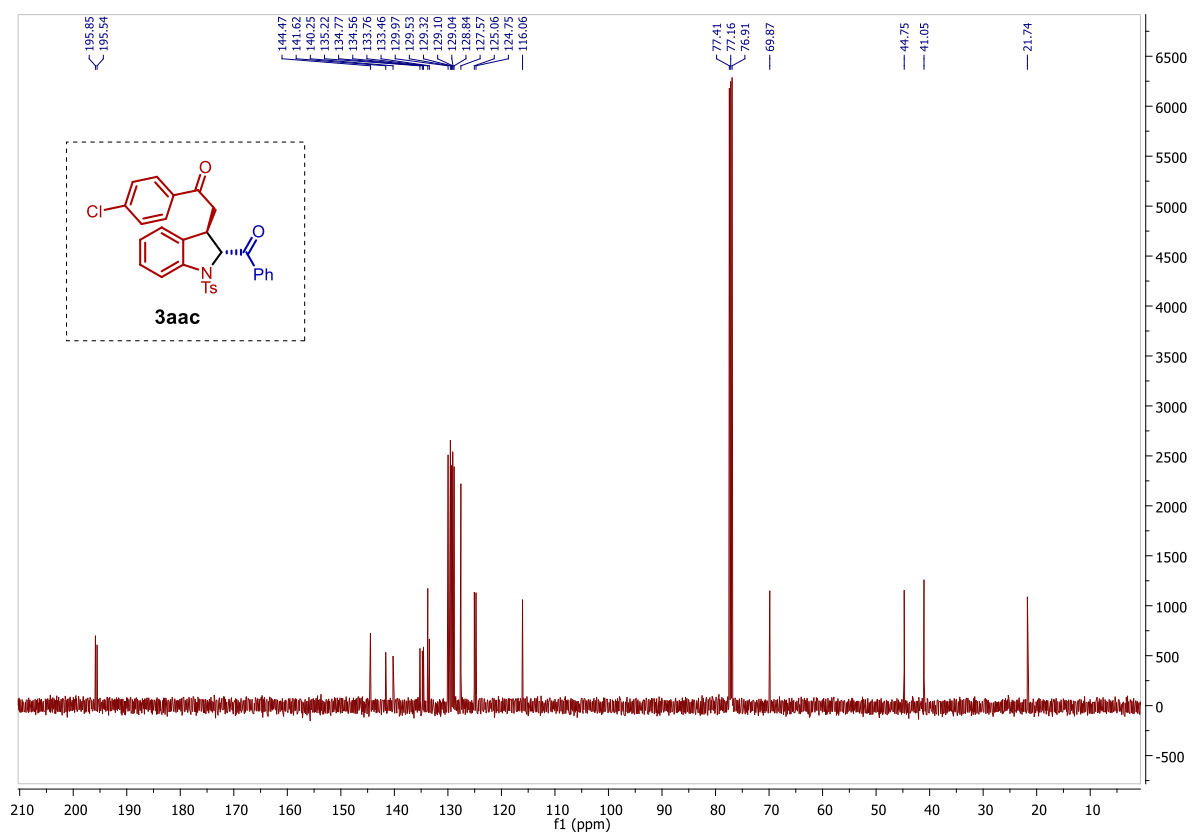

CDCl<sub>3</sub>, 500 MHz <sup>1</sup>H NMR and 125 MHz <sup>13</sup>C{<sup>1</sup>H} NMR Spectra of **3aac**

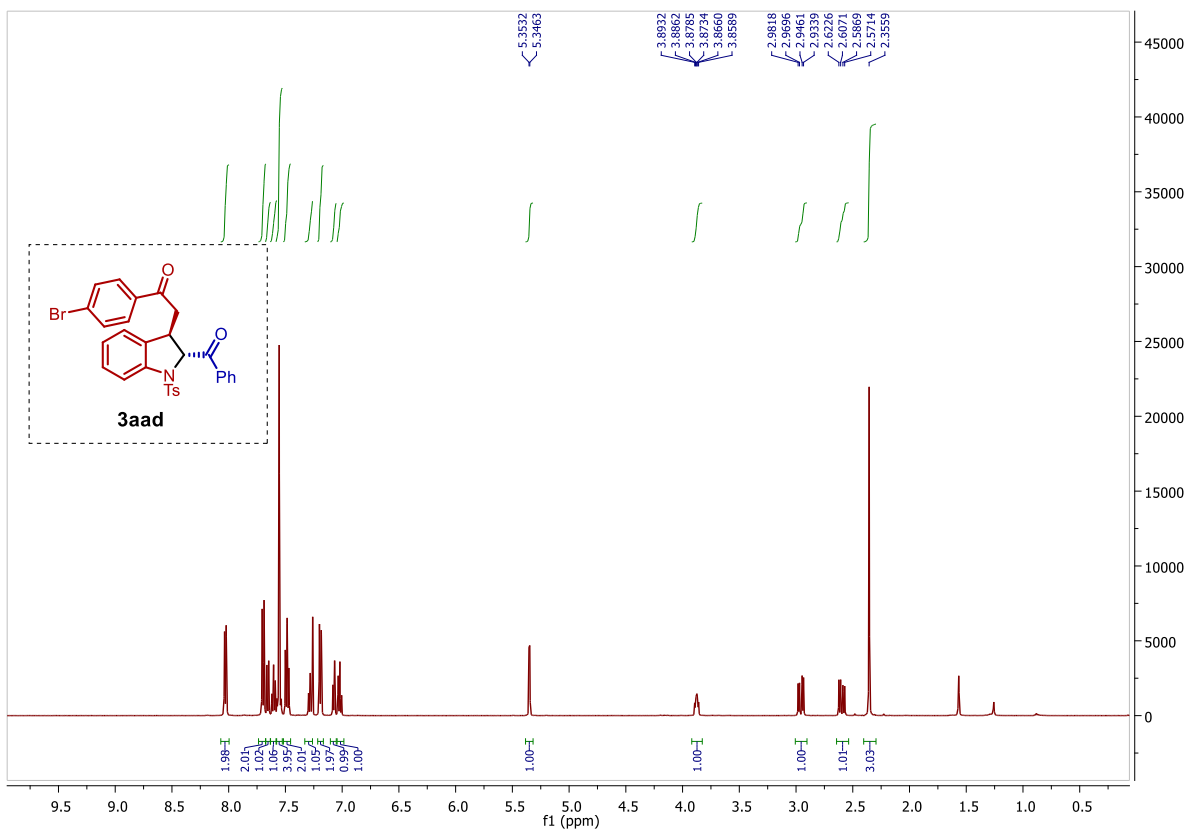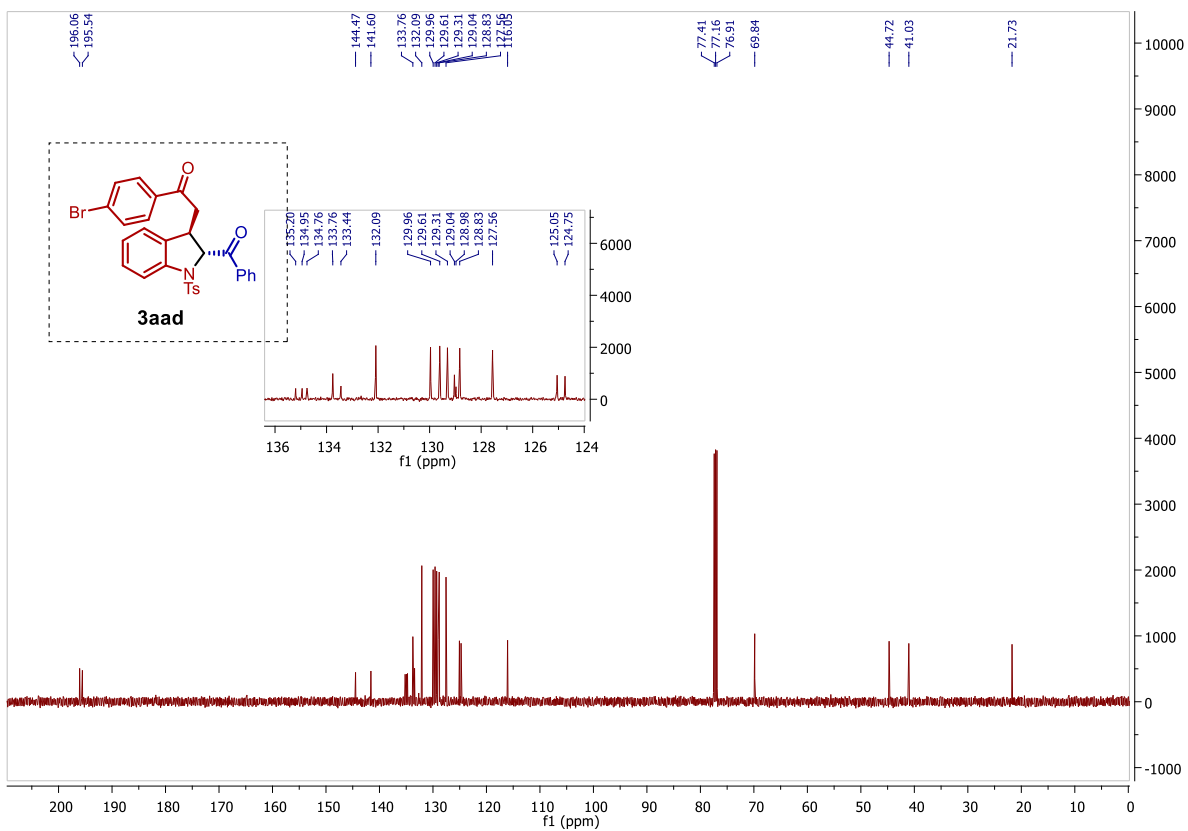

CDCl<sub>3</sub>, 500 MHz <sup>1</sup>H NMR and 125 MHz <sup>13</sup>C{<sup>1</sup>H} NMR Spectra of **3aad**

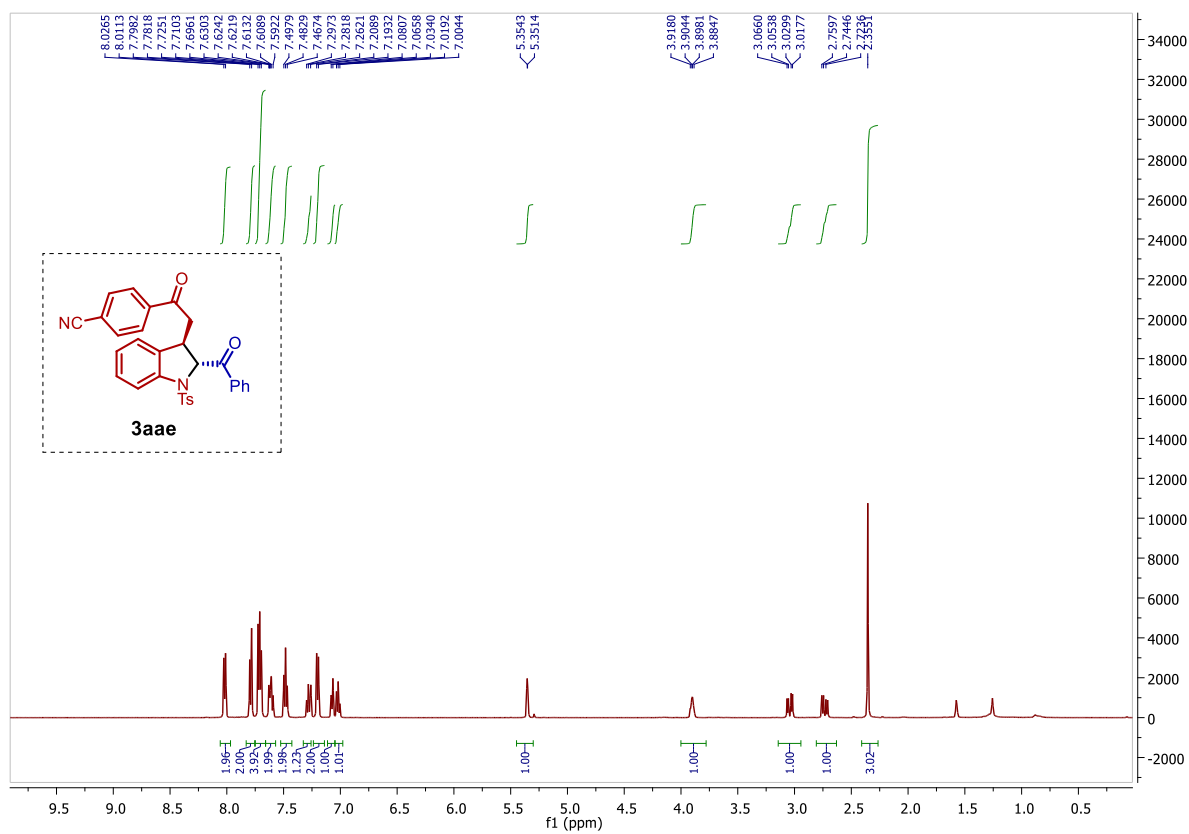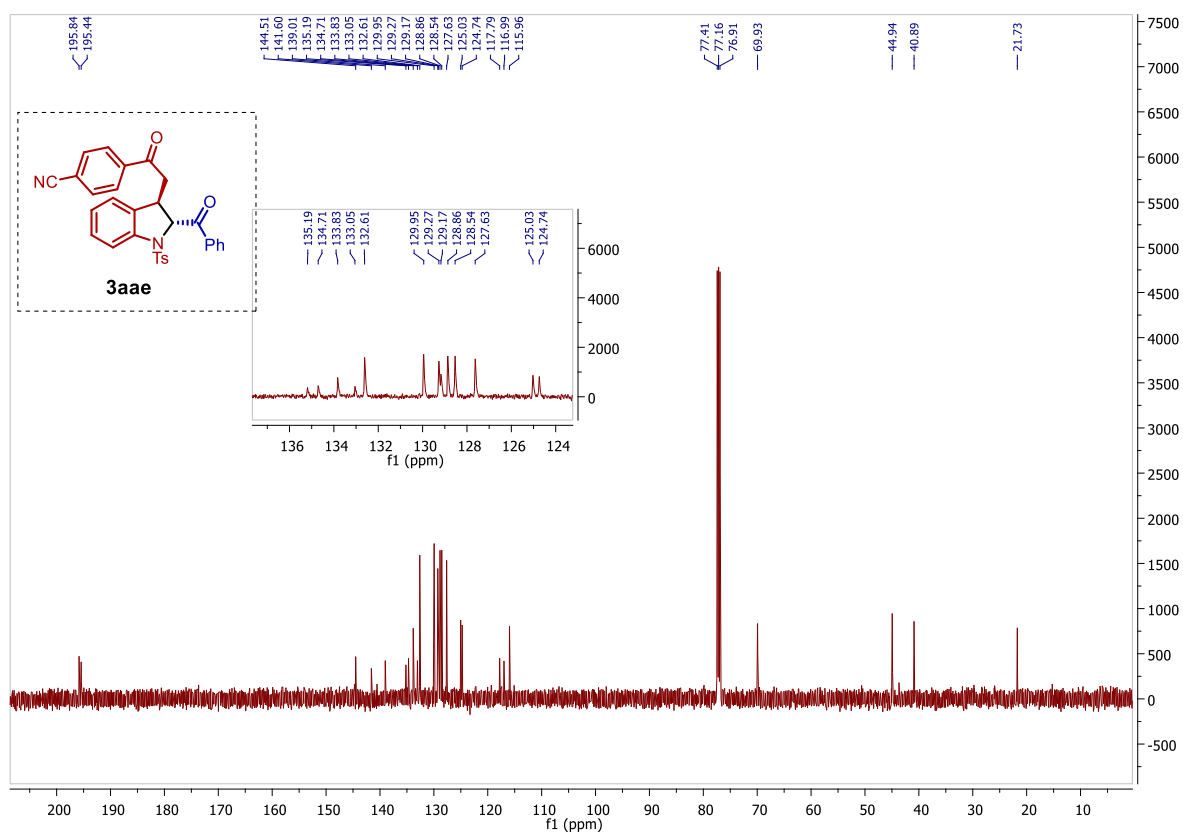

CDCl<sub>3</sub>, 500 MHz <sup>1</sup>H NMR and 125 MHz <sup>13</sup>C{<sup>1</sup>H} NMR Spectra of 3aae



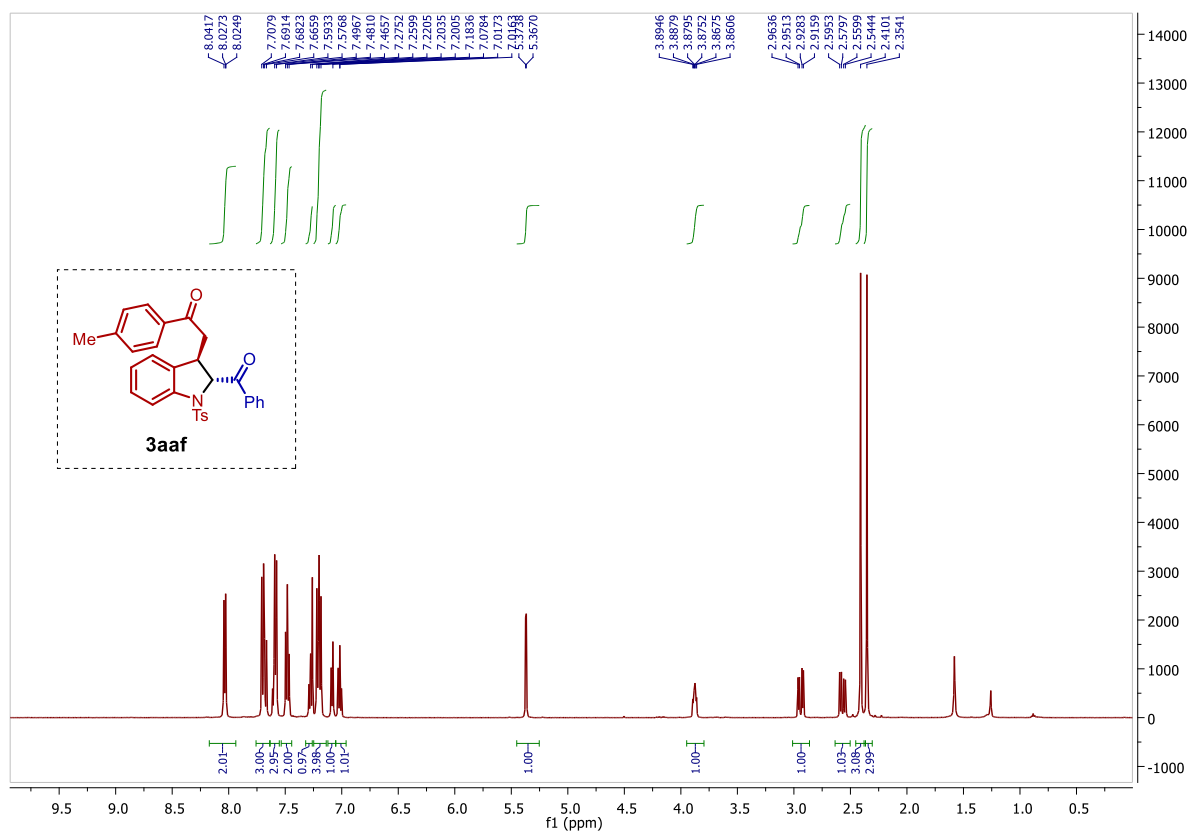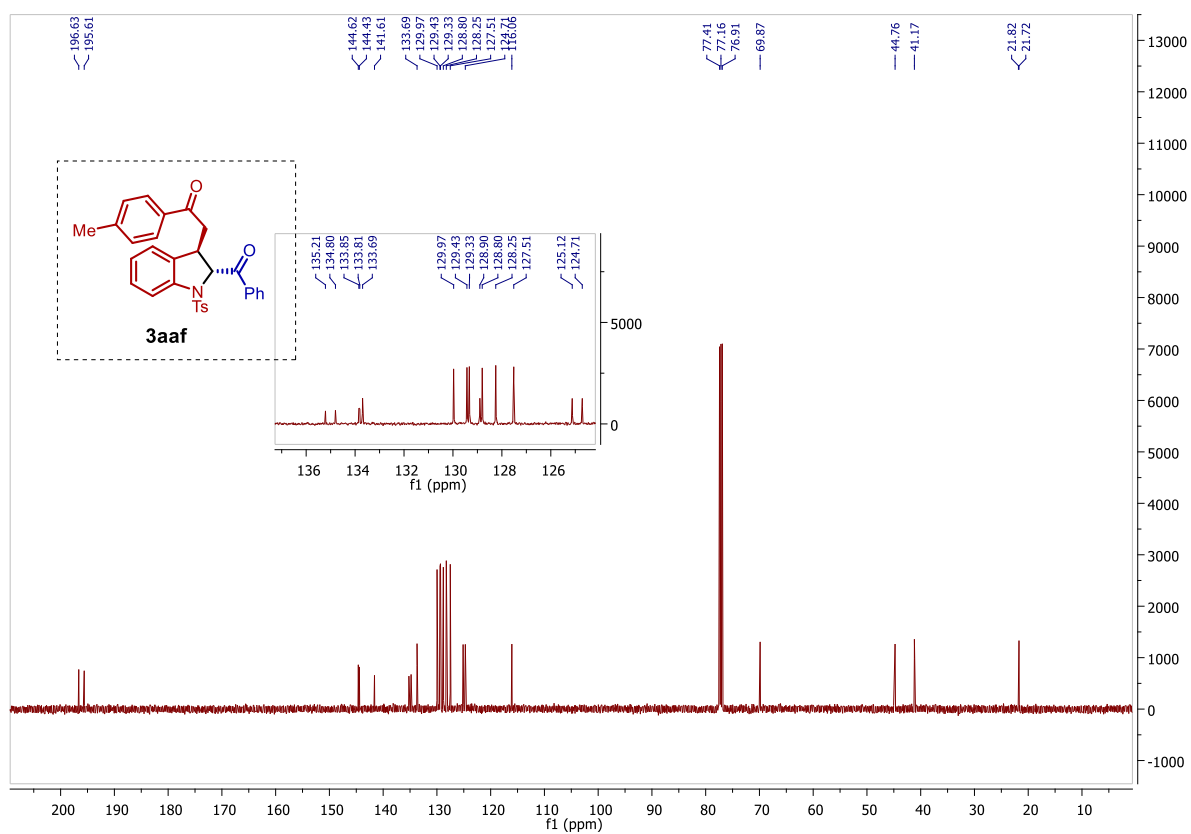

CDCl<sub>3</sub>, 500 MHz <sup>1</sup>H NMR and 125 MHz <sup>13</sup>C{<sup>1</sup>H} NMR Spectra of 3aaf

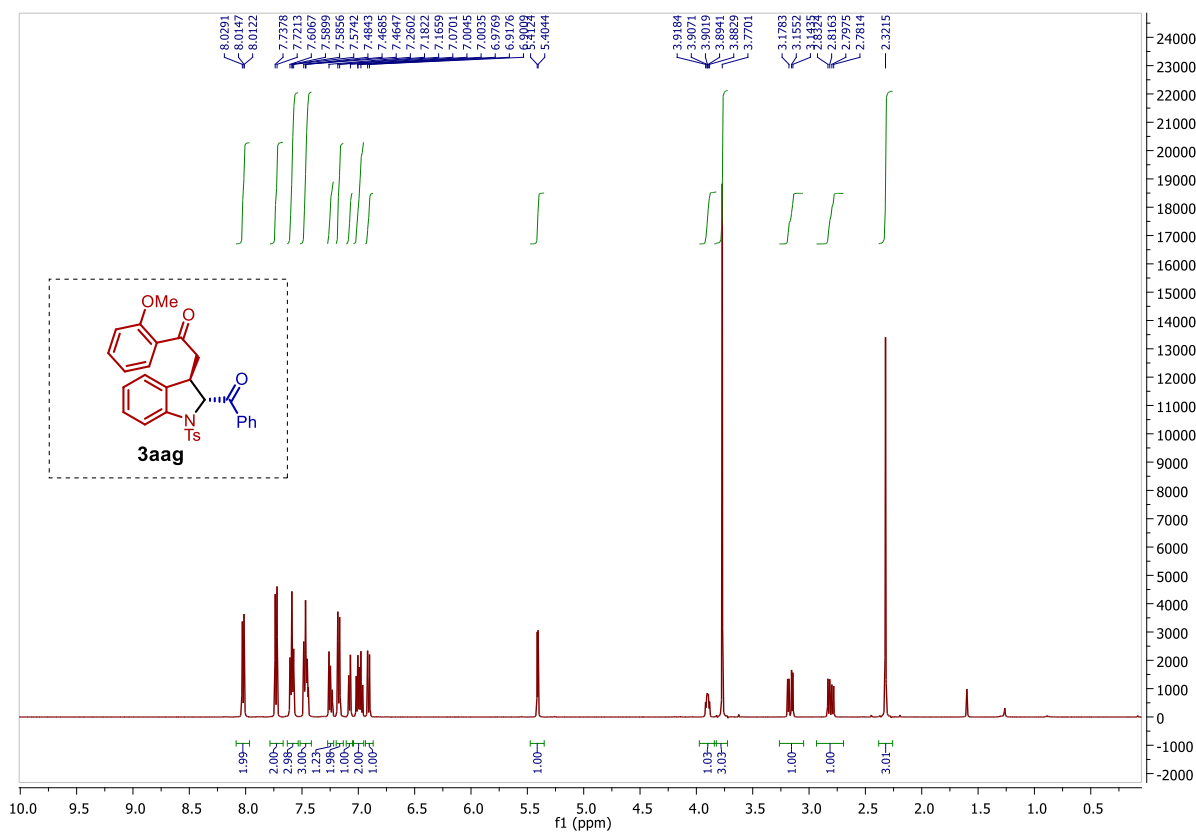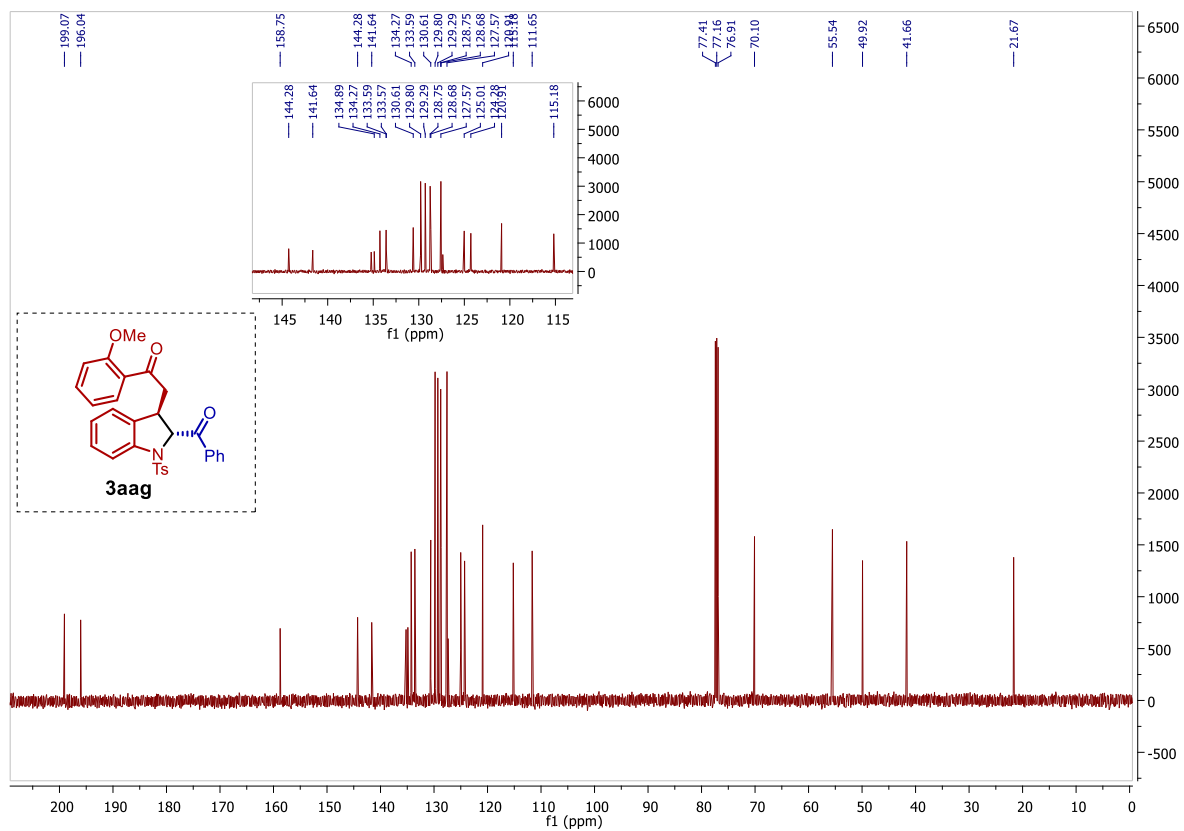

CDCl<sub>3</sub>, 500 MHz <sup>1</sup>H NMR and 125 MHz <sup>13</sup>C{<sup>1</sup>H} NMR Spectra of **3aag**

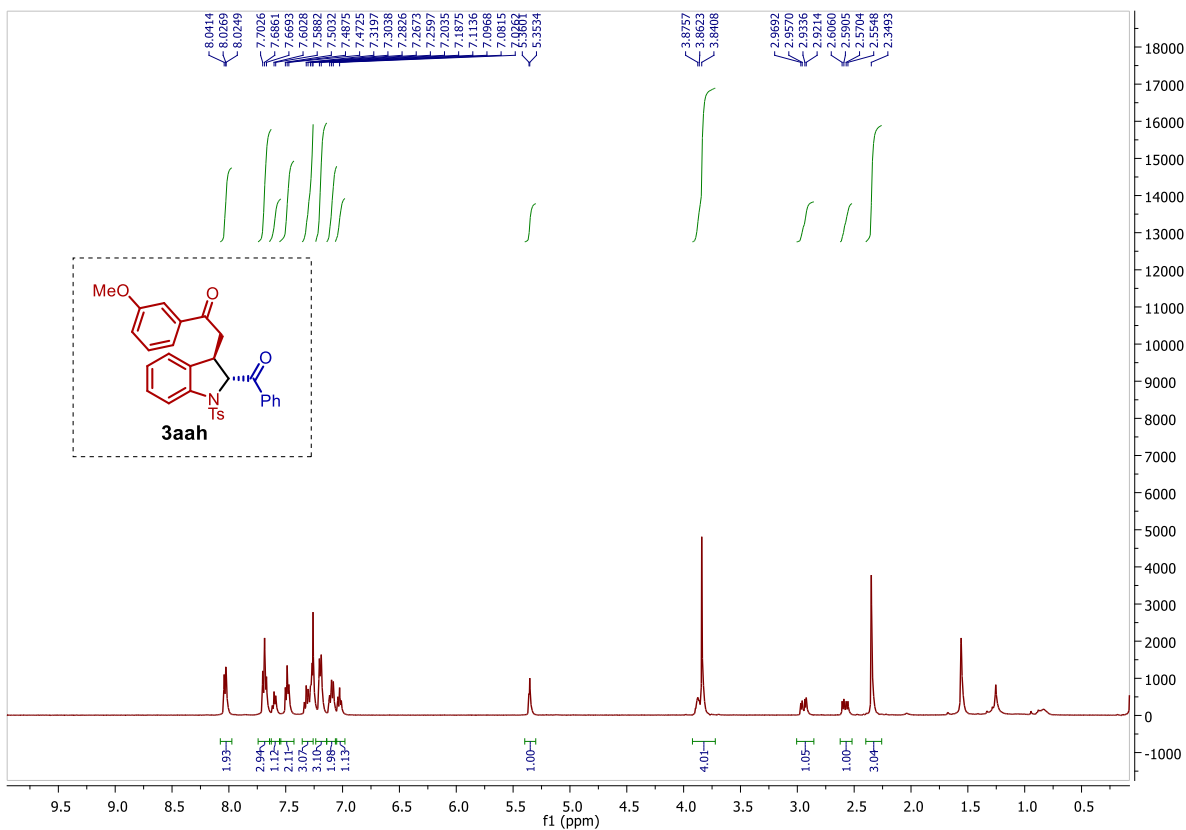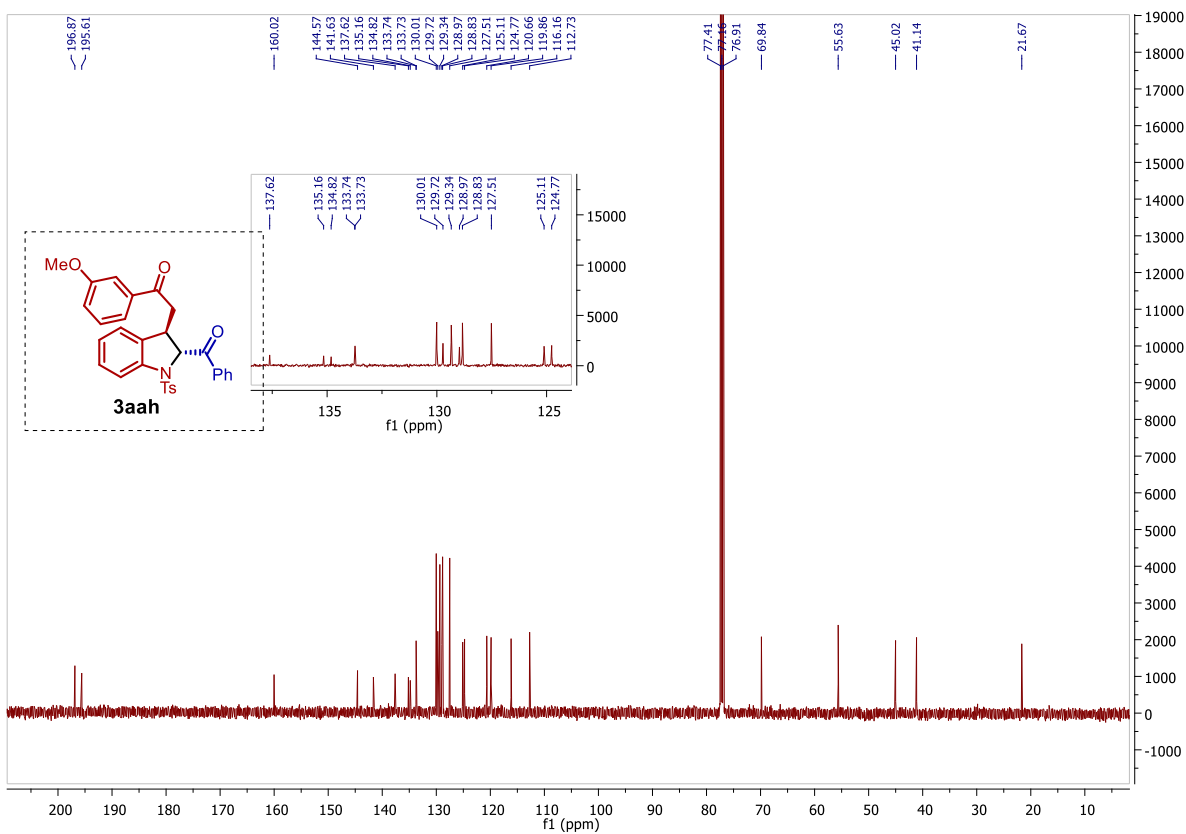

CDCl<sub>3</sub>, 500 MHz <sup>1</sup>H NMR and 125 MHz <sup>13</sup>C{<sup>1</sup>H} NMR Spectra of **3aah**

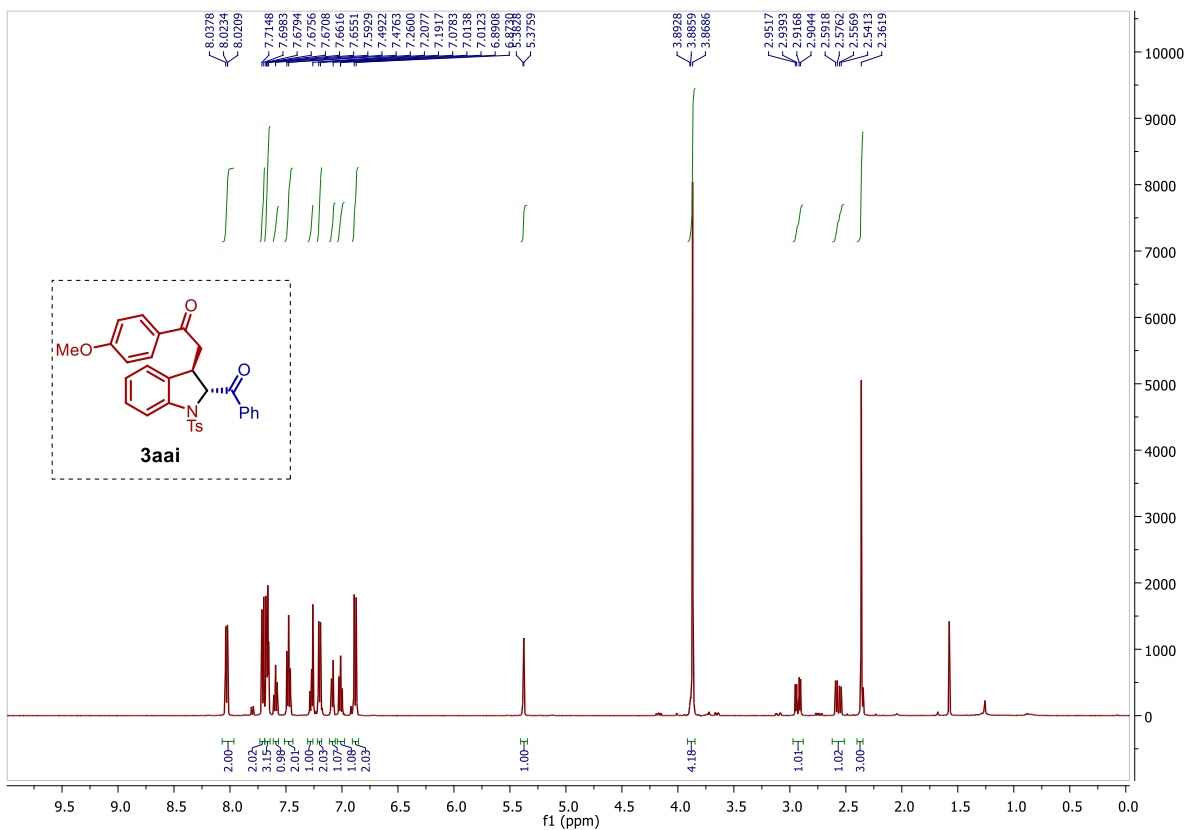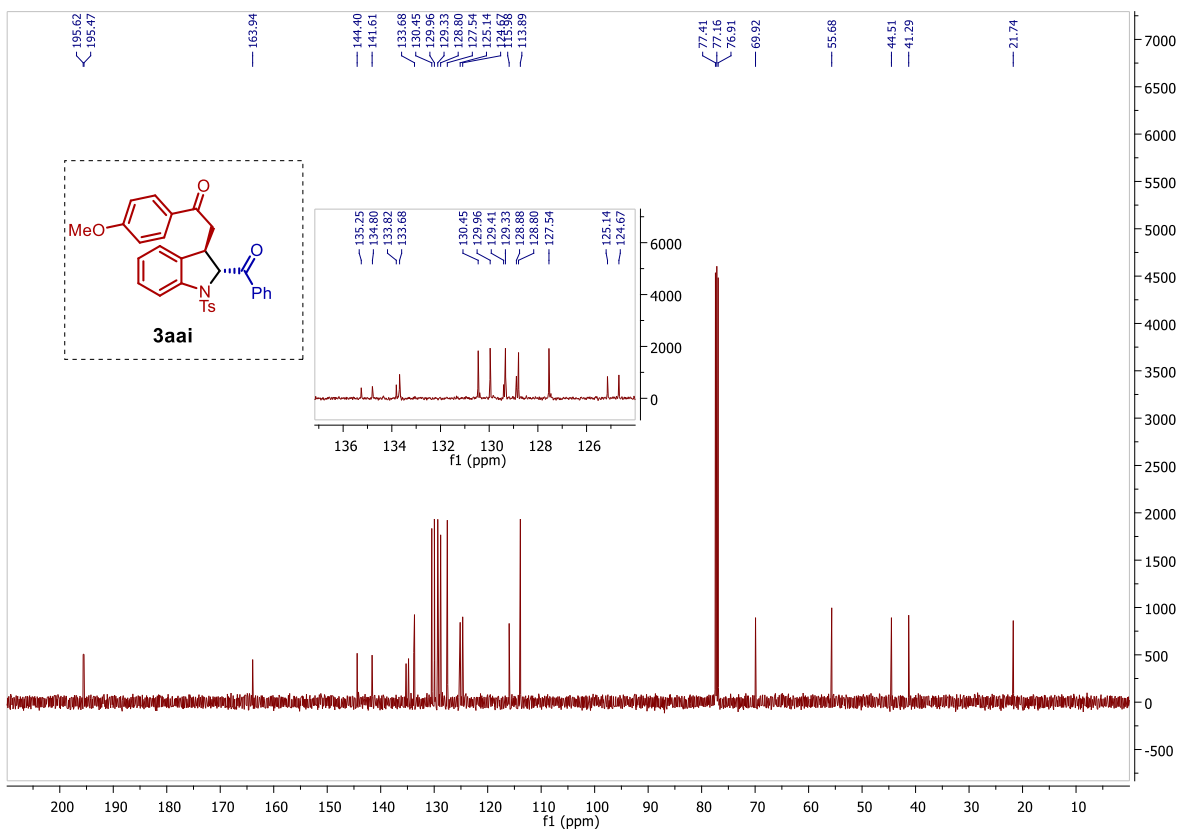

CDCl<sub>3</sub>, 500 MHz <sup>1</sup>H NMR and 125 MHz <sup>13</sup>C{<sup>1</sup>H} NMR Spectra of 3aai

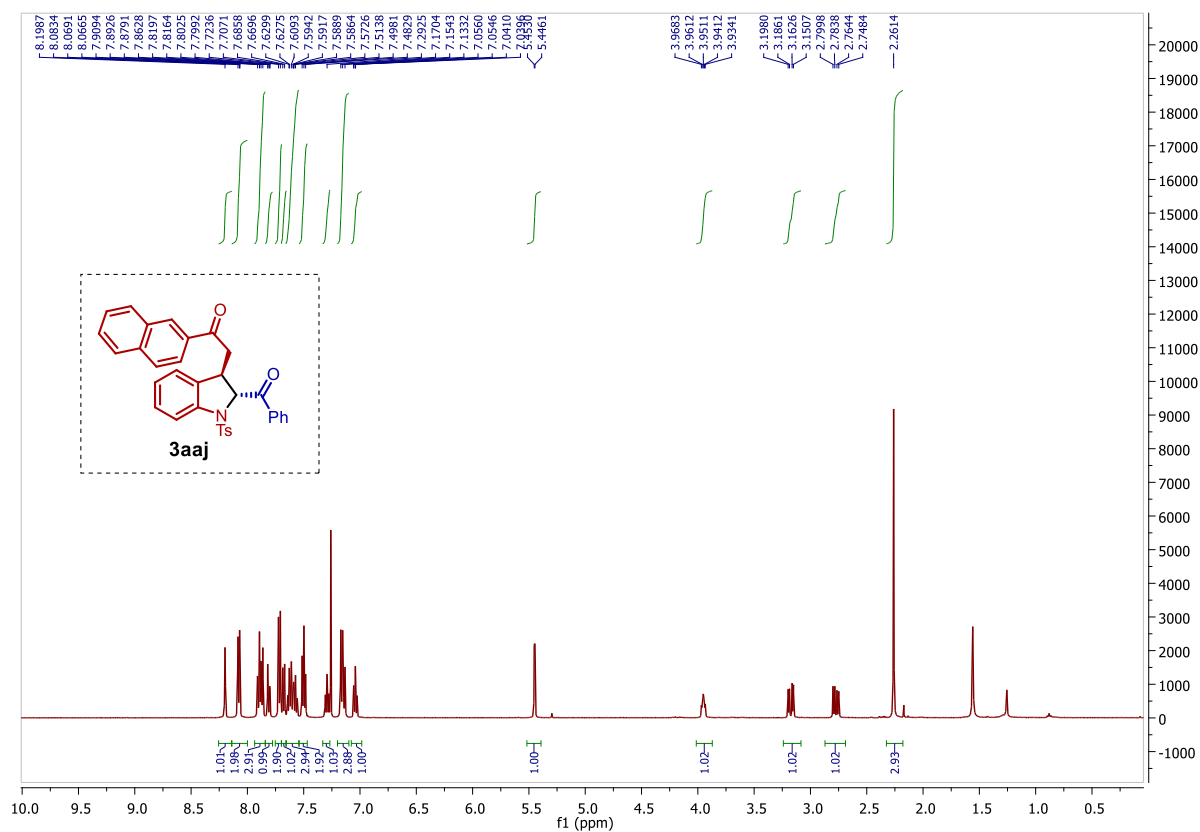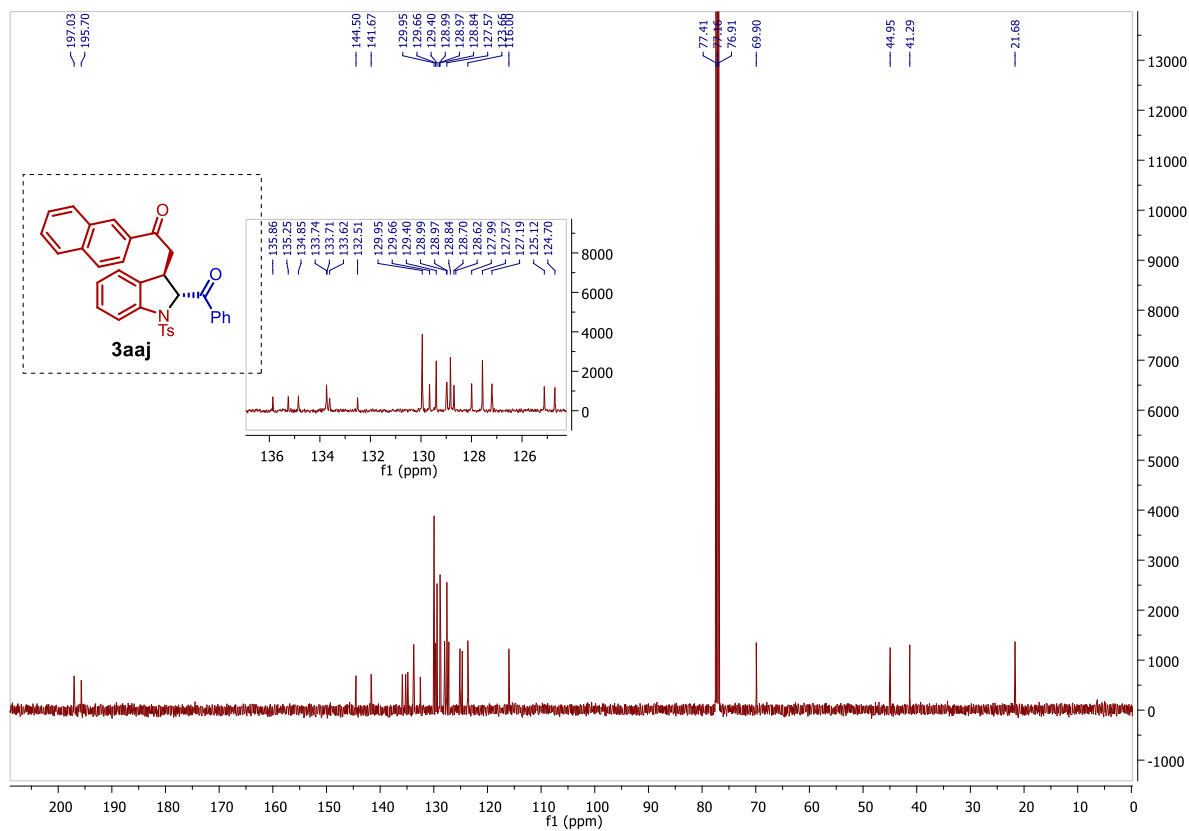

CDCl<sub>3</sub>, 500 MHz <sup>1</sup>H NMR and 125 MHz <sup>13</sup>C{<sup>1</sup>H} NMR Spectra of 3aaj

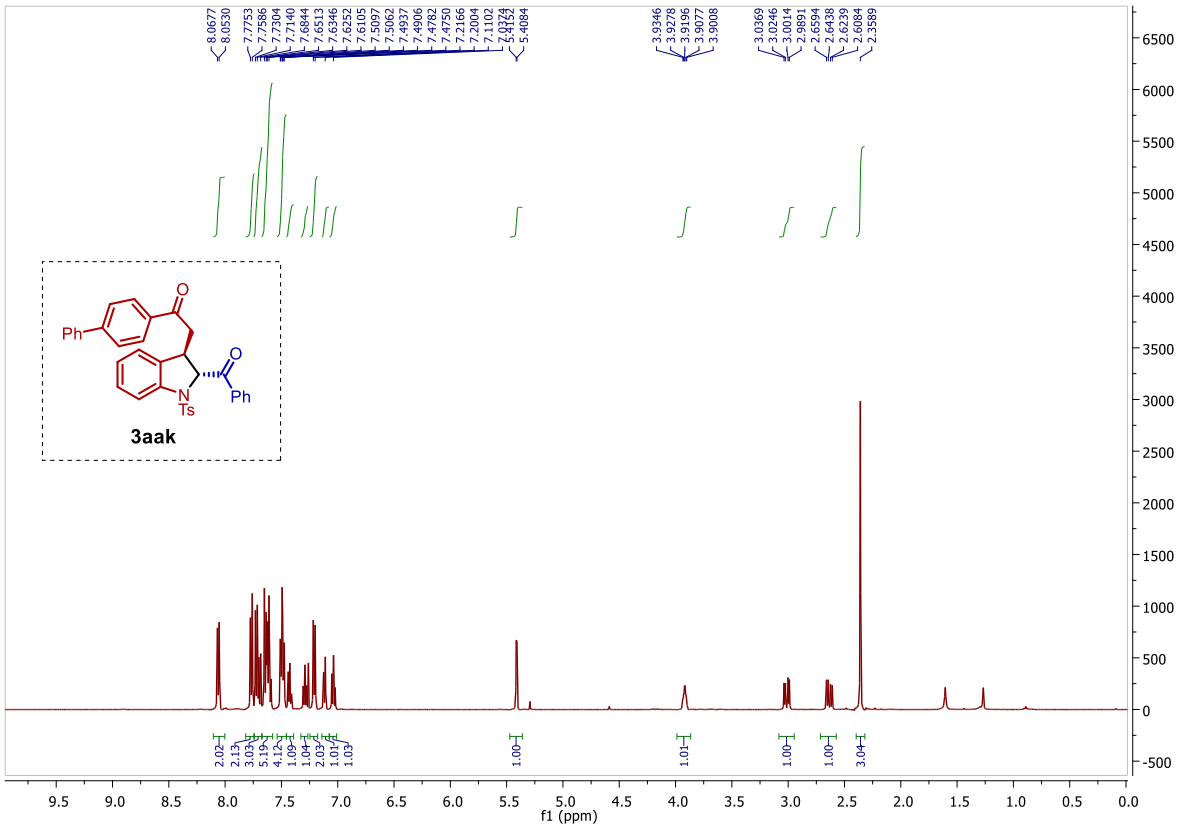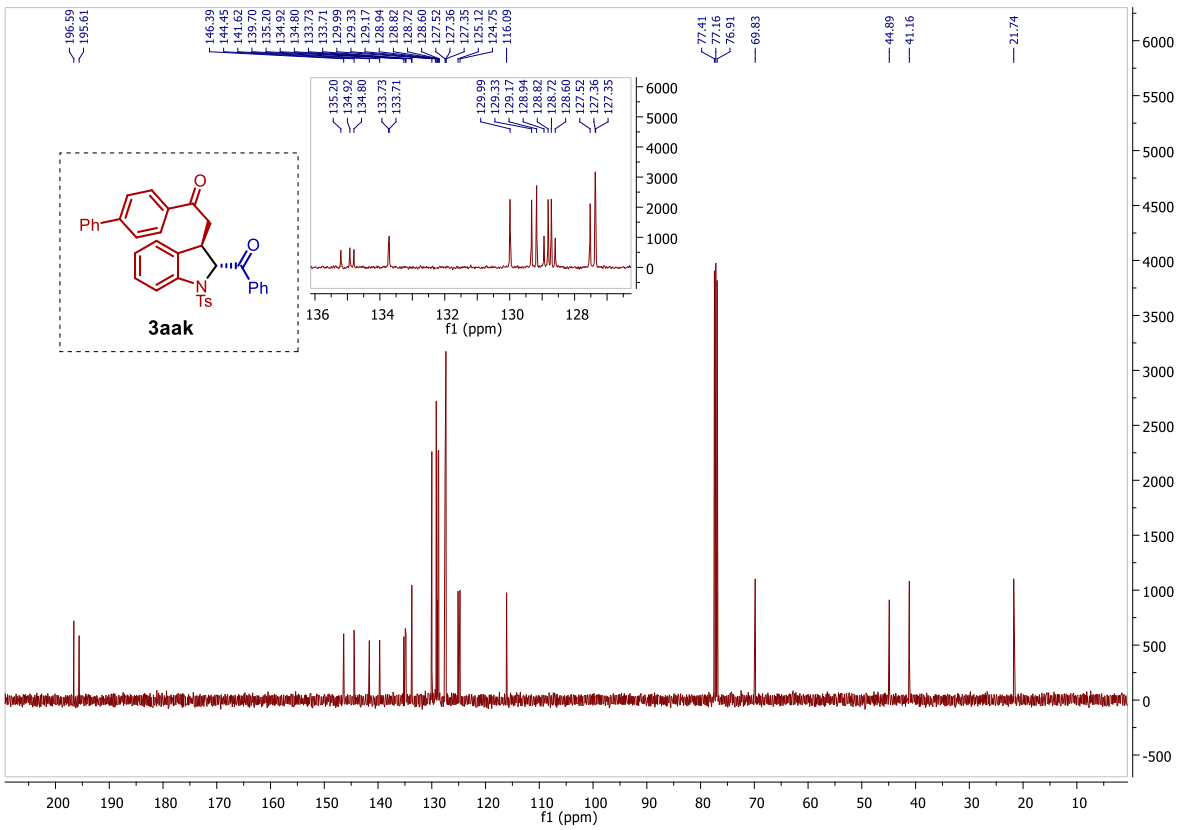

CDCl<sub>3</sub>, 500 MHz <sup>1</sup>H NMR and 125 MHz <sup>13</sup>C{<sup>1</sup>H} NMR Spectra of **3aak**

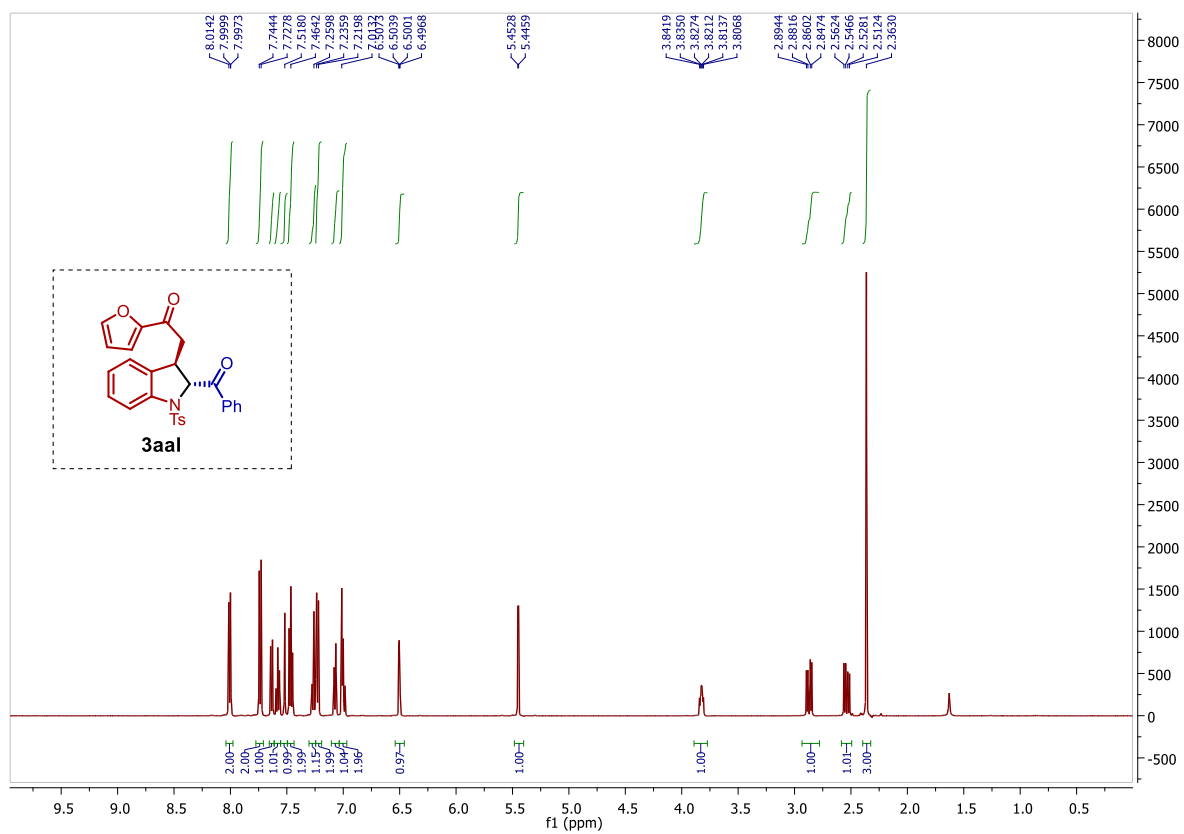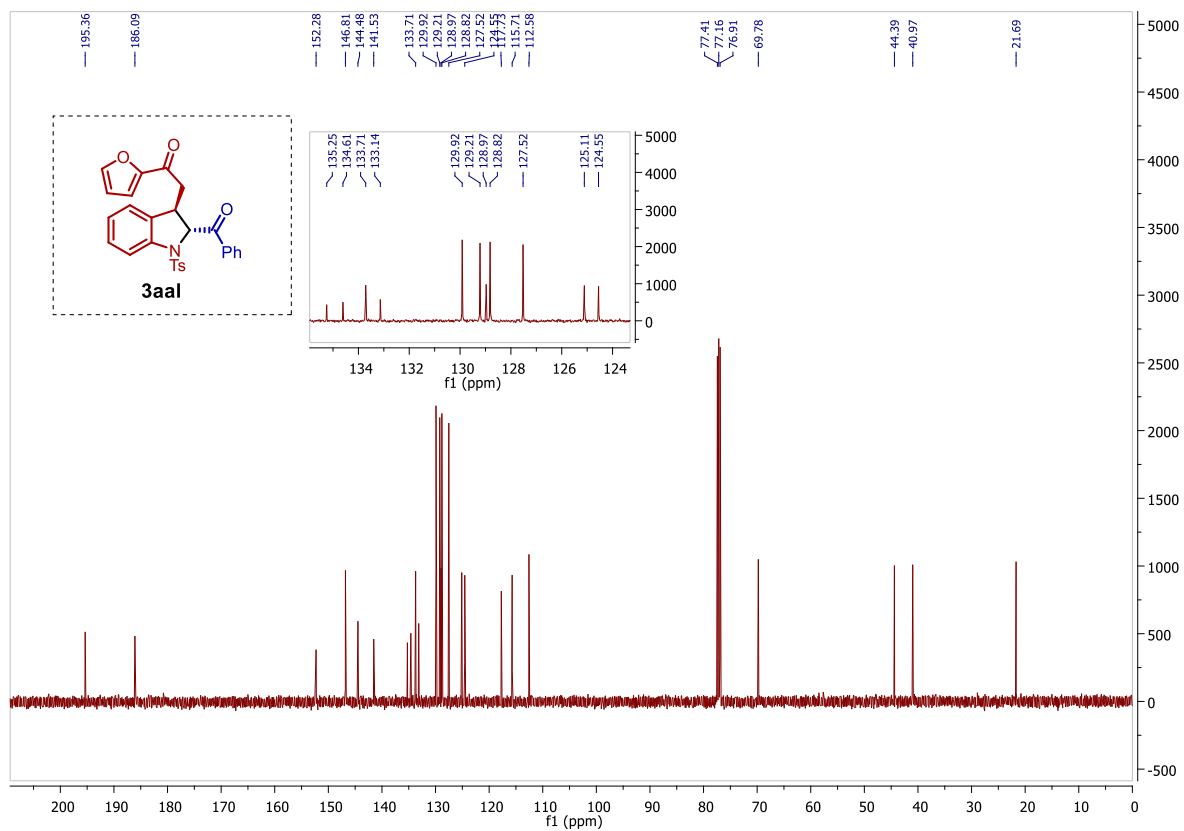

CDCl<sub>3</sub>, 500 MHz <sup>1</sup>H NMR and 125 MHz <sup>13</sup>C{<sup>1</sup>H} NMR Spectra of 3aal

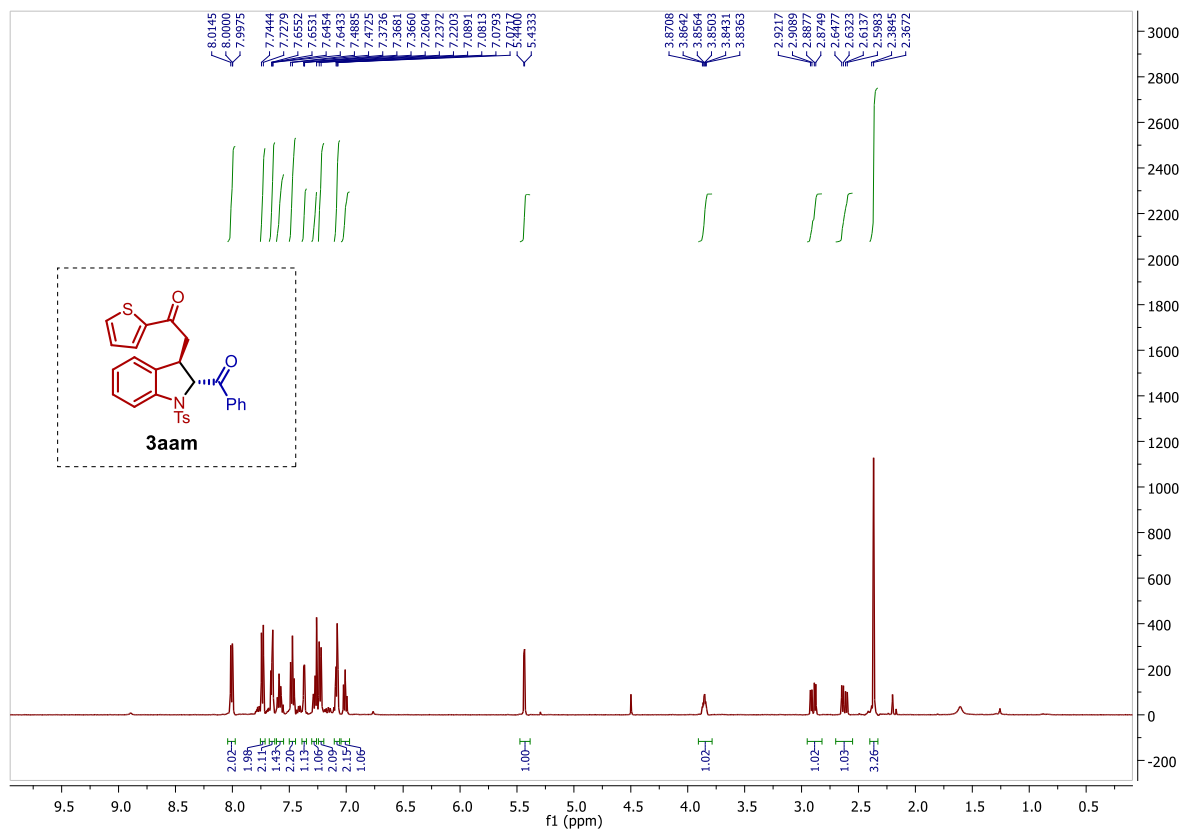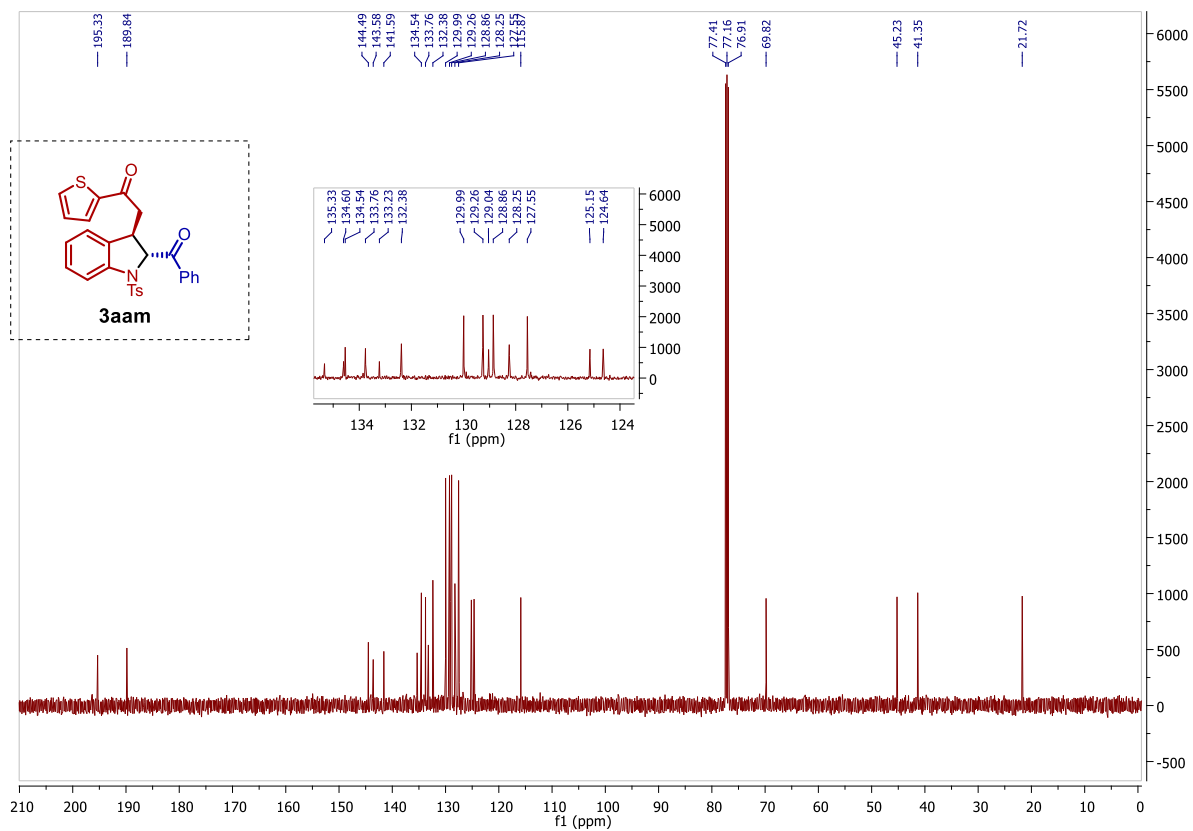

CDCl<sub>3</sub>, 500 MHz <sup>1</sup>H NMR and 125 MHz <sup>13</sup>C{<sup>1</sup>H} NMR Spectra of **3aam**



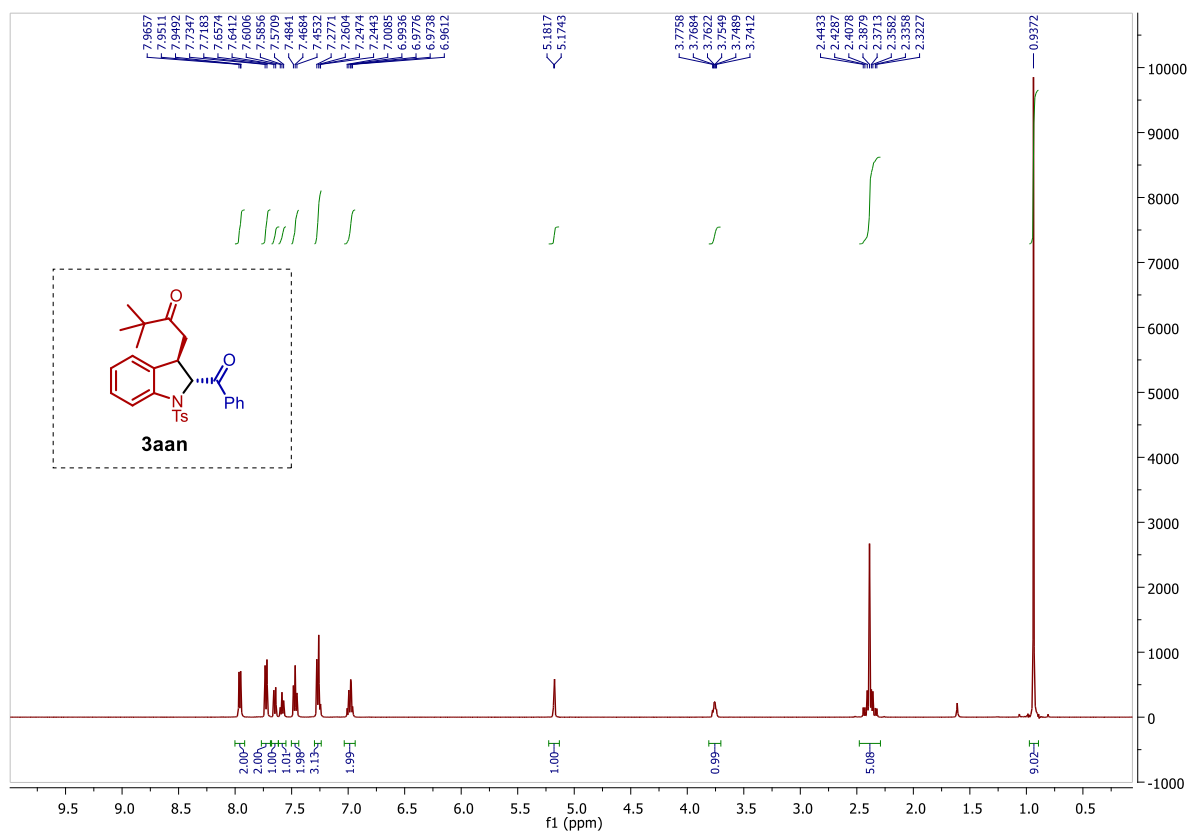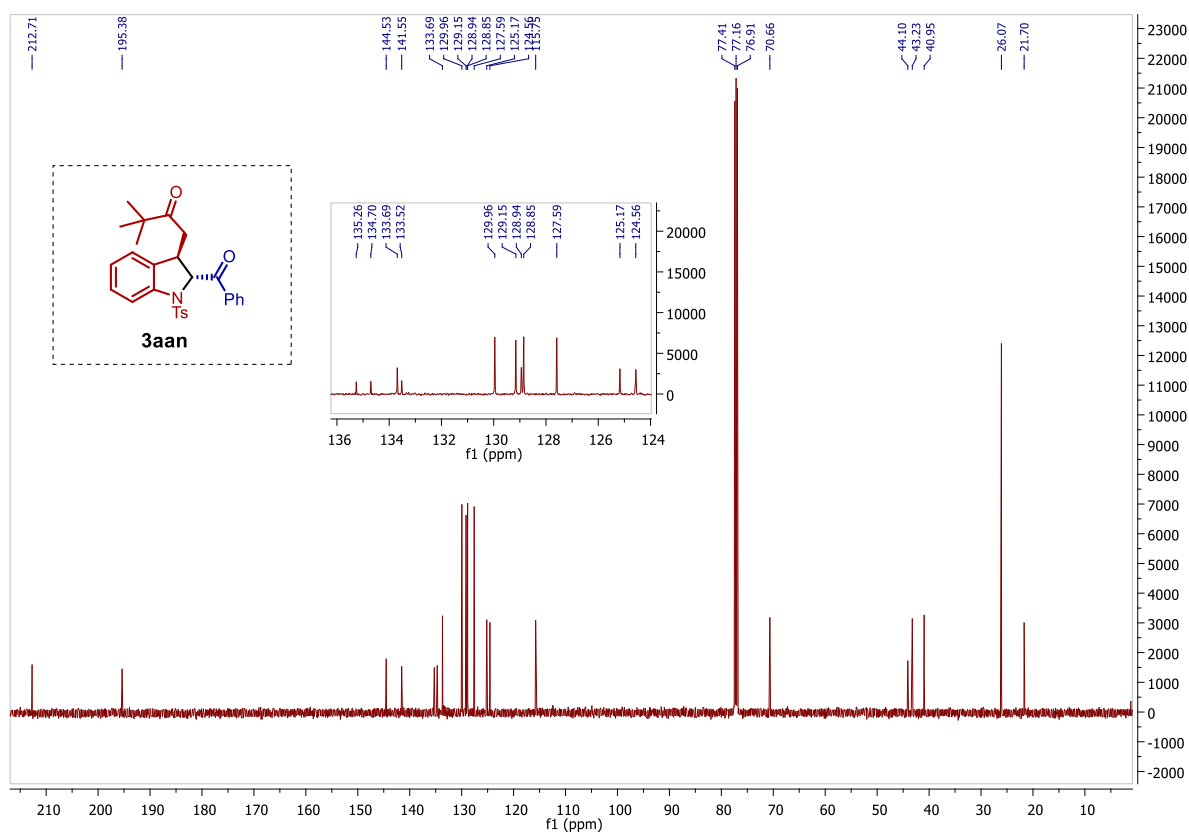

CDCl<sub>3</sub>, 500 MHz <sup>1</sup>H NMR and 125 MHz <sup>13</sup>C{<sup>1</sup>H} NMR Spectra of **3aan**

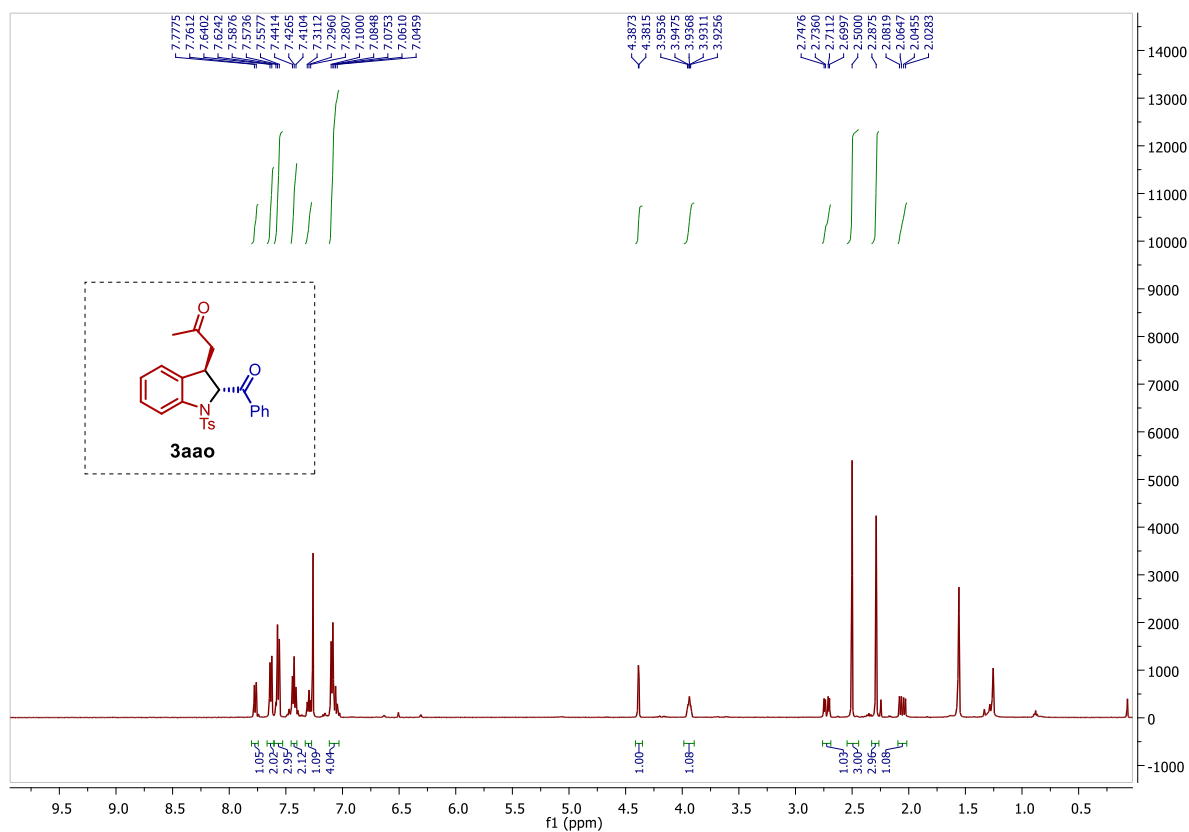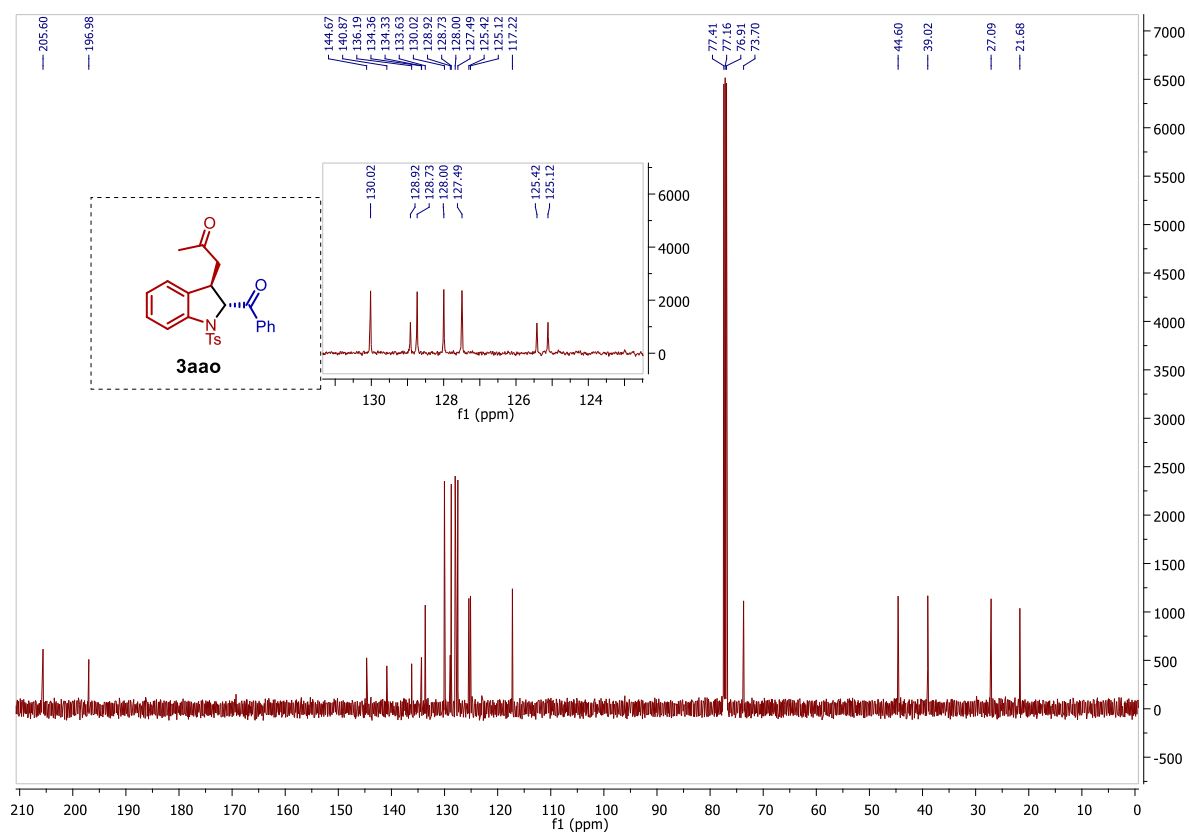

CDCl<sub>3</sub>, 500 MHz <sup>1</sup>H NMR and 125 MHz <sup>13</sup>C{<sup>1</sup>H} NMR Spectra of 3ao

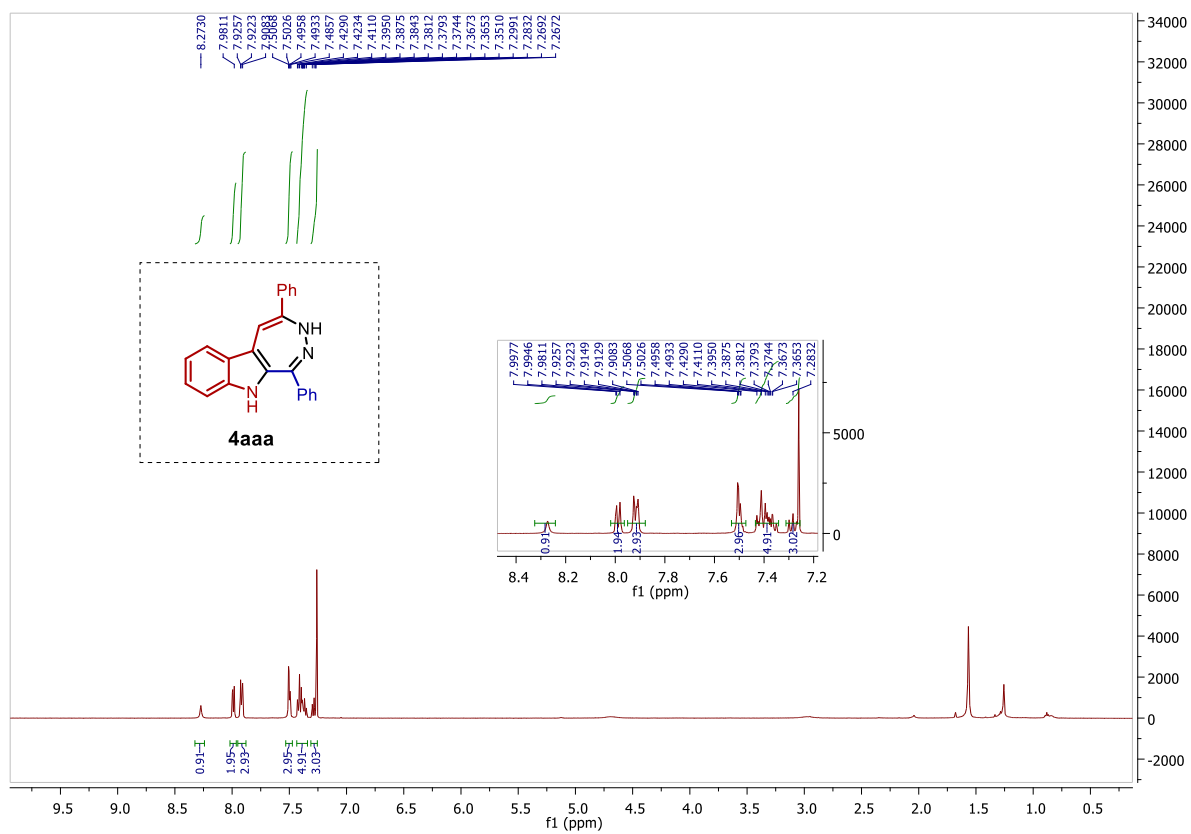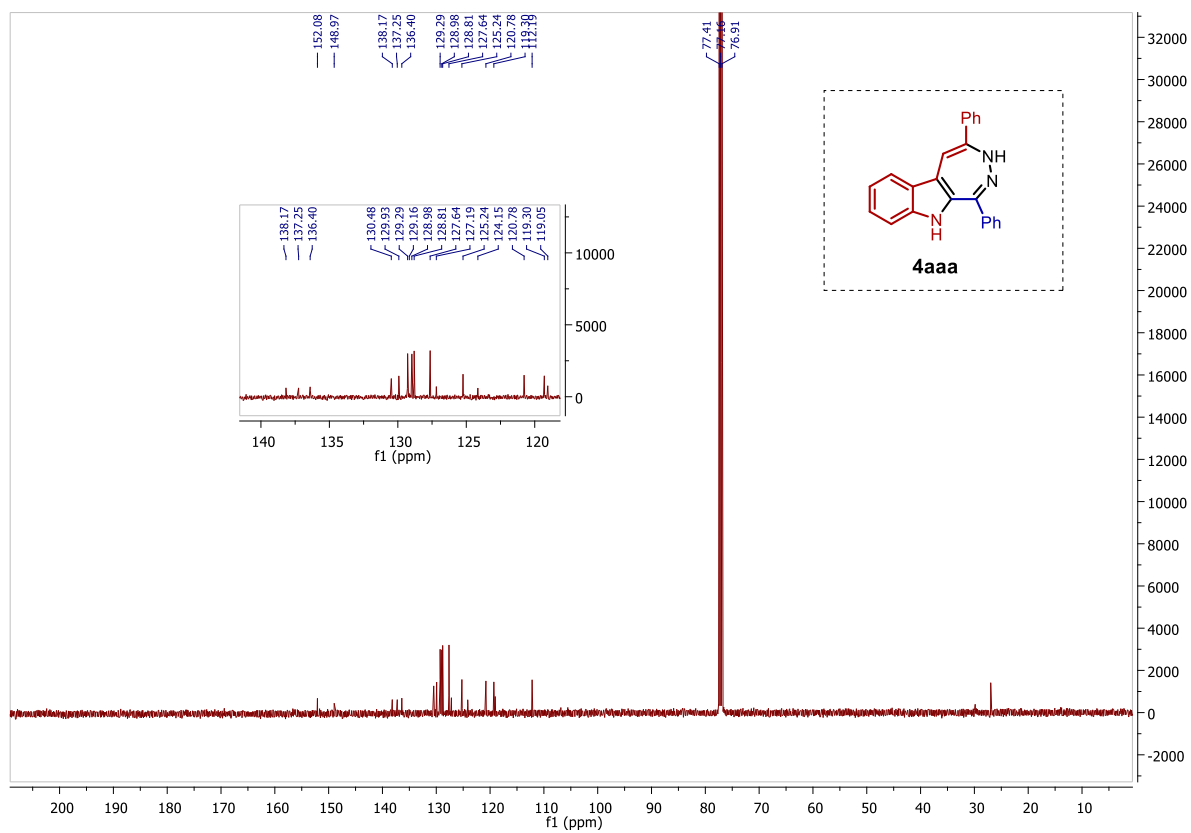

$\text{CDCl}_3$ , 500 MHz  $^1\text{H}$  NMR and 125 MHz  $^{13}\text{C}\{^1\text{H}\}$  NMR Spectra of **4aaa**

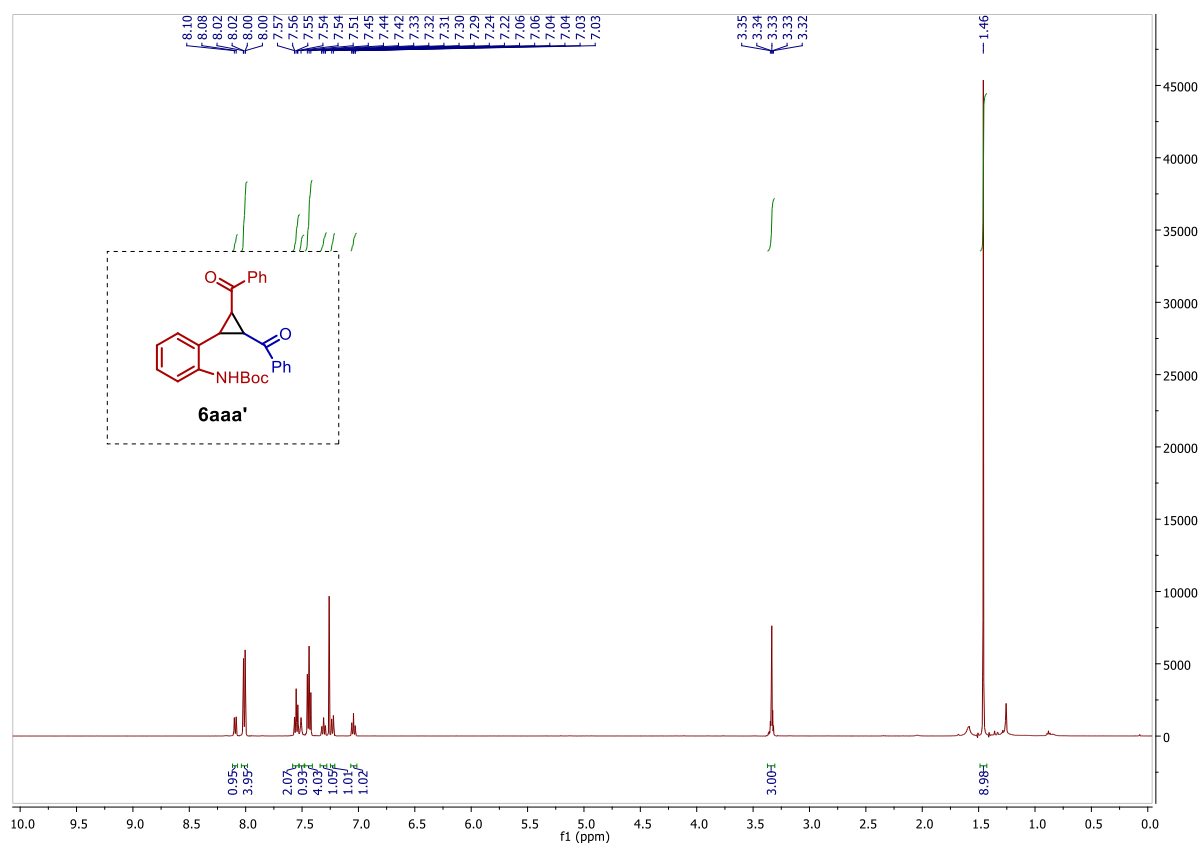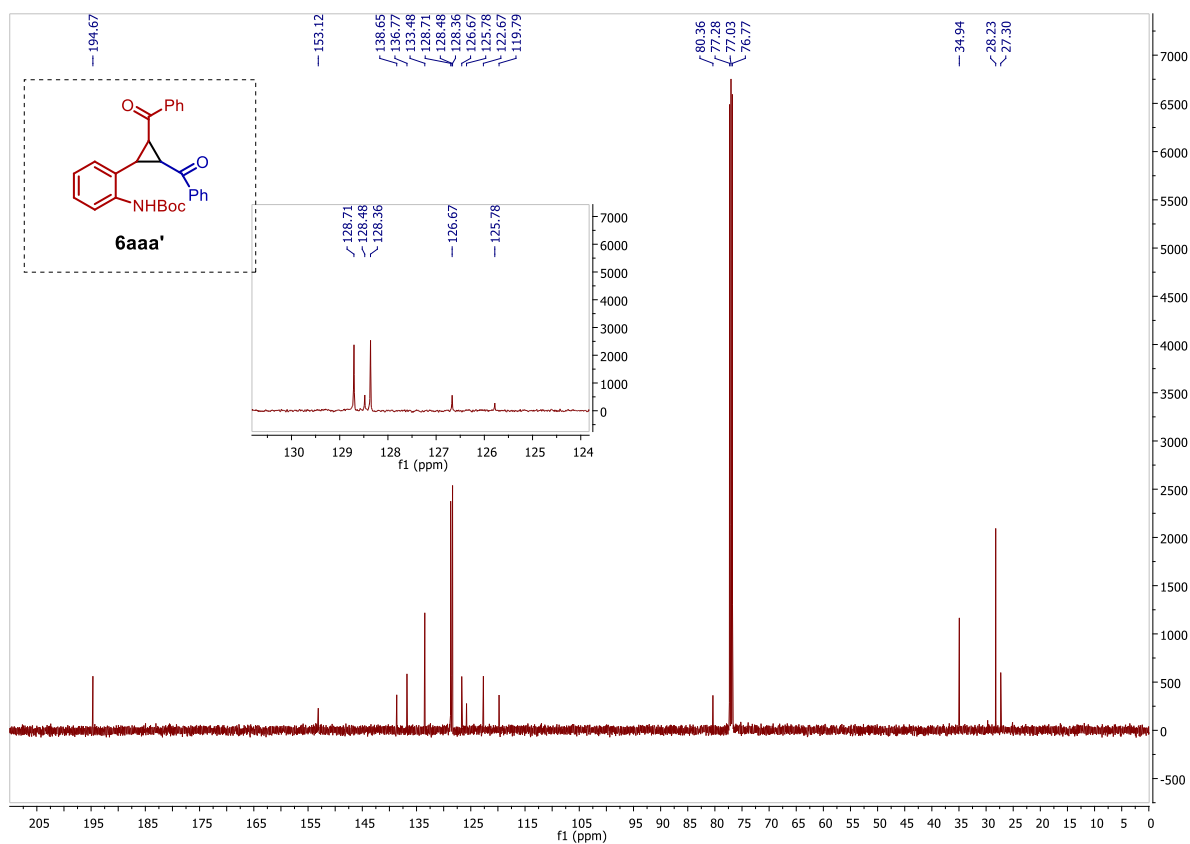

CDCl<sub>3</sub>, 500 MHz <sup>1</sup>H NMR and 125 MHz <sup>13</sup>C{<sup>1</sup>H} NMR Spectra of **6aaa'**

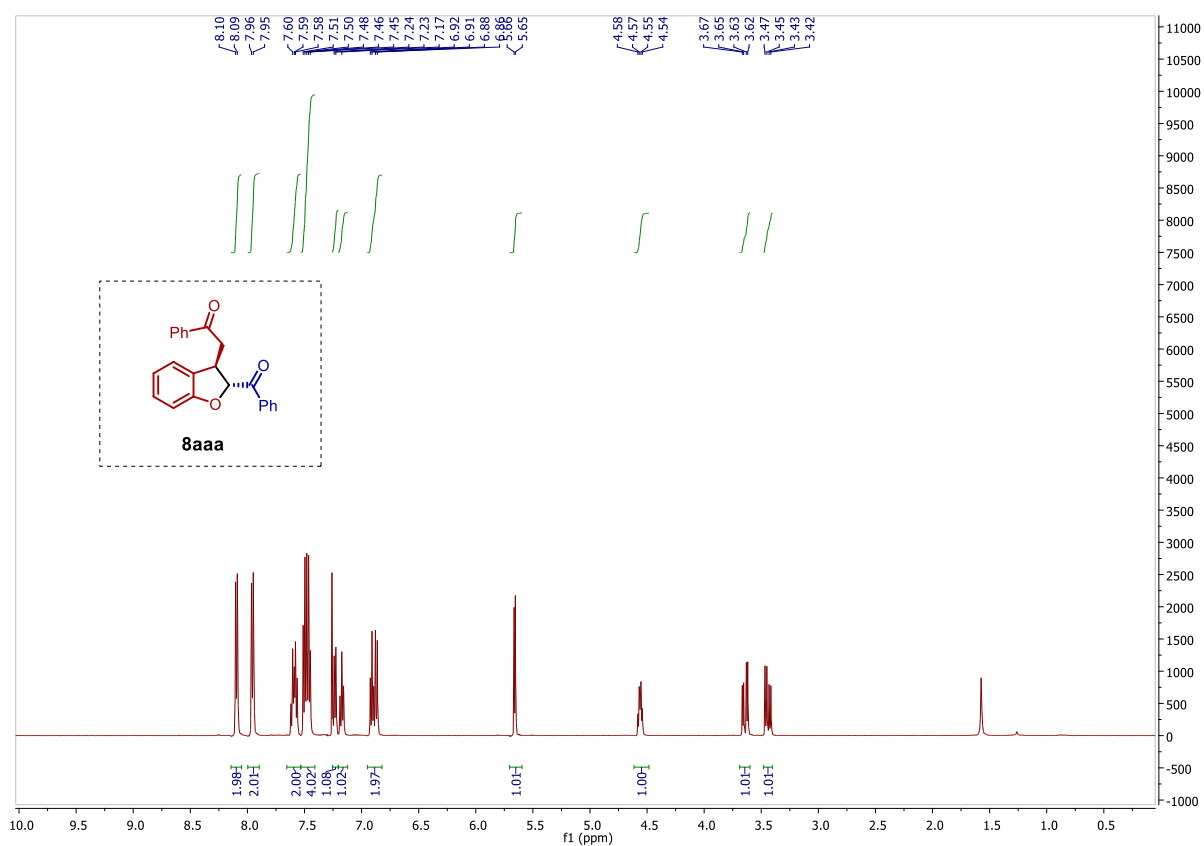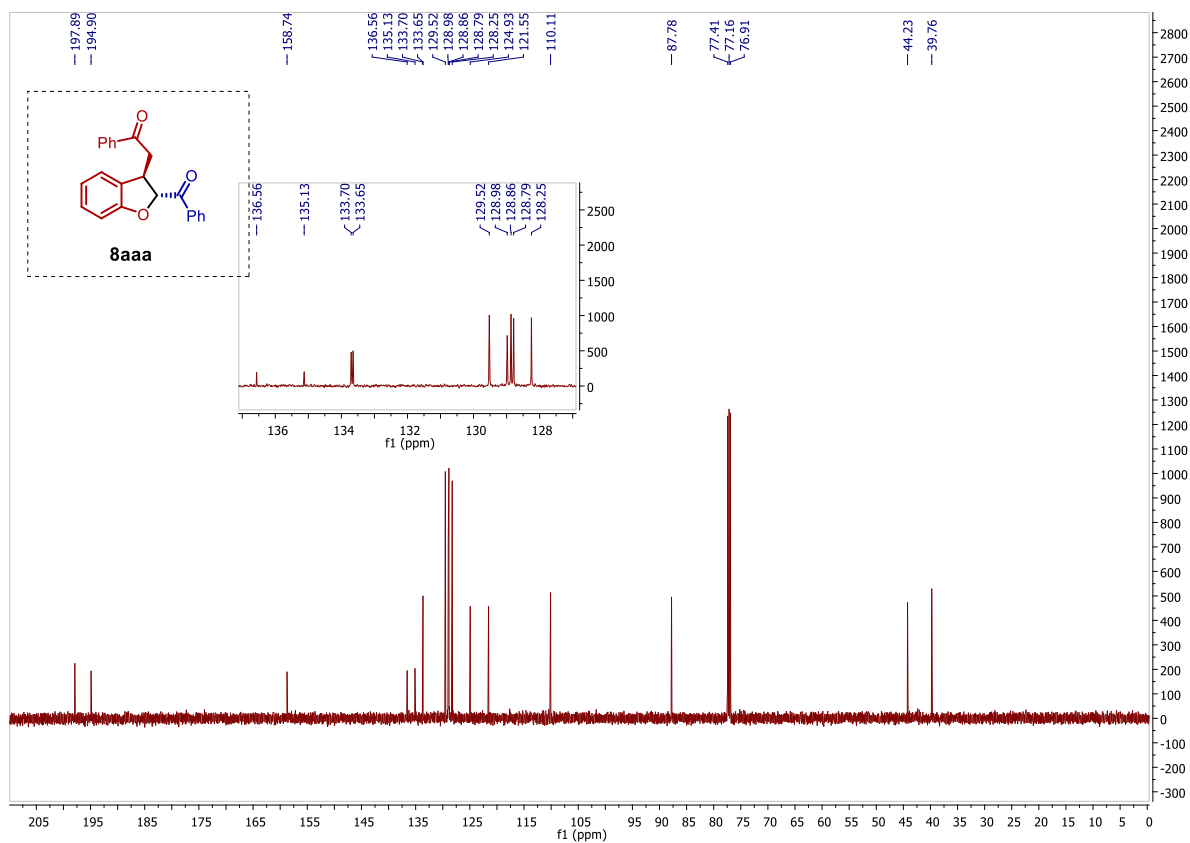

CDCl<sub>3</sub>, 500 MHz <sup>1</sup>H NMR and 125 MHz <sup>13</sup>C{<sup>1</sup>H} NMR Spectra of **8aaa**

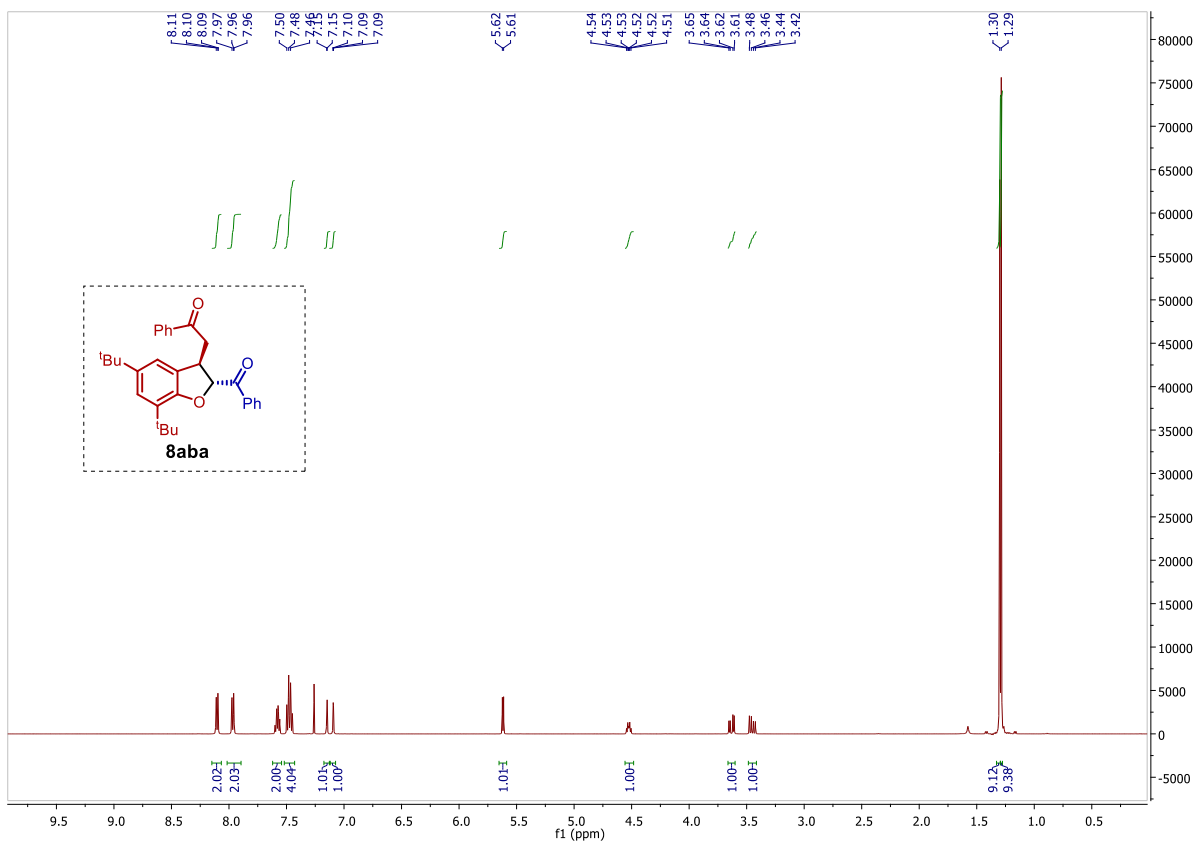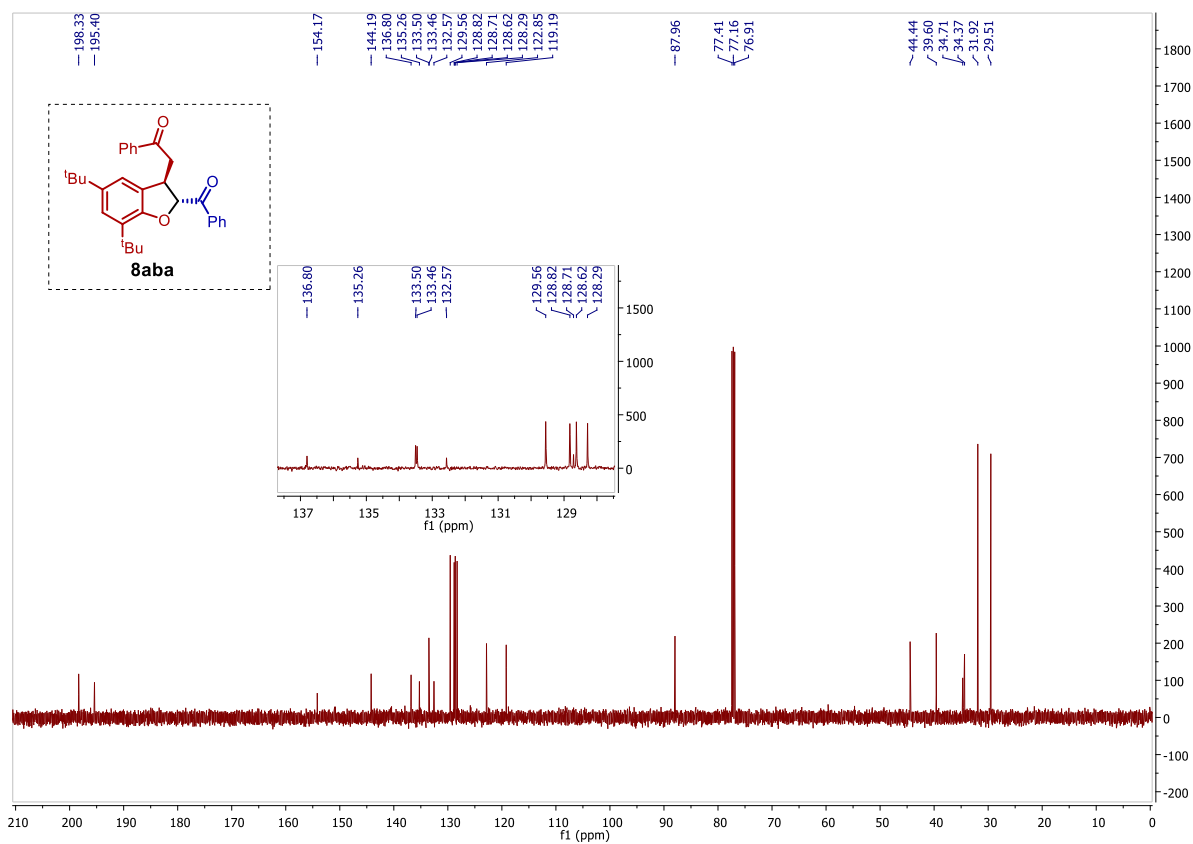

CDCl<sub>3</sub>, 500 MHz <sup>1</sup>H NMR and 125 MHz <sup>13</sup>C{<sup>1</sup>H} NMR Spectra of 8aba

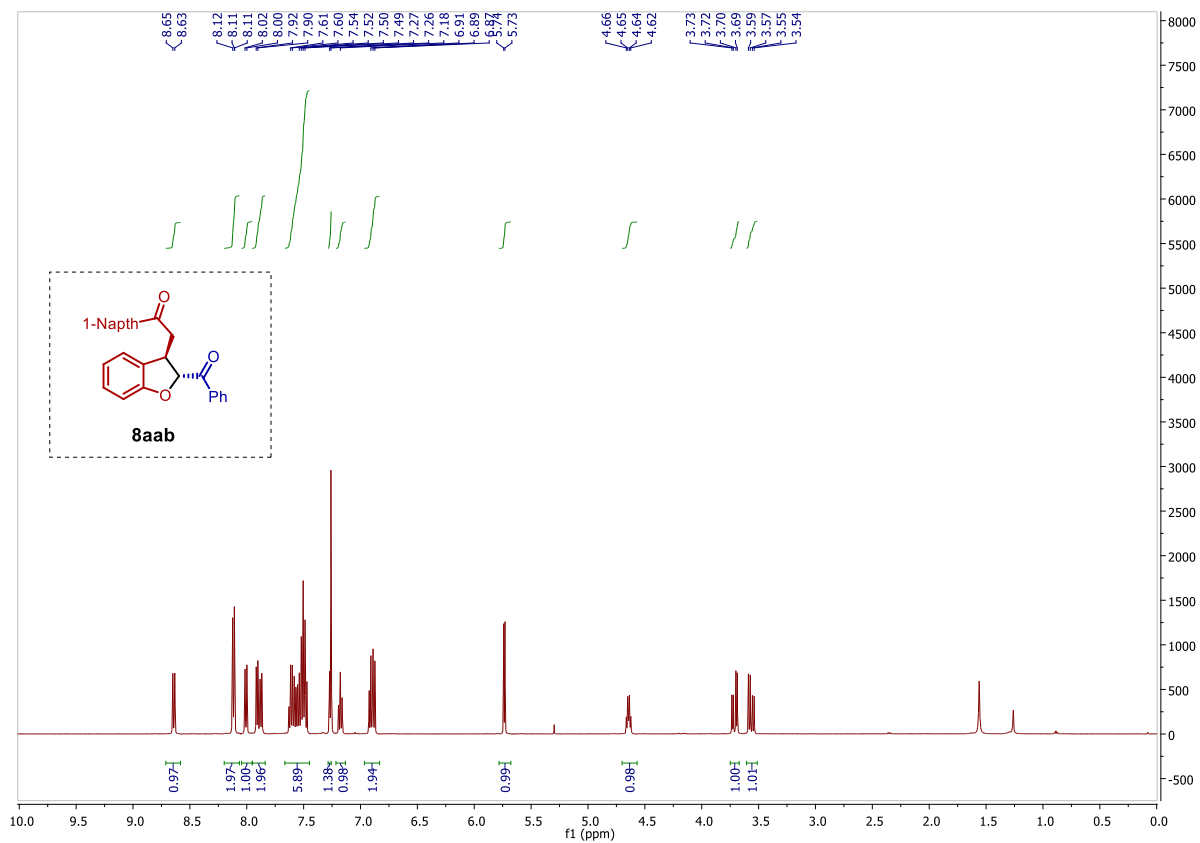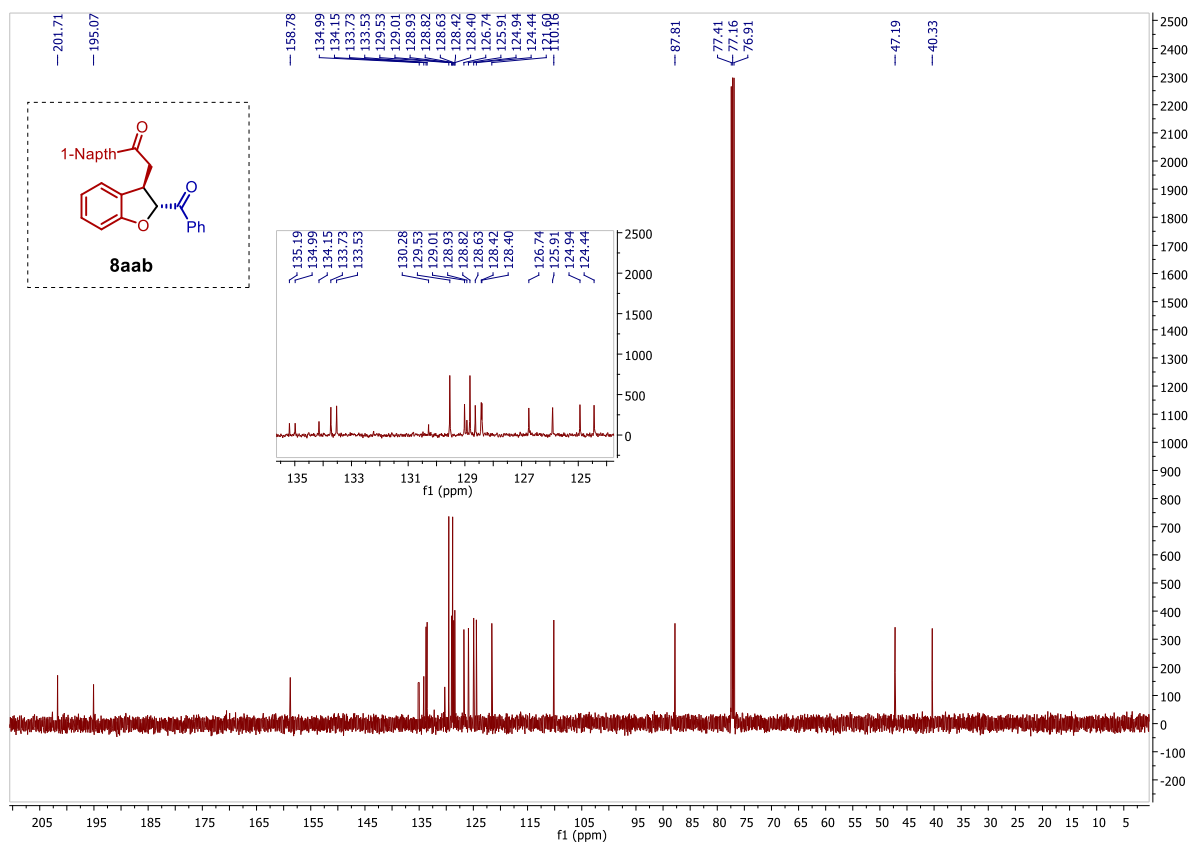

CDCl<sub>3</sub>, 500 MHz <sup>1</sup>H NMR and 125 MHz <sup>13</sup>C{<sup>1</sup>H} NMR Spectra of **8aab**

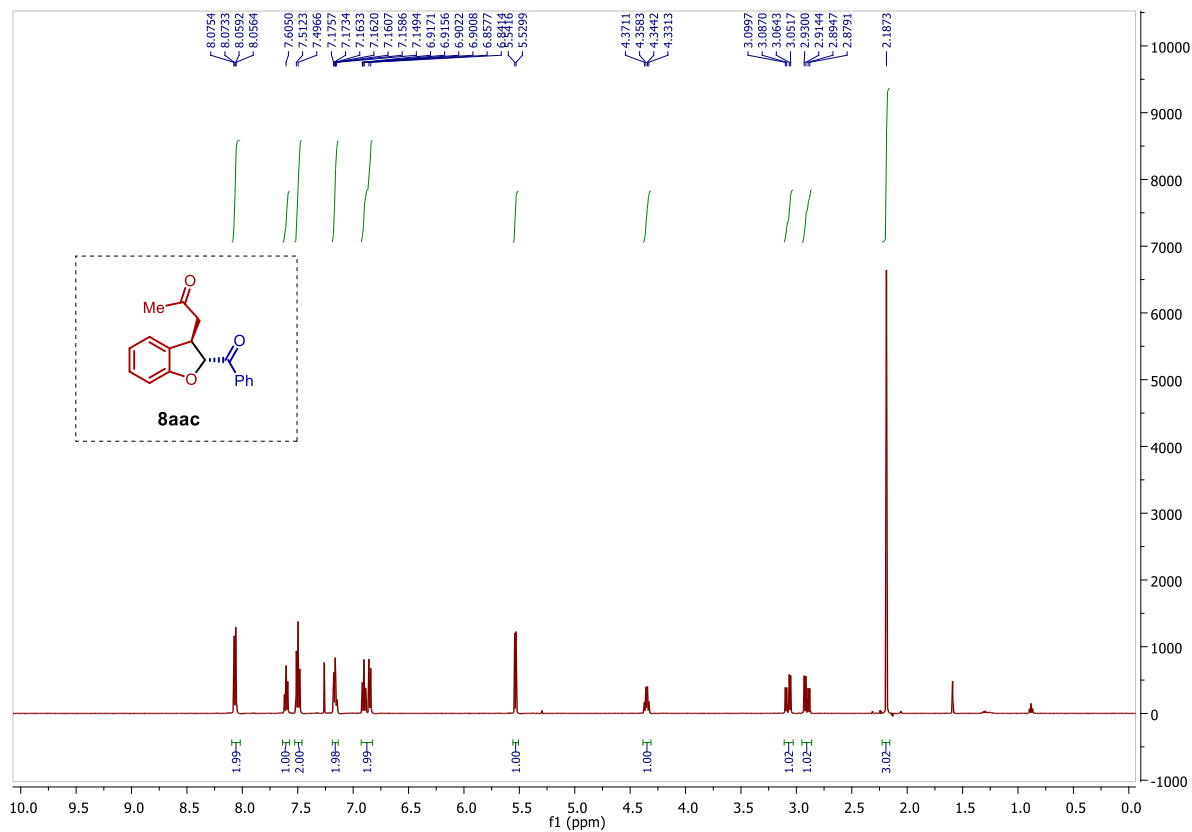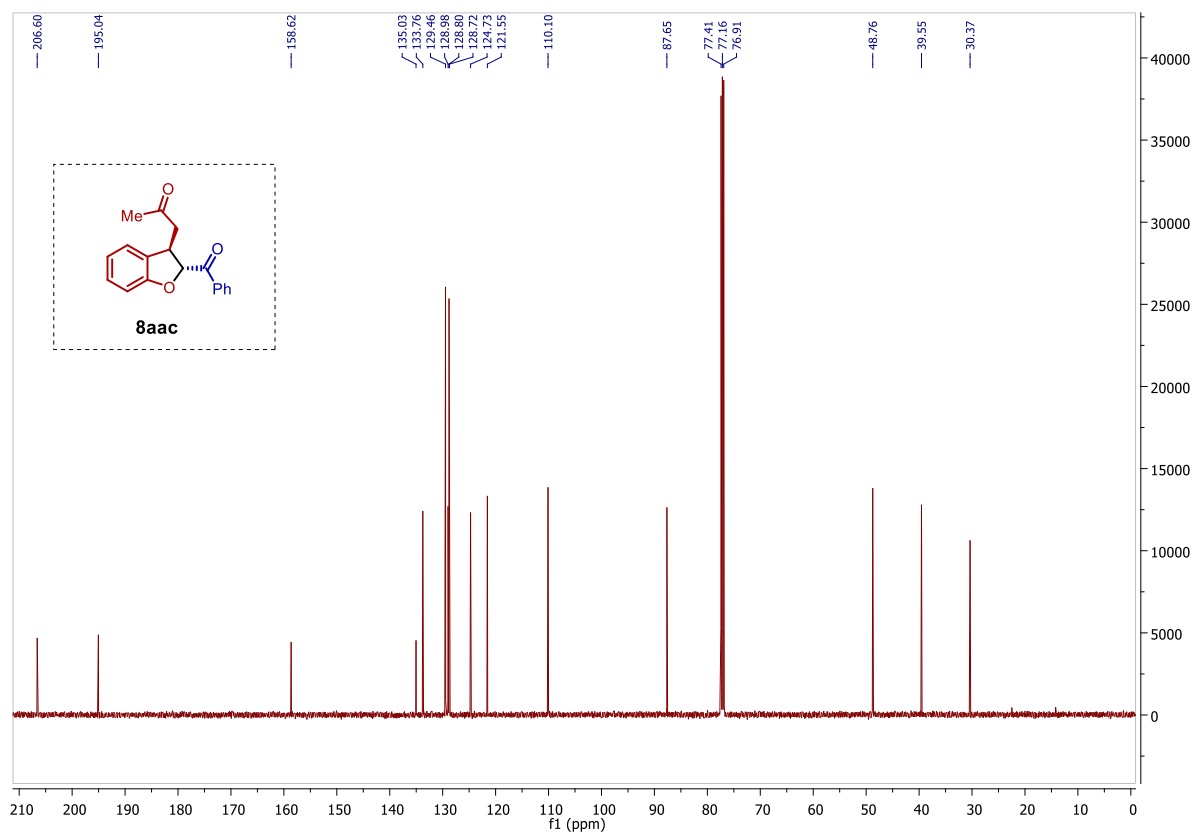

CDCl<sub>3</sub>, 500 MHz <sup>1</sup>H NMR and 125 MHz <sup>13</sup>C{<sup>1</sup>H} NMR Spectra of 8aac



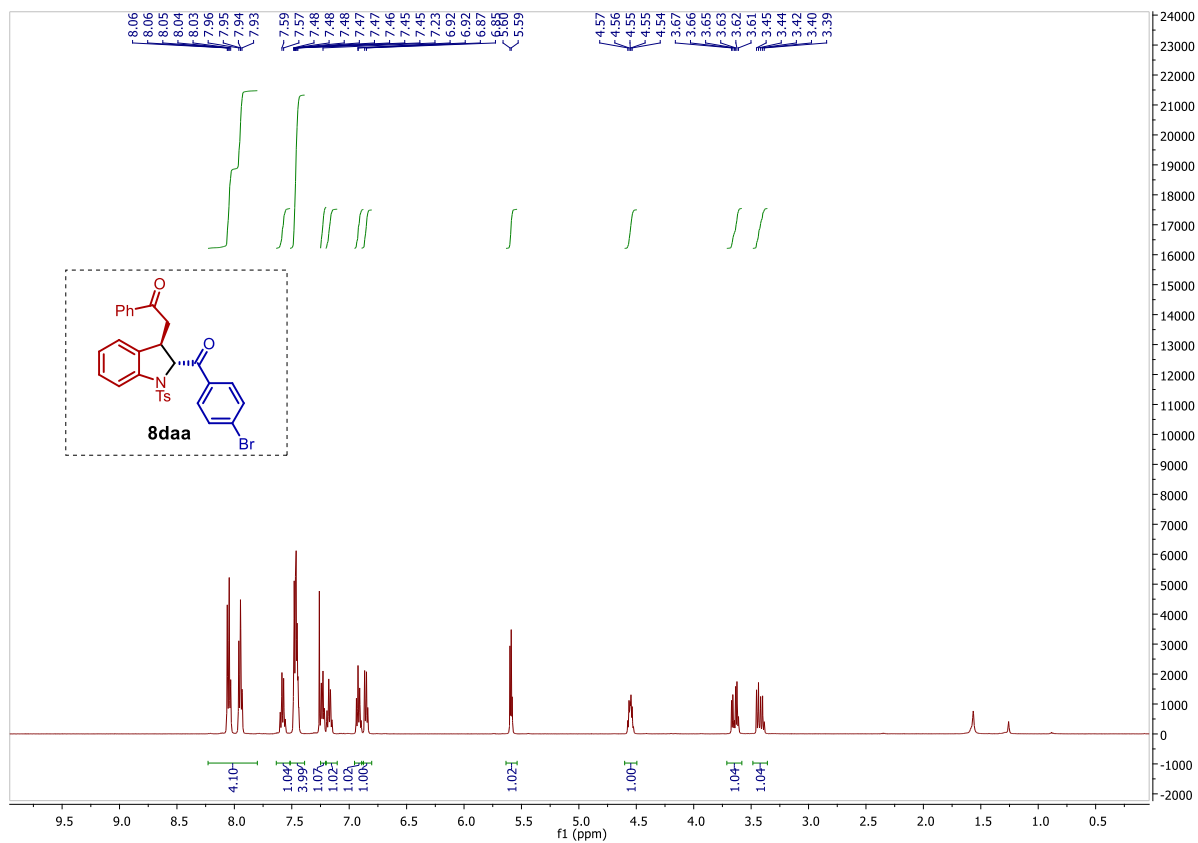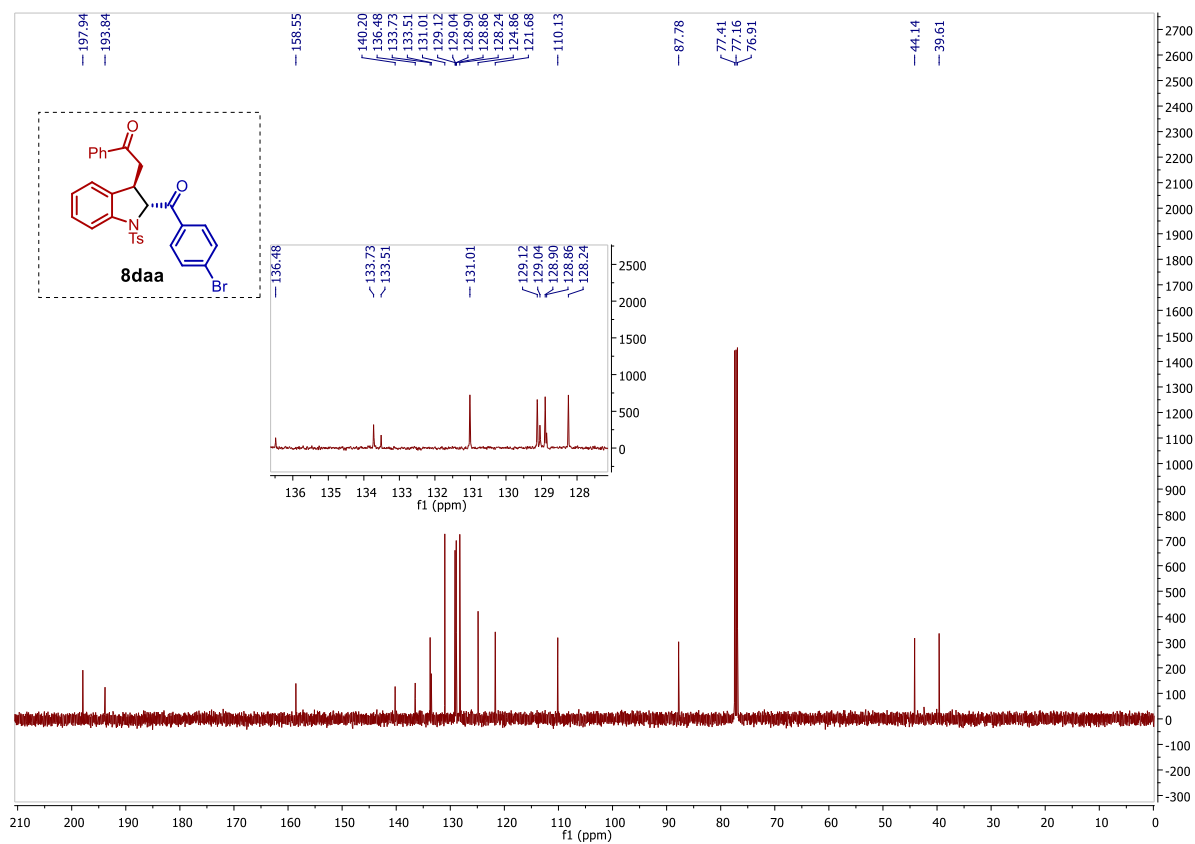

CDCl<sub>3</sub>, 500 MHz <sup>1</sup>H NMR and 125 MHz <sup>13</sup>C{<sup>1</sup>H} NMR Spectra of 8daa

## 2. HRMS Data

### Spectrum Plot Report

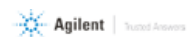

| Name           | AJ-364_B   | Rack Pos.    | Instrument     | Instrument 1 | Operator                        |
|----------------|------------|--------------|----------------|--------------|---------------------------------|
| Inj. Vol. (ul) | 1          | Plate Pos.   | IRM Status     | Success      |                                 |
| Data File      | AJ-364_B.d | Method (Acq) | KAMAL Method.m | Comment      | Acq. Time (Local)               |
|                |            |              |                |              | 23-11-2023 17:13:41 (UTC+05:30) |

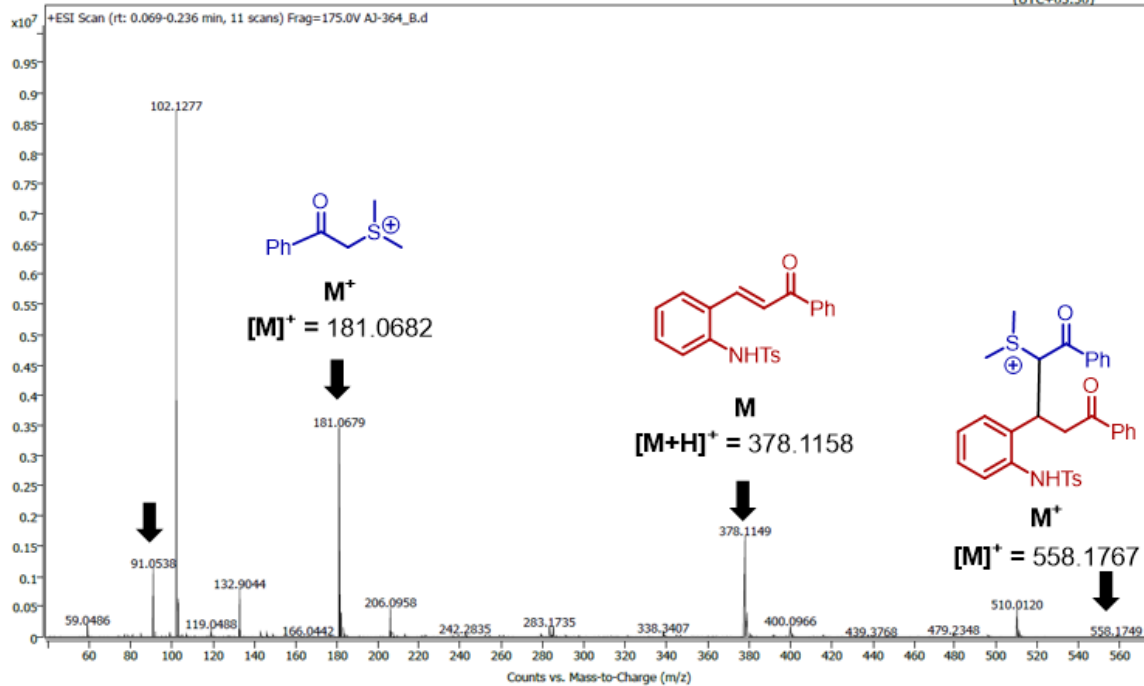

Page 1 of 1

Generated at 17:18 on 23-11-2023

## HRMS data of Crude reaction mixture

### Spectrum Plot Report

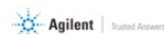

| Name           | AKU-341   | Rack Pos.    | Instrument     | Instrument 1 | Operator                        |
|----------------|-----------|--------------|----------------|--------------|---------------------------------|
| Inj. Vol. (ul) | 1         | Plate Pos.   | IRM Status     | Success      |                                 |
| Data File      | AKU-341.d | Method (Acq) | KAMAL Method.m | Comment      | Acq. Time (Local)               |
|                |           |              |                |              | 22-11-2023 15:33:56 (UTC+05:30) |

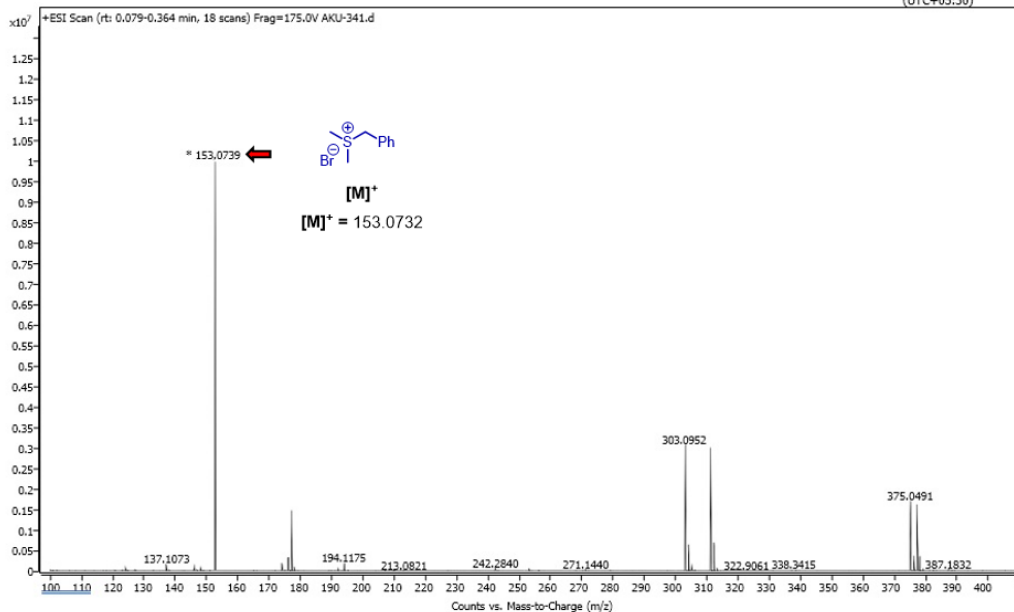

# HRMS data of 1u

## Spectrum Plot Report

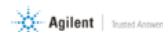

|                |            |              |                |              |                                 |
|----------------|------------|--------------|----------------|--------------|---------------------------------|
| Name           | AJ-SALT2   | Rack Pos.    | Instrument     | Instrument 1 | Operator                        |
| Inj. Vol. (µl) | 1          | Plate Pos.   | IRM Status     | Success      |                                 |
| Data File      | AJ-SALT2.d | Method (Acq) | KAMAL Method.m |              | Acq. Time (Local)               |
|                |            |              |                |              | 24-11-2023 12:18:31 (UTC+05:30) |

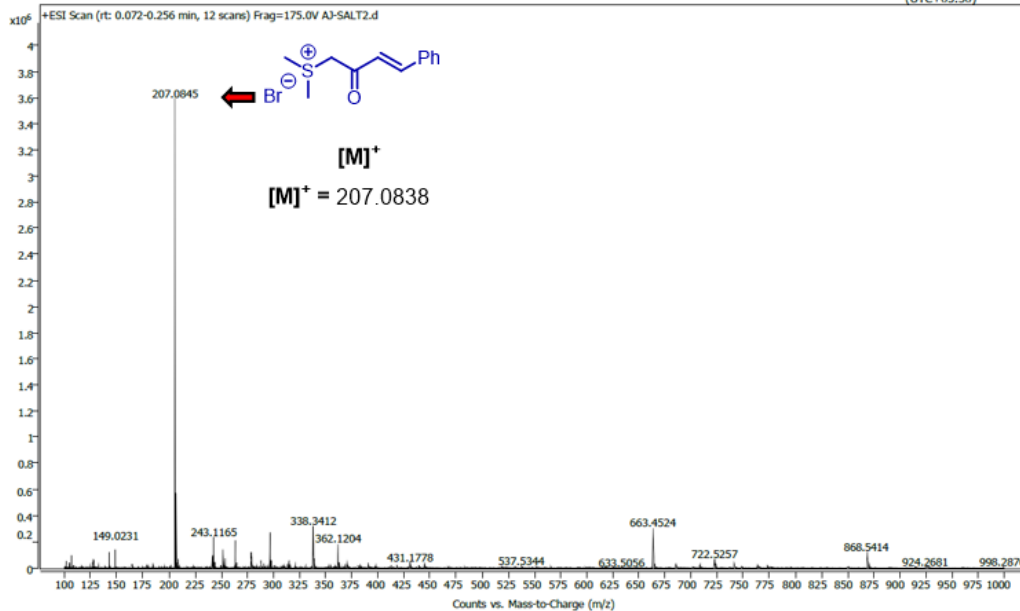

# HRMS data of 1v

## Spectrum Plot Report

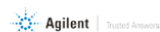

|                |           |              |                |              |                                 |
|----------------|-----------|--------------|----------------|--------------|---------------------------------|
| Name           | AJ-3595   | Rack Pos.    | Instrument     | Instrument 1 | Operator                        |
| Inj. Vol. (µl) | 1         | Plate Pos.   | IRM Status     | Success      |                                 |
| Data File      | AJ-3595.d | Method (Acq) | KAMAL Method.m |              | Acq. Time (Local)               |
|                |           |              |                |              | 20-11-2023 17:05:56 (UTC+05:30) |

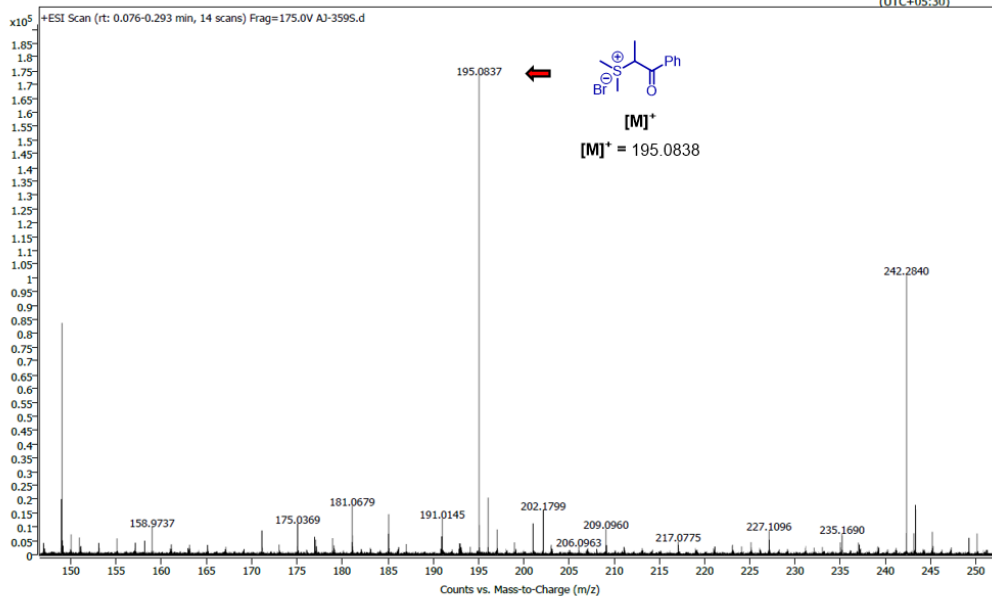

# HRMS data of 1w

## Spectrum Plot Report

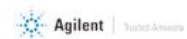

|                |          |              |                |            |              |                   |                                 |
|----------------|----------|--------------|----------------|------------|--------------|-------------------|---------------------------------|
| Name           | AJ-366   | Rack Pos.    |                | Instrument | Instrument 1 | Operator          |                                 |
| Inj. Vol. (ul) | 1        | Plate Pos.   |                | IRM Status | Success      |                   |                                 |
| Data File      | AJ-366.d | Method (Acq) | KAMAL Method.m | Comment    |              | Acq. Time (Local) | 20-11-2023 17:02:17 (UTC+05:30) |

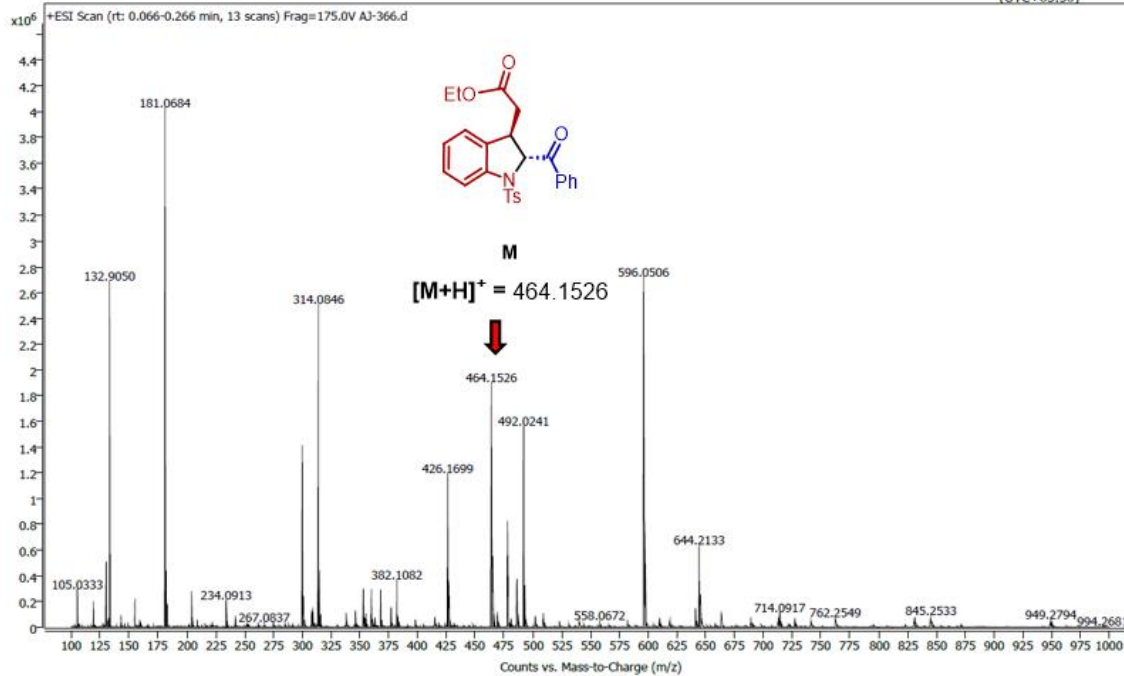

# HRMS data of 3aap

### 3. HPLC graph

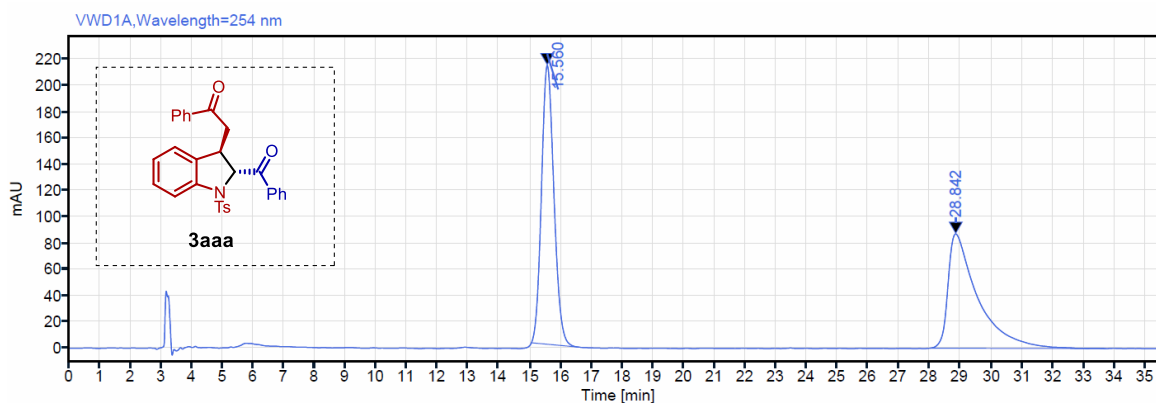

Signal: VWD1A,Wavelength=254 nm

| RT [min]   | Type | Width [min] | Area            | Height | Area% | Name |
|------------|------|-------------|-----------------|--------|-------|------|
| 15.560     | BB   | 1.56        | 5980.13         | 212.72 | 50.55 |      |
| 28.842     | MM   | 5.72        | 5848.87         | 87.21  | 49.45 |      |
| <b>Sum</b> |      |             | <b>11829.00</b> |        |       |      |

#### HPLC graph of racemic 3aaa

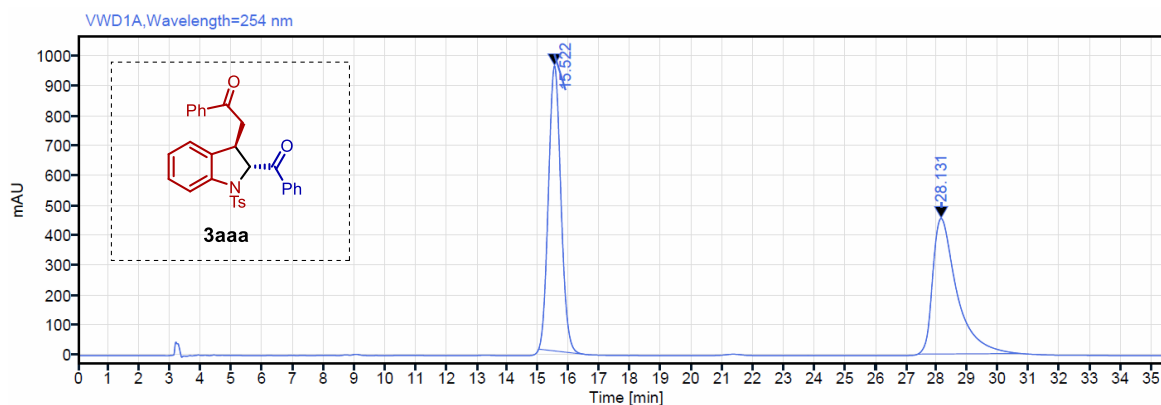

Signal: VWD1A,Wavelength=254 nm

| RT [min]   | Type | Width [min] | Area            | Height | Area% | Name |
|------------|------|-------------|-----------------|--------|-------|------|
| 15.522     | IB   | 1.55        | 26850.43        | 952.79 | 52.04 |      |
| 28.131     | BB   | 3.36        | 24748.37        | 452.84 | 47.96 |      |
| <b>Sum</b> |      |             | <b>51598.80</b> |        |       |      |

#### HPLC graph of enantioenriched 3aaa

#### 4. X-ray crystal analysis of structure **3aaa**.

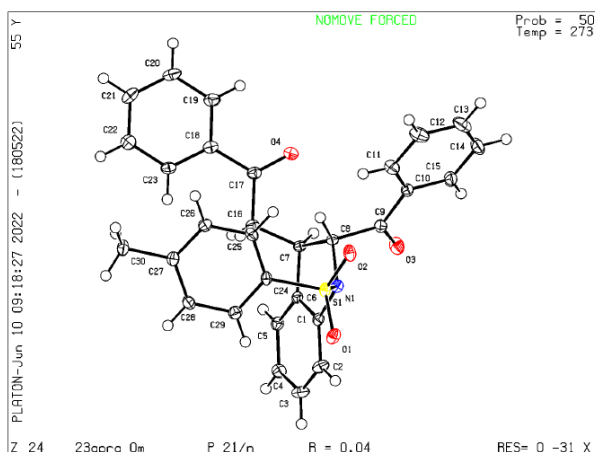

**Figure S1:** ORTEP Diagram of **3aaa** (CCDC 2178470)

**Table S1:** Crystal data and structure refinement for **3aaa**.

| Identification code                | <b>3aaa</b>                                       |
|------------------------------------|---------------------------------------------------|
| Empirical formula                  | C <sub>30</sub> H <sub>25</sub> NO <sub>4</sub> S |
| Formula weight                     | 495.57                                            |
| Temperature/K                      | 273.15                                            |
| Crystal system                     | monoclinic                                        |
| Space group                        | P2 <sub>1</sub> /n                                |
| a/Å                                | 8.1168(14)                                        |
| b/Å                                | 17.929(3)                                         |
| c/Å                                | 16.686(3)                                         |
| α/°                                | 90                                                |
| β/°                                | 94.685(6)                                         |
| γ/°                                | 90                                                |
| Volume/Å <sup>3</sup>              | 2420.1(7)                                         |
| Z                                  | 4                                                 |
| ρ <sub>calc</sub> /cm <sup>3</sup> | 1.360                                             |
| μ/mm <sup>-1</sup>                 | 0.172                                             |
| F(000)                             | 1040.0                                            |
| Crystal size/mm <sup>3</sup>       | 0.2 × 0.2 × 0.2                                   |
| Radiation                          | MoKα (λ = 0.71073)                                |

|                                                  |                                                                    |
|--------------------------------------------------|--------------------------------------------------------------------|
| 2 $\theta$ range for data collection/ $^{\circ}$ | 5.524 to 56.784                                                    |
| Index ranges                                     | $-10 \leq h \leq 10$ , $-23 \leq k \leq 23$ , $-22 \leq l \leq 22$ |
| Reflections collected                            | 35876                                                              |
| Independent reflections                          | 5987 [ $R_{\text{int}} = 0.0403$ , $R_{\text{sigma}} = 0.0293$ ]   |
| Data/restraints/parameters                       | 5987/0/326                                                         |
| Goodness-of-fit on $F^2$                         | 1.188                                                              |
| Final R indexes [ $I \geq 2\sigma(I)$ ]          | $R_1 = 0.0444$ , $wR_2 = 0.1426$                                   |
| Final R indexes [all data]                       | $R_1 = 0.0527$ , $wR_2 = 0.1522$                                   |
| Largest diff. peak/hole / $e \text{ \AA}^{-3}$   | 0.45/-0.40                                                         |
